# Supplementary material for: Metalloligands based on Robson-type amino-thiophenolato macrocycles for assembly of heterotrimetallic complexes
Source: Royal Society of Chemistry journal article supplement (doi:10.1039/d1dt00723h), 2021-01-01
Supplement: d1dt00723h1.pdf [file d1dt00723h1.pdf]

## Metalloligands based on Robson-type Amino-Thiophenolato Macrocycles for Assembly of Heterotrimetallic Complexes

Sara Schmorl,<sup>a</sup> Sergej Naumov,<sup>b</sup> Bernd Abel,<sup>b,c</sup> Martin Börner,<sup>a</sup> Andreas Pöpl,<sup>d</sup> and  
Berthold Kersting<sup>a\*</sup>

<sup>a</sup> *Institut für Anorganische Chemie, Universität Leipzig, Johannisallee 29, 04103 Leipzig,  
Germany, E-mail: [b.kersting@uni-leipzig.de](mailto:b.kersting@uni-leipzig.de) Fax: +49(0)341-97-36199*

<sup>b</sup> *Leibniz-Institut für Oberflächenmodifizierung (IOM), Abteilung Funktionale Oberflächen,  
Permoserstr. 15, D-04318 Leipzig, Germany*

<sup>c</sup> *Wilhelm-Ostwald-Institut für Physikalische und Theoretische Chemie, Universität Leipzig,  
Linnéstraße 2, D-04103 Leipzig, Germany*

<sup>d</sup> *Fakultät für Physik und Geowissenschaften, Linnestr.3, D-04103 Leipzig, Germany*

**Author Contributions** The manuscript was written through contributions of all authors. SS synthesized and characterized the compounds (IR & UV-vis spectroscopy, mass spectrometry, cyclic voltammetry, and X-ray crystallography), performed magnetic measurements, and determined the magnetic parameters. SN performed all DFT calculations, determined the NH stretching vibrations, and calculated the stability constants and charge shifts of the complexes. MB repeated the synthesis of compound **3** for EPR analysis. AP performed EPR spectroscopic on **3**. BA and BK interpreted the data and wrote the manuscript. BK designed the concept of the manuscript. All authors have given approval to the final version of the manuscript.

### Contents

- 1) Synthesis of Compounds
- 2) Characterization of Compounds by Mass spectrometry
- 3) Characterization of Compounds by Infrared Spectroscopy
- 4) Characterization of Compounds by X-ray crystallography
- 5) Characterization of Compounds by Squid Magnetometry
- 6) Characterization of Compounds by Electronic Absorption Spectroscopy
- 7) Characterization of Compounds by DFT calculations



## 1) Synthesis of Compounds

**Materials and methods:** The ligand  $\text{H}_2\text{L}(\text{HBr})_6$  and the nickel complex **2** were prepared as described in the literature.<sup>S1</sup> All reagents and solvents were commercial grade and used without further purification. The syntheses of the metal complexes were carried out under a protective atmosphere of argon unless stated otherwise. Melting points were determined with an Electrothermal IA9000 series instrument using open glass capillaries and are uncorrected. Elemental analyses were carried out on a VARIO EL elemental analyzer (Elementar Analysensysteme GmbH, Hanau). Mass spectra were recorded using the positive ion electrospray ionization modus (ESI) on a Bruker APEX II FT-ICR instrument. Infrared spectra ( $4000\text{--}400\text{ cm}^{-1}$ ) were recorded at  $1\text{ cm}^{-1}$  resolution on a Bruker TENSOR 27 (equipped with a MIRacle ZnSe ATR accessory from PIKE Technologies) FT-IR spectrometer. Solution electronic absorption spectra were collected on a Jasco V-670 UV-vis-NIR device using 1 cm quartz cells (Hellma). The magnetic susceptibility measurements were performed with the use of a MPMS 7XL SQUID magnetometer (Quantum Design) working between 1.8 and 330 K for applied dc fields ranging from -7 to 7 T. Measurements were performed on polycrystalline samples over the temperature range 2–330 K at applied magnetic field of 1.0 T. The observed susceptibility data were corrected for the underlying diamagnetism using Pascals constants.

**Safety note: CAUTION!** Although no problems were encountered during this work perchlorate salts are potentially explosive. The perchlorate salts should be prepared only in small quantities and handled with appropriate care.

**Attempted synthesis of  $[\text{LCo}^{\text{II}}\text{Co}^{\text{III}}(\mu\text{-F})](\text{ClO}_4)_2$ .** A solution of  $\text{Co}(\text{OAc})_2 \cdot 4\text{H}_2\text{O}$  (43.1 mg, 0.173 mmol, 2.00 eq.) in MeOH (5 mL) was added to a colorless solution of  $\text{H}_2\text{L} \cdot 6\text{HBr}$  (100 mg, 86.5  $\mu\text{mol}$ , 1.00 eq.) in MeOH (30 mL) followed by the base  $\text{NEt}_3$  (70.0 mg, 0.692 mmol, 8.00 eq.). To the resulting brown solution was added an excess of  $\text{N}(n\text{-Bu})_4\text{F} \cdot 3\text{H}_2\text{O}$  (54.6 mg, 0.173 mmol, 2.00 eq.) and the reaction mixture was stirred at room temperature overnight. The flask was then exposed to air, and stirring was continued for further 12 h. A solution of  $\text{LiClO}_4 \cdot 3\text{H}_2\text{O}$  (690 mg, 4.30 mmol) in EtOH (5 mL) was added and the mixture was stirred for 2 h. The mixture was evaporated to half of its original volume, to give a residue, which was filtered, washed with cold ethanol and recrystallized by slow evaporation from a mixed acetonitrile/ethanol solvent system. Yield: 235 mg (62 %) of brown crystals. M.p. > 258 °C (decomposes without melting). ESI mass spectrometry (Figure S1) reveals the presence of the hydroxo-bridged complex  $[\text{LCo}^{\text{II}}\text{Co}^{\text{III}}(\mu\text{-OH})](\text{ClO}_4)_2$  (**1**), not the anticipated  $[\text{LCo}^{\text{II}}\text{Co}^{\text{III}}(\mu\text{-F})](\text{ClO}_4)_2$  complex, i.e. ESI(+)-MS:  $m/z$  ( $\text{CH}_3\text{CN}$ ) = 902.3  $[\mathbf{1}\text{-ClO}_4]^+$ , 401.7  $[\mathbf{1}\text{-2ClO}_4]^{2+}$

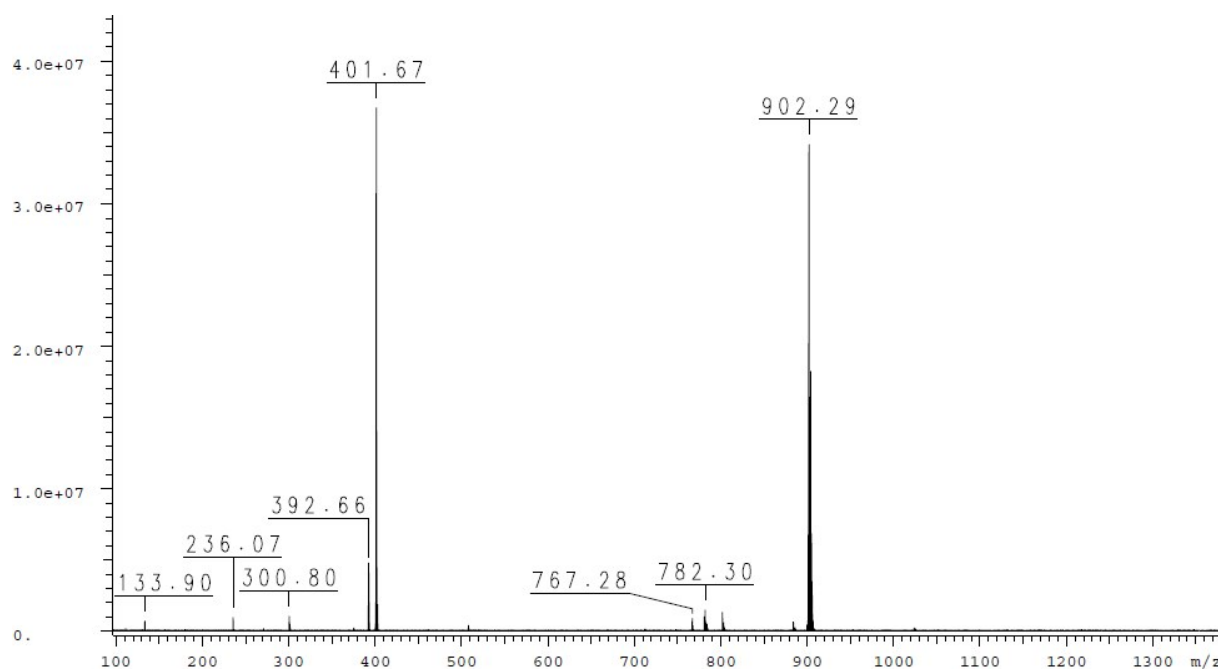

**Figure S1.** ESI-MS spectrum of the above reaction product in MeCN ( $c \sim 10^{-3}$  M). The peak at  $m/z = 902.28$  is due to the  $\{[\text{LCo}^{\text{II}}\text{Co}^{\text{III}}(\mu\text{-OH})]\text{ClO}_4\}^+$  cation.

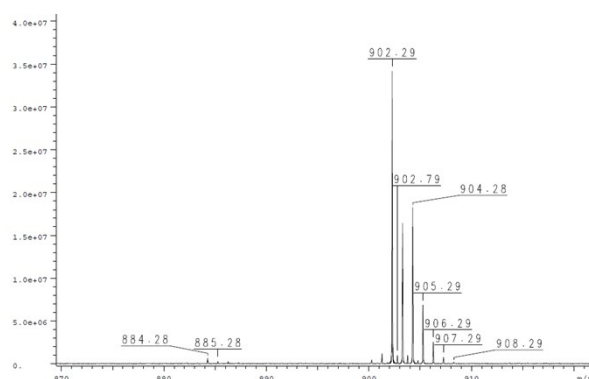

**Figure S2.** Enlarged section of the ESI-MS spectrum shown in Figure S1. The peak at  $m/z = 902.28$  is due to the  $\{[\text{LCo}^{\text{II}}\text{Co}^{\text{III}}(\mu\text{-OH})]\text{ClO}_4\}^+$  cation not a fluoro-bridged species  $\{[\text{LCo}^{\text{II}}\text{Co}^{\text{III}}(\mu\text{-F})]\text{ClO}_4\}^+$ , which would show up (with 100% intensity) at  $m/z = 904.29$ .

**Synthesis and characterization data for  $[\text{LCo}^{\text{II}}\text{Co}^{\text{III}}(\mu\text{-F})(\text{CuBr}_2)]\text{ClO}_4$  (3).** A solution of  $\text{Co}(\text{OAc})_2 \cdot 4\text{H}_2\text{O}$  (43.1 mg, 0.173 mmol, 2.00 eq.) in MeOH (5 mL) was added to a colorless solution of  $\text{H}_2\text{L} \cdot 6\text{HBr}$  (100 mg, 86.5  $\mu\text{mol}$ , 1.00 eq.) in MeOH (30 mL) followed by the base  $\text{NEt}_3$  (70.0 mg, 0.692 mmol, 8.00 eq.). To the resulting brown solution was added an excess of  $\text{N}(n\text{-Bu})_4\text{F} \cdot 3\text{H}_2\text{O}$  (54.6 mg, 0.173 mmol, 2.00 eq.) and the reaction mixture was stirred at room temperature overnight. Then  $\text{Cu}(\text{ClO}_4)_2 \cdot 6\text{H}_2\text{O}$  (32.0 mg, 86.5  $\mu\text{mol}$ , 1.00 eq.) in MeOH was added to the reaction mixture. The resulting dark-brown solution was stirred for 15 min, after which EtOH (20 mL) was added. The mixture was concentrated under reduced pressure, to give a brown precipitate, which was filtered off, and washed with cold EtOH. The crude product was purified twice by recrystallization from a mixed MeCN/EtOH (1:1 by volume) solution and dried in vacuum. Yield: 58 mg (58 %, 50.6  $\mu\text{mol}$ ), brown, microcrystalline powder. M.p.  $> 250$   $^\circ\text{C}$  (decomposes without melting.).  $m/z$  (ESI+, MeCN):  $\text{C}_{38}\text{H}_{64}\text{Br}_2\text{Co}_2\text{CuFN}_6\text{S}_2\text{ClO}_4$

(1125.04)  $[M\text{-ClO}_4^-]^+$  calcd: 1028.09; found 1028.10. IR: (KBr,  $\text{cm}^{-1}$ ):  $\tilde{\nu} = 3271\text{w}$ ,  $3205\text{m}$ ,  $3121\text{w}$  (all  $\nu\text{NH}$ ),  $1089\text{s}$  ( $\nu\text{ClO}_4^-$ ),  $624\text{s}$  ( $\delta\text{ClO}_4^-$ ). Magnetic moment:  $\mu_{\text{eff}} = 4.99 \mu_{\text{B}}$  (at 330 K). UV-vis ( $\text{CH}_3\text{CN}$ ):  $\lambda$  [nm] ( $\epsilon$  [ $\text{M}^{-1}\text{cm}^{-1}$ ]): 201 (106333), 275 (15491), 306 (14501), 557 (1397). Elemental analysis calcd (%) for  $\text{C}_{38}\text{H}_{64}\text{Br}_2\text{ClCo}_2\text{CuFN}_6\text{O}_4\text{S}_2\cdot\text{H}_2\text{O}$  (1128.76 + 18.02): C 39.80, H 5.80, N 7.33; found: C 39.75, H 5.53, N 7.41. Single crystals of  $[\text{LCo}^{\text{II}}\text{Co}^{\text{III}}(\mu\text{-F})(\text{CuBr}_2)]\text{ClO}_4\cdot 2\text{CH}_3\text{CN}$  suitable for X-ray crystallography were obtained by slow evaporation of a mixed acetonitrile/ethanol (1/1 v/v) solution.

**Synthesis and characterization data for  $[\text{LNi}^{\text{II}}_2(\mu\text{-F})(\text{Cu}^{\text{I}}\text{Cl}_2)]$  (4).** *Method A*) A solution of copper(I) chloride (21.8 mg, 0.22 mmol, 2.00 eq.) in MeCN (5 mL) was added to a solution of the nickel complex **2** (99.5 mg, 0.11 mmol, 1.00 eq.) in MeCN (30 mL), to give a dark green suspension which was stirred for further 12 at r.t. after which EtOH (20 mL) was added to the reaction mixture. The resulting solution was concentrated under reduced pressure to give a turquoise precipitate, which was isolated by filtration and washed with cold EtOH. The crude product was purified by recrystallization from a mixed MeCN/EtOH solution, and dried in vacuum. Yield: 66 mg (64 %, 70  $\mu\text{mol}$ ), turquoise, microcrystalline powder. *Method B.* A solution of copper(I) chloride (10.9 mg, 0.110 mmol, 0.11 eq) and  $n\text{Bu}_4\text{NCl}$  (27.8 mg, 0.110 mmol, 0.11 eq) in MeCN (10 mL) was added to a solution of **2** (99.5 mg, 0.110 mmol, 1.00 eq.) in MeCN (30 mL). After stirring for 12 at r.t., EtOH (25 mL) was added. The resulting solution was concentrated under reduced pressure to give a turquoise precipitate, which was isolated by filtration and washed with cold EtOH. The crude product was purified twice by recrystallization from a mixed MeCN/EtOH solution, and dried in vacuum to give 58 mg (52 %, 62  $\mu\text{mol}$ ) of a turquoise, microcrystalline powder. M.p.  $>332^\circ\text{C}$  (decomposes without melting).  $m/z$  (ESI+, MeCN):  $\text{C}_{38}\text{H}_{64}\text{CuFCl}_2\text{N}_6\text{Ni}_2\text{S}_2$  (936.200),  $[\text{M}+\text{H}]^+$  calcd: 937.20; found 937.21;  $[\text{M}-\text{Cl}]^+$  calcd: 901.23, found 901.2,  $[\text{M}-\text{CuCl}_2]^+$  calcd: 803.33, found 803.3. IR (KBr,  $\text{cm}^{-1}$ ):  $\tilde{\nu} = 3447$  (w), 3285 (w,  $\nu\text{NH}$ ), 3256 (w,  $\nu\text{NH}$ ), 2965 (m), 2951 (m), 2925 (m), 2862 (m), 2815 (w), 1742 (w), 1651 (m), 1462 (m), 1447 (m), 1416 (w), 1392 (w), 1362 (m), 1300 (w), 1282 (w), 1228 (w), 1204 (w), 1189 (w), 1158 (m), 1087 (m), 1065 (m), 1054 (m), 1016 (w), 981 (m), 943 (w), 925 (w), 904 (w), 872 (m), 851 (w), 816 (m), 755 (w), 674 (w), 624 (m), 550 (w), 497 (w). Magnetic moment:  $\mu_{\text{eff}} = 4.35 \mu_{\text{B}}$  (at 330 K),  $\mu_{\text{eff,max}} = 4.63 \mu_{\text{B}}$  (at 14 K). UV-vis ( $\text{CH}_3\text{CN}/\text{CH}_3\text{CH}_2\text{OH}$  1:1 v/v):  $\lambda$  [nm] ( $\epsilon$  [ $\text{M}^{-1}\text{cm}^{-1}$ ]): 204 (95327), 280 (12173), 324 (6925), 611 (1194), 1014 (511). Elemental analysis calcd (%) for  $\text{C}_{38}\text{H}_{64}\text{CuFCl}_2\text{N}_6\text{Ni}_2\text{S}_2\cdot 2\text{H}_2\text{O}$  (939.92 + 36.03): C 46.77, H 7.02, N 8.61; found: C 46.53, H 6.79, N 8.43.

**Synthesis and characterization data for  $[\text{LNi}_2(\mu\text{-F})(\text{CuBr}_2)]$  (5).** *Method A*) A solution of copper(I) bromide (31.6 mg, 0.22 mmol, 2.00 eq.) in MeCN (5 mL) was added to a solution of **2** (99.5 mg, 0.11 mmol, 1.00 eq.) in MeCN (30 mL), to give a green suspension which was stirred for further 12 at r.t. after which EtOH (20 mL) was added to the reaction mixture. The resulting solution was concentrated under reduced pressure to give a turquoise precipitate, which was isolated by filtration and washed with cold EtOH. The crude product was purified by recrystallization from a mixed MeCN/EtOH solution, and dried in vacuum. Yield: 106 mg (93 %, 0.103 mmol), turquoise, microcrystalline powder. *Method B.* A solution of copper(I) bromide (15.8 mg, 0.11 eq) and  $n\text{Bu}_4\text{NBr}$  (35.5 mg, 0.11 eq) in MeCN (10 mL) was added to a solution of **2** (99.5 mg, 0.11 mmol, 1.0 eq) in MeCN (30 mL). After stirring for 12 at r.t., EtOH (25 mL) was added. The resulting solution was concentrated under reduced pressure to give a turquoise precipitate, which was isolated by filtration and washed with cold EtOH. The crude product was purified twice by recrystallization from a mixed MeCN/EtOH solution, and dried in vacuum to give 73 mg (65 %, 0.071 mmol) of a turquoise, microcrystalline powder. M.p.  $>329^\circ\text{C}$  (decomposes without melting).  $m/z$  (ESI+, MeCN):  $\text{C}_{38}\text{H}_{64}\text{Br}_2\text{CuFN}_6\text{Ni}_2\text{S}_2$  (1024.10),

[M]<sup>+</sup> calcd: 1024.1; found 1024.1; [M-Br]<sup>+</sup> calcd: 947.18, found 947.2, [M-CuBr<sub>2</sub>]<sup>+</sup> calcd 803.3; found 903.3. IR (KBr, cm<sup>-1</sup>):  $\tilde{\nu}$  = 3445 (m), 3282 (m, νNH), 3250 (m, νNH), 2962 (s), 2932 (m), 2905 (m), 2868 (s), 2818 (m), 1628 (w), 1597 (m), 1477 (m), 1463 (s), 1446 (s), 1417 (w), 1377 (w), 1363 (m), 1301 (w), 1229 (m), 1187 (m), 1159 (m), 1118 (m), 1086 (m), 1059 (m), 1015 (w), 1002 (w), 982 (m), 943 (w), 927 (w), 899 (w), 875 (m), 851 (w), 819 (w), 754 (w), 624 (m), 556 (w), 499 (w), 469 (w), 440 (w). Magnetic moment:  $\mu_{\text{eff}} = 4.16 \mu_{\text{B}}$  (at 330 K),  $\mu_{\text{eff,max}} = 4.54 \mu_{\text{B}}$  (at 14 K). UV-vis (CH<sub>3</sub>CN/CH<sub>3</sub>CH<sub>2</sub>OH):  $\lambda$  [nm] ( $\epsilon$  [M<sup>-1</sup> cm<sup>-1</sup>]): 205 (178995), 279 (13323), 317 (9836), 614 (744), 1019 (398). Elemental analysis calcd (%) for C<sub>38</sub>H<sub>64</sub>Br<sub>2</sub>CuFN<sub>6</sub>Ni<sub>2</sub>S<sub>2</sub>·6H<sub>2</sub>O (1028.82 + 108.09): C 40.14, H 6.74, N 7.39; found: C 40.24, H 6.34, N 7.39.

**Compound 8. Synthesis and characterization data for [LNi<sub>2</sub>(μ-F)(CuI<sub>2</sub>)] (6).** *Method A* A solution of copper(I) iodide (41.9 mg, 0.22 mmol, 2.0 eq.) in MeCN (5 mL) was added to a solution of **2** (99.5 mg, 0.11 mmol, 1.0 eq.) in MeCN (30 mL), to give a green suspension which was stirred for further 12 at r.t. after which EtOH (20 mL) was added to the reaction mixture. The resulting solution was concentrated under reduced pressure to give a turquoise precipitate, which was isolated by filtration and washed with cold EtOH. The crude product was purified by recrystallization from a mixed MeCN/EtOH solution, and dried in vacuum. Yield: 62 mg (50 %, 55.2 μmol), turquoise, microcrystalline powder. *Method B.* A solution of copper(I) iodide (20.9 mg, 0.11 eq) and *n*Bu<sub>4</sub>NI (40.6 mg, 0.11 eq) in MeCN (10 mL) was added to a solution of **2** (99.5 mg, 0.11 mmol, 1.0 eq) in MeCN (30 mL). After stirring for 12 at r.t., EtOH (25 mL) was added. The resulting solution was concentrated under reduced pressure to give a turquoise precipitate, which was isolated by filtration and washed with cold EtOH. The crude product was purified twice by recrystallization from a mixed MeCN/EtOH solution, and dried in vacuum to give 58 mg (47 %, 0.052 mmol) of a turquoise, microcrystalline powder. M.p. >280°C (decomposes without melting). *m/z* (ESI+, MeCN): C<sub>38</sub>H<sub>64</sub>CuFI<sub>2</sub>N<sub>6</sub>Ni<sub>2</sub>S<sub>2</sub> (1120.071), [M+H<sub>2</sub>O+H]<sup>+</sup> calcd: 1139.089; found 1139.8; [M+H]<sup>+</sup> calcd: 1121.08, found 1121.08, [M-I]<sup>+</sup> calcd 995.167; found 995.2. IR (KBr, cm<sup>-1</sup>):  $\tilde{\nu}$  = 3443 (m), 3283 (m, νNH), 3238 (m, νNH), 2963 (s), 2930 (m), 2865 (s), 2817 (m), 1626 (w), 1477 (m), 1462 (s), 1446 (s), 1416 (w), 1393 (w), 1376 (w), 1362 (m), 1300 (m), 1281 (m), 1273 (m), 1228 (m), 1187 (w), 1158 (m), 1119 (m), 1085 (s), 1053 (m), 1014 (w), 1002 (w), 981 (m), 942 (w), 925 (w), 899 (w), 872 (m), 817 (w), 755 (w), 675 (w), 623 (m). Magnetic moment:  $\mu_{\text{eff}} = 4.51 \mu_{\text{B}}$  (at 330 K),  $\mu_{\text{eff,max}} = 4.92 \mu_{\text{B}}$  (at 14 K). UV-vis (CH<sub>3</sub>CN/CH<sub>3</sub>CH<sub>2</sub>OH):  $\lambda$  [nm] ( $\epsilon$  [M<sup>-1</sup> cm<sup>-1</sup>]): 203 (115108), 280 (19233), 317 (14709), 618 (248), 1021 (152). Elemental analysis calcd (%) for C<sub>38</sub>H<sub>64</sub>CuFI<sub>2</sub>N<sub>6</sub>Ni<sub>2</sub>S<sub>2</sub>·2H<sub>2</sub>O (1122.83 + 36.03): C 39.39, H 5.91, N 7.25; found: C 39.62, H 5.55, N 7.21. Crystals of [LNi<sub>2</sub>(μ-F)(CuI<sub>2</sub>)]·2CH<sub>3</sub>CN (**6**·2MeCN) were obtained by slow evaporation of a mixed acetonitrile/ethanol (1/1 v/v) solution of the complex.

## 2) Characterization of new compounds by mass spectrometry

**a) ESI mass spectrometry for  $[\text{LCo}_2(\mu\text{-F})(\text{CuBr}_2)]\text{ClO}_4$  (**3**).** The ESI mass spectrum of a dilute MeCN solution of **3** (Figure S3) reveals a molecular ion peak at  $m/z = 1028.1$  attributable to the  $[\text{LCo}^{\text{II}}\text{Co}^{\text{III}}(\mu\text{-F})(\text{CuBr}_2)]^+$  cation (see Figure S4 for an enlarged section of the spectrum). The more intense peaks at  $m/z = 886.2$  and  $904.3$  can be assigned to a  $[\text{LCo}^{\text{II}}\text{Co}^{\text{II}}](\text{ClO}_4)^+$  and a  $[\text{LCo}^{\text{II}}\text{Co}^{\text{III}}(\mu\text{-F})](\text{ClO}_4)^+$  cation, respectively.

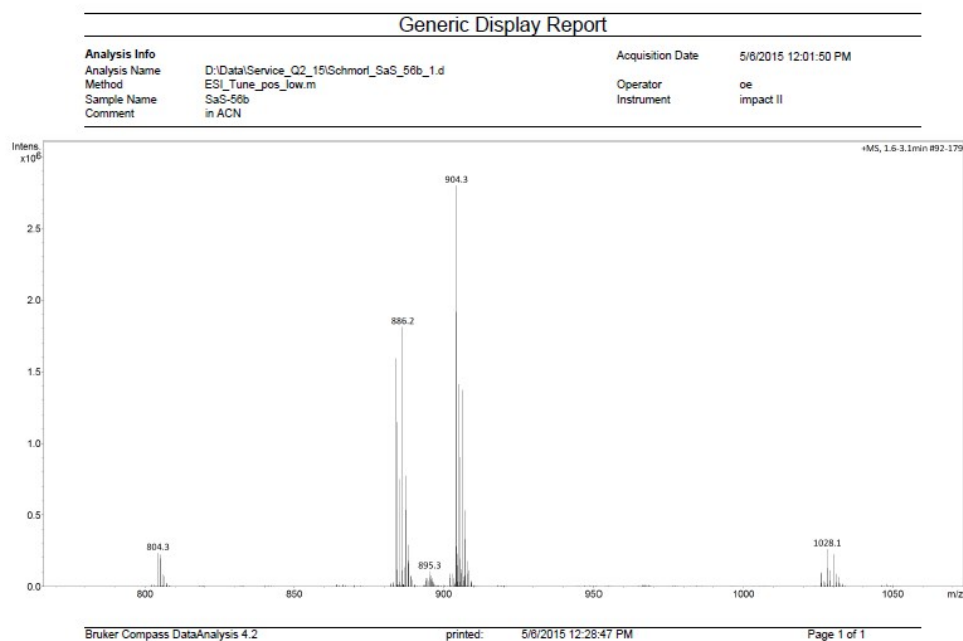

**Figure S3.** ESI-MS spectrum for  $[\text{LCo}_2(\mu\text{-F})(\text{CuBr}_2)]\text{ClO}_4$  (**3**) in MeCN ( $c \sim 10^{-3}$  M).

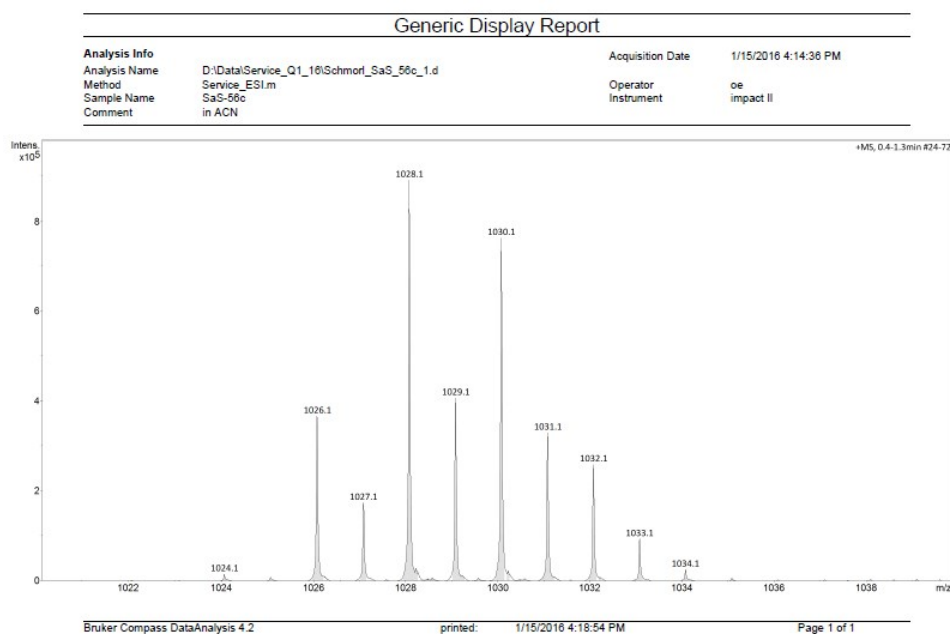

**Figure S4.** Section of the ESI-MS spectrum for  $[\text{LCo}_2(\mu\text{-F})(\text{CuBr}_2)]\text{ClO}_4$  (**3**) ( $c \sim 10^{-3}$  M).

**b) ESI mass spectrometry for  $[\text{LNi}_2(\mu\text{-F})(\text{CuCl}_2)]$  (**4**).** The ESI mass spectrum of a dilute MeCN solution of **4** (Figure S5) reveals a molecular ion peak at  $m/z = 936.2$  attributable to a  $[\text{LNi}^{\text{II}}\text{Ni}^{\text{III}}(\mu\text{-F})(\text{Cu}^{\text{I}}\text{Cl}_2)]^+$  cation (see Figure S6 or S7 for enlarged sections of the ESI mass spectrum). The more intense peaks at  $m/z = 803.3$  and  $901.2$  can be assigned to  $[\text{LNi}^{\text{II}}\text{Ni}^{\text{II}}(\mu\text{-F})]^+$  and  $[\text{LNi}^{\text{II}}\text{Ni}^{\text{II}}(\mu\text{-F})(\text{Cu}^{\text{I}}\text{Cl})]^+$  cations, respectively.

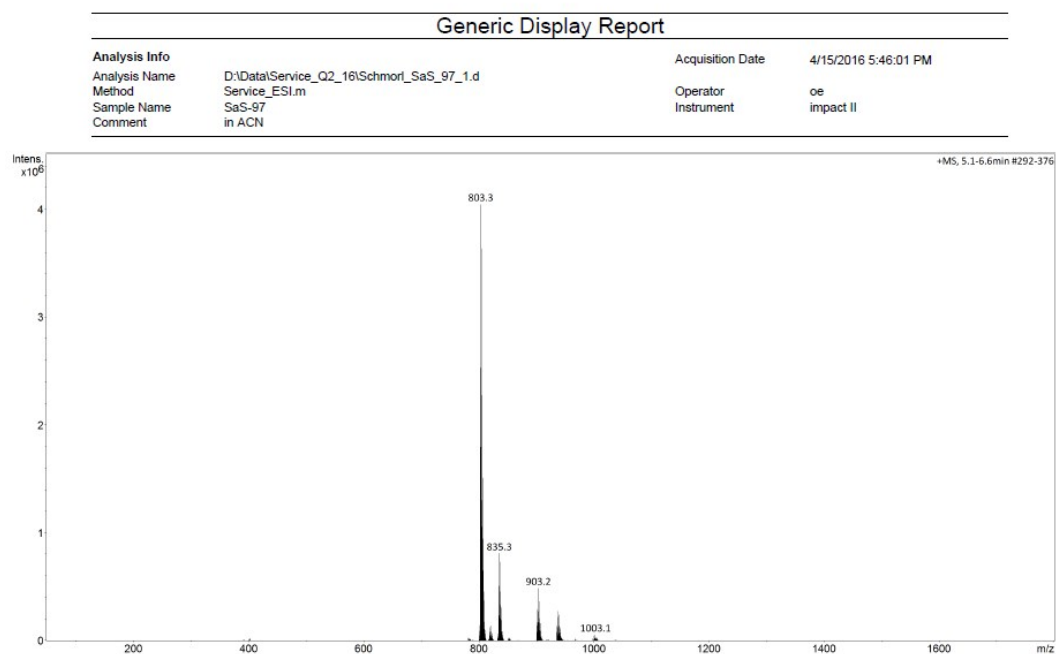

**Figure S5.** ESI-MS spectrum for  $[\text{LNi}_2(\mu\text{-F})(\text{CuCl}_2)]$  (**4**) in MeCN ( $c \sim 10^{-3}$  M).

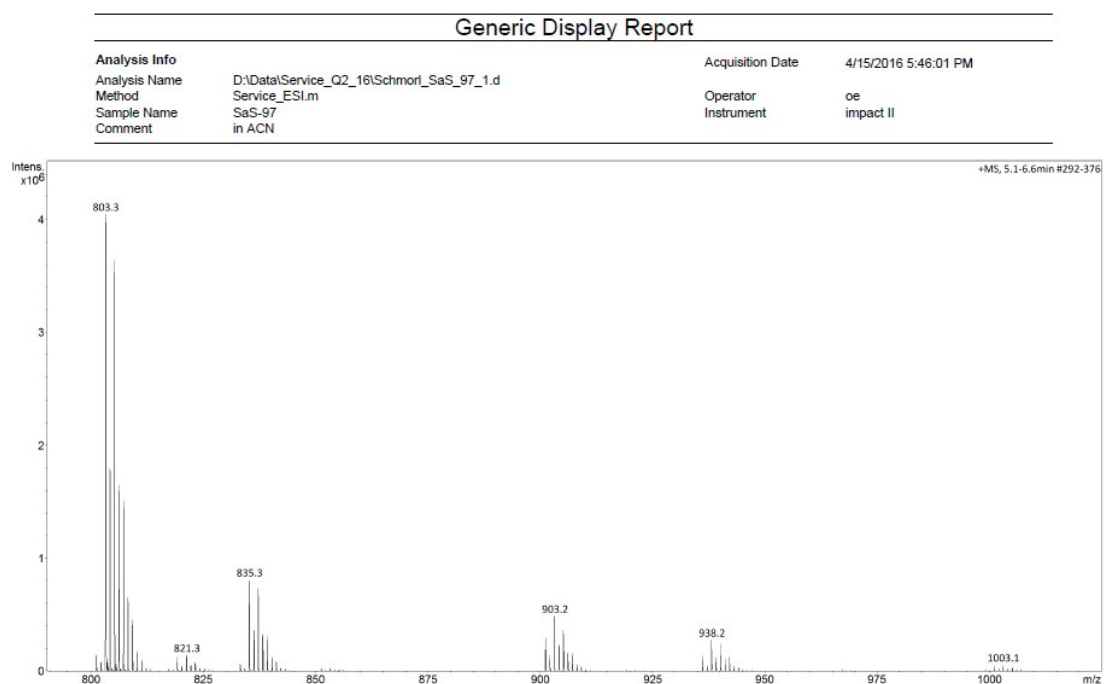

**Figure S6.** Section of the ESI-MS spectrum for  $[\text{LNi}_2(\mu\text{-F})(\text{CuCl}_2)]$  (**4**) ( $c \sim 10^{-3}$  M).



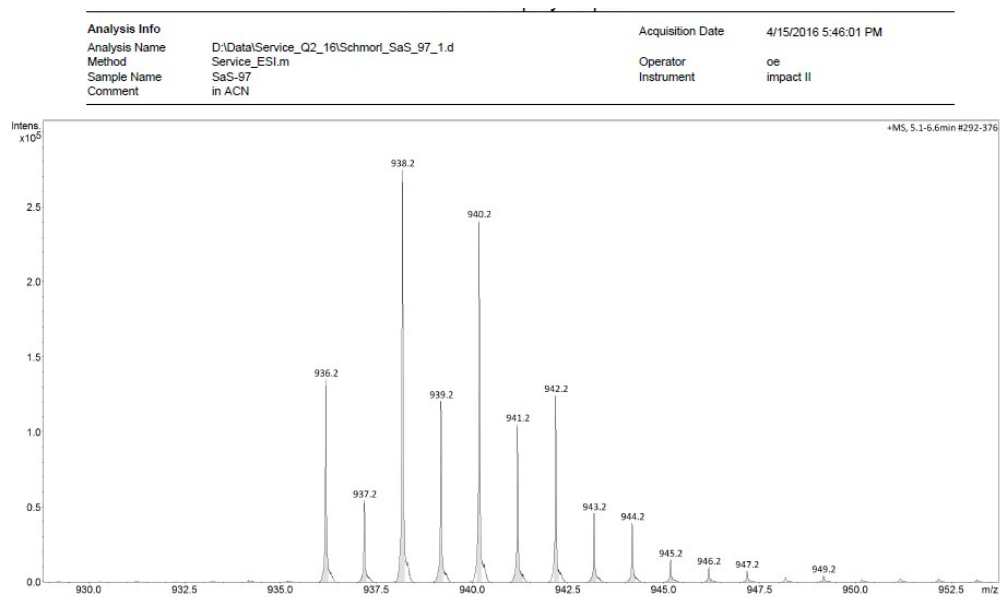

**Figure S7.** Section of the ESI-MS spectrum for  $[\text{LNi}_2(\mu\text{-F})(\text{CuCl}_2)]$  (**4**) ( $c \sim 10^{-3}$  M).

**c) ESI mass spectrometry for  $[\text{LNi}_2(\mu\text{-F})(\text{CuBr}_2)]$  (**5**).** The ESI mass spectrum of a dilute MeCN solution of **5** (Figure S8) reveals a molecular ion peak at  $m/z = 1028.2$  attributable to a  $[\text{LNi}^{\text{II}}\text{Ni}^{\text{III}}(\mu\text{-F})(\text{Cu}^{\text{I}}\text{Br}_2)]^+$  cation (see Figure S9-S11 for an enlarged section of the spectrum,  $E^{0/2}(\text{Ni}^{\text{II}}\text{Ni}^{\text{III}}/\text{Ni}^{\text{II}}\text{Ni}^{\text{II}}) = +0.26$  V vs SCE). The more intense peaks at  $m/z = 803.3$  and  $947.2$  can be assigned to a  $[\text{LNi}^{\text{II}}\text{Ni}^{\text{II}}(\mu\text{-F})]^+$  cation and a  $[\text{LNi}^{\text{II}}\text{Ni}^{\text{II}}(\mu\text{-F})(\text{Cu}^{\text{I}}\text{Br})]^+$  cation, respectively.

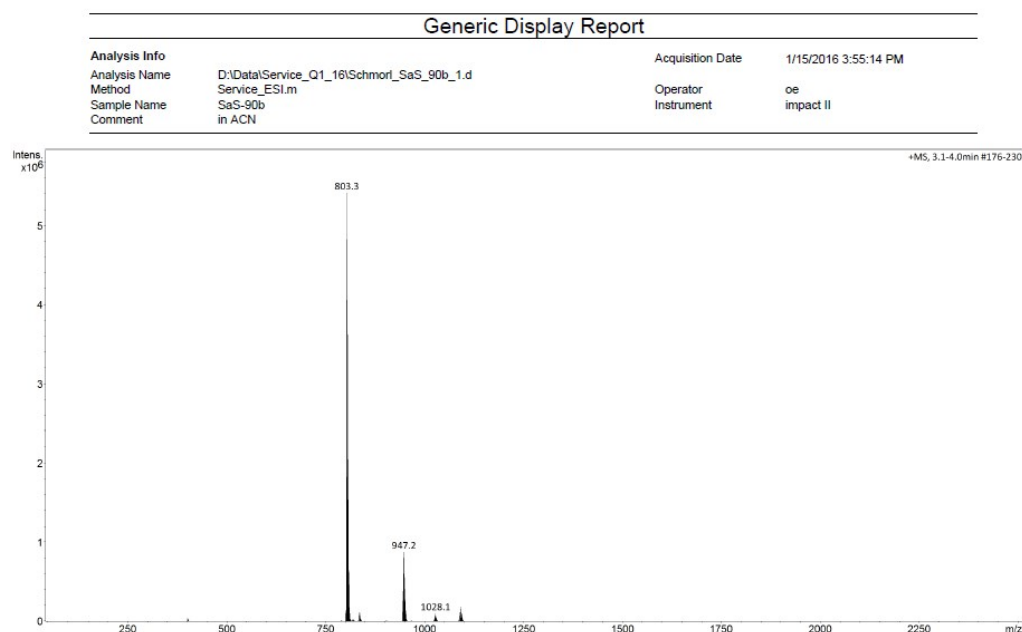

**Figure S8.** ESI-MS spectrum for  $[\text{LNi}_2(\mu\text{-F})(\text{CuBr}_2)]$  (**5**) in MeCN ( $c \sim 10^{-3}$  M).

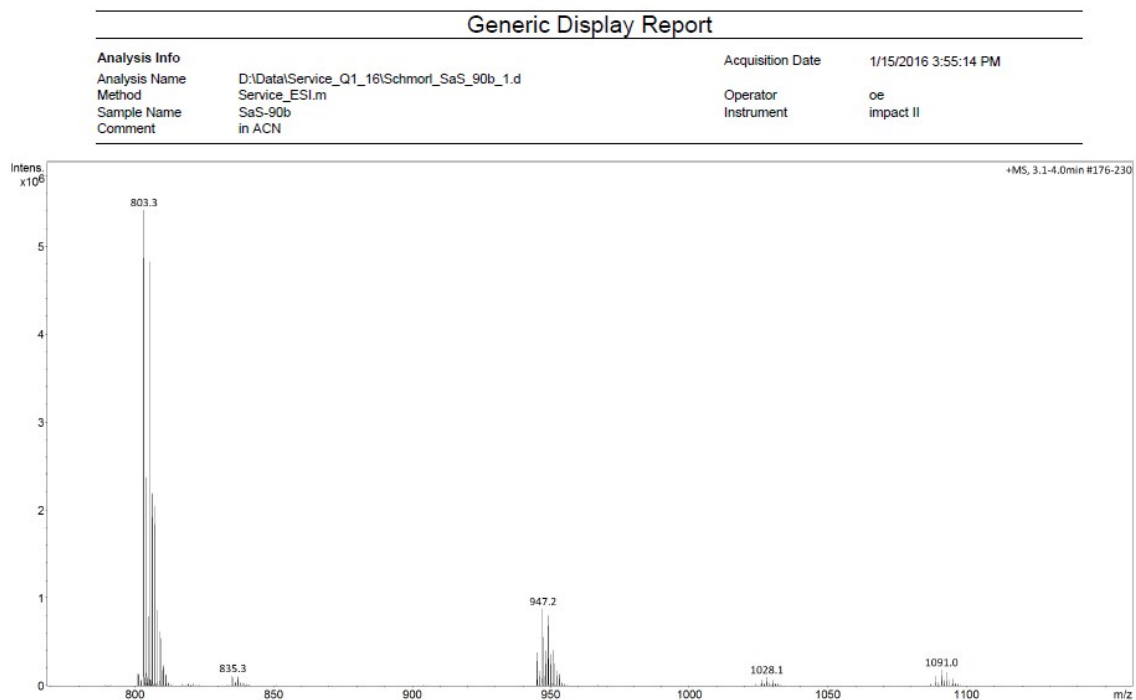

**Figure S9.** Section of the ESI-MS spectrum for  $[\text{LNi}_2(\mu\text{-F})(\text{CuBr}_2)]$  (**5**) ( $c \sim 10^{-3}$  M).

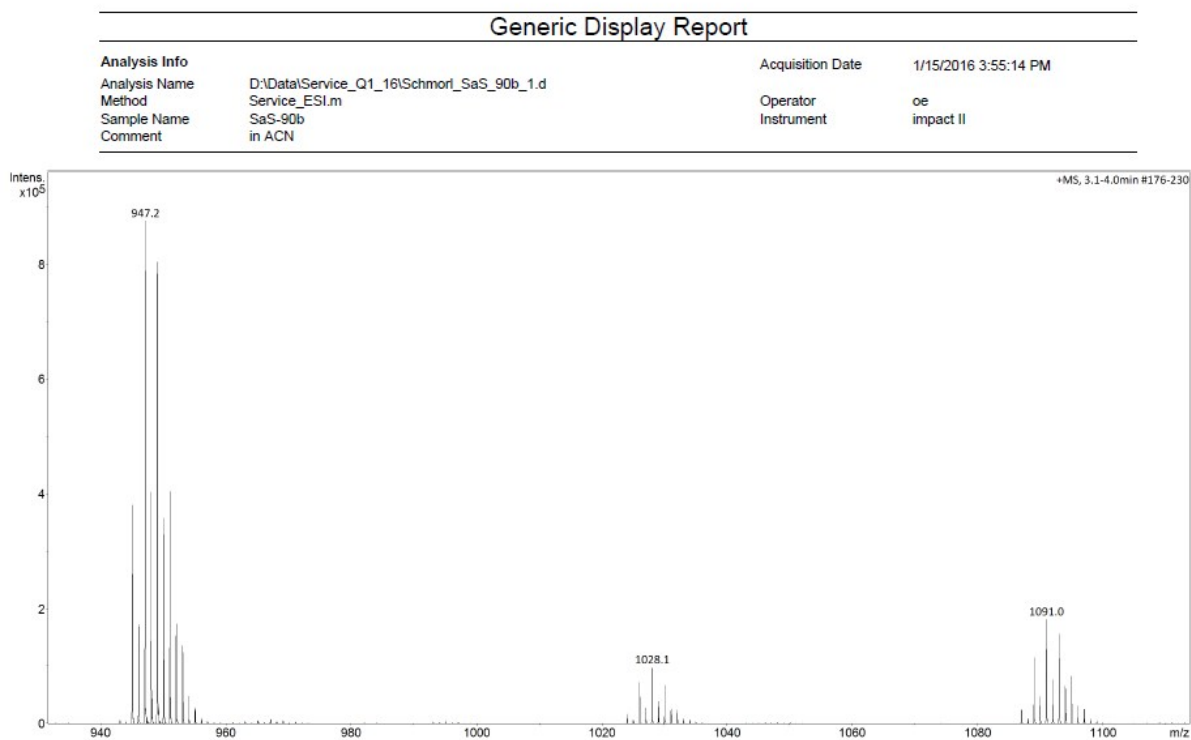

**Figure S10.** Section of the ESI-MS spectrum for  $[\text{LNi}_2(\mu\text{-F})(\text{CuBr}_2)]$  (**5**) ( $c \sim 10^{-3}$  M).

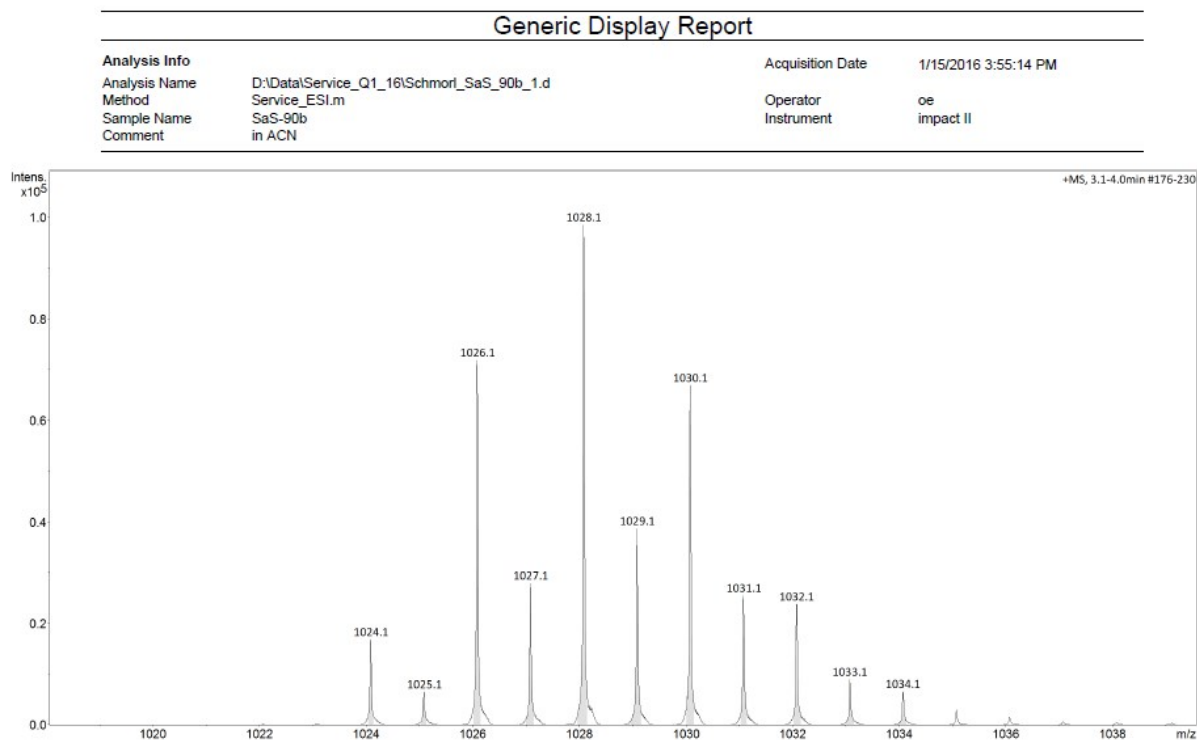

**Figure S11.** Section of the ESI-MS spectrum for  $[\text{LNi}_2(\mu\text{-F})(\text{CuBr}_2)]$  (**5**) ( $c \sim 10^{-3}$  M).

**d) ESI mass spectrometry for  $[\text{LNi}_2(\mu\text{-F})(\text{CuI}_2)]$  (**6**).** The  $^+$ ESI mass spectrum of a dilute MeCN solution of **6** (Figure S12) reveals a weak peak at  $m/z = 1122.08$  attributable to a  $[\text{LNi}^{\text{II}}\text{Ni}^{\text{III}}(\mu\text{-F})(\text{CuI}_2)]^+$  cation (see Figure S13, S14 for an enlarged section of the spectrum). The more intense peaks at  $m/z = 803.3$  and 995.2 can be assigned to a  $[\text{LNi}^{\text{II}}\text{Ni}^{\text{II}}(\mu\text{-F})]^+$  cation and a  $[\text{LNi}^{\text{II}}\text{Ni}^{\text{II}}(\mu\text{-F})(\text{CuI})]^+$  cation, respectively

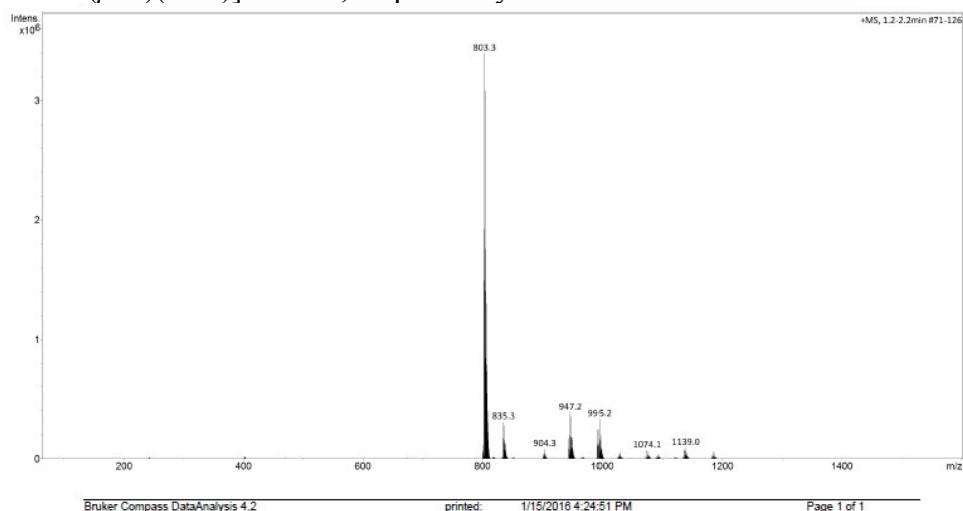

**Figure S12.** ESI-MS spectrum of a  $10^{-3}$  M solution of  $[\text{LNi}_2(\mu\text{-F})(\text{CuI}_2)]$  (**6**) in MeCN.

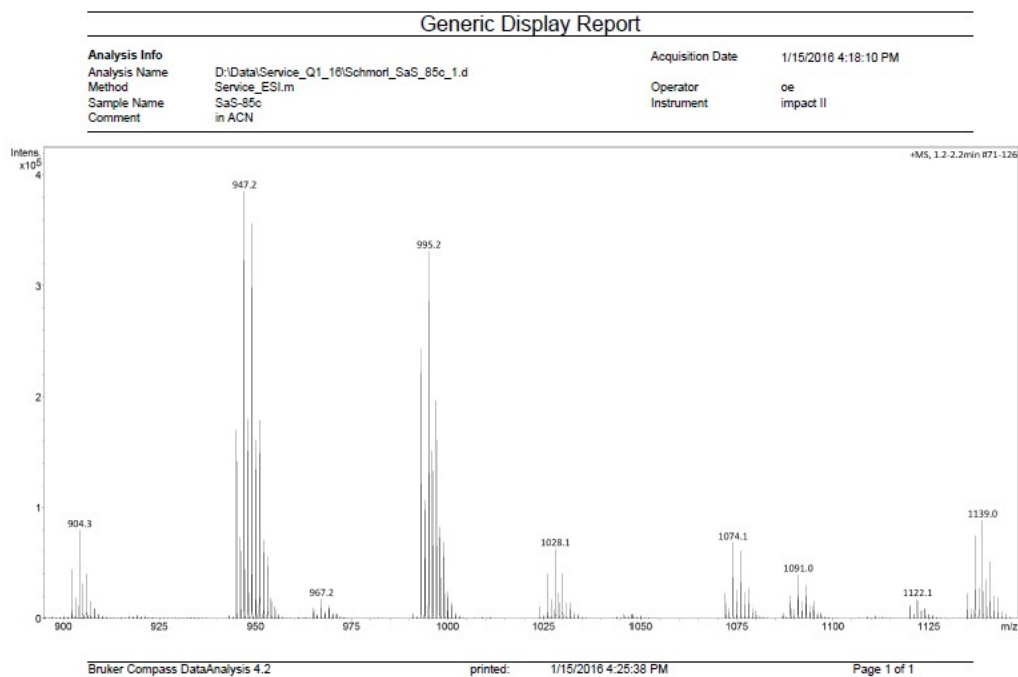

**Figure S13.** Section of the ESI-MS spectrum of  $[\text{LNi}_2(\mu\text{-F})(\text{CuI}_2)]$  (**6**) in MeCN.

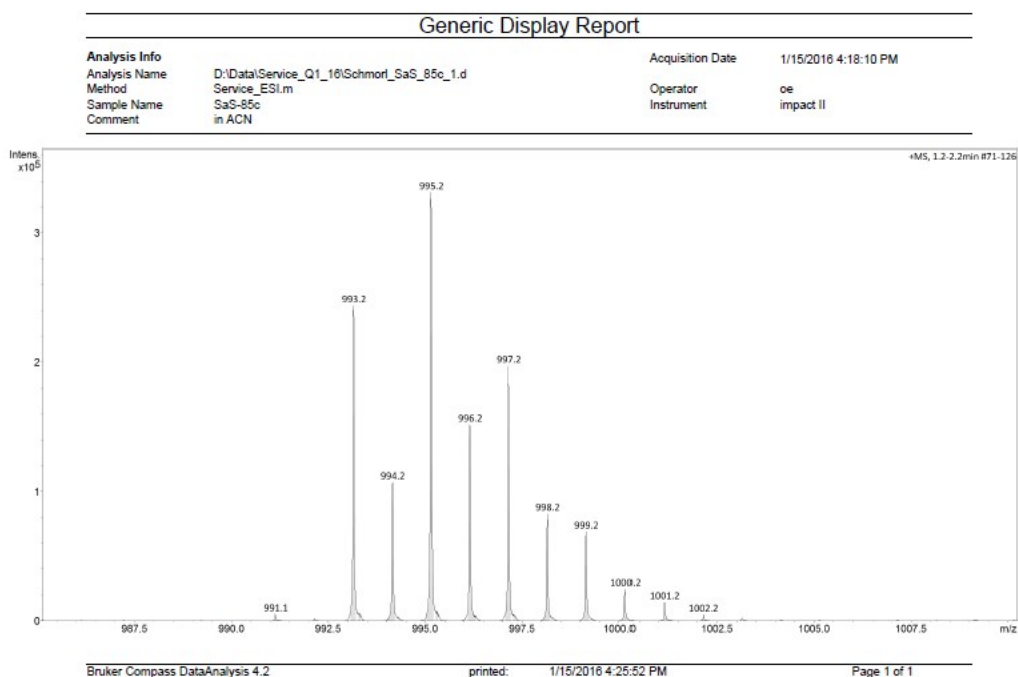

**Figure S14.** Section of the ESI-MS spectrum of a dilute solution of  $[\text{LNi}_2(\mu\text{-F})(\text{CuI}_2)]$  (**6**) in MeCN ( $c \sim 10^{-3}$  M)

### 3) Characterization of compounds 3-6 by infrared spectroscopy

All compounds have been investigated by FT-IR spectroscopy. The ATR-FTIR spectra of **3-6** are shown in Figures S15-S18. Overlays of the FT-IR spectra are provided in Figure 1 (for **1** and **3**), Figure 3 and Figure S18 (for **2** and **6**), and Figure S19 (for **4-6**), respectively. Table S1 lists the data and their assignments.

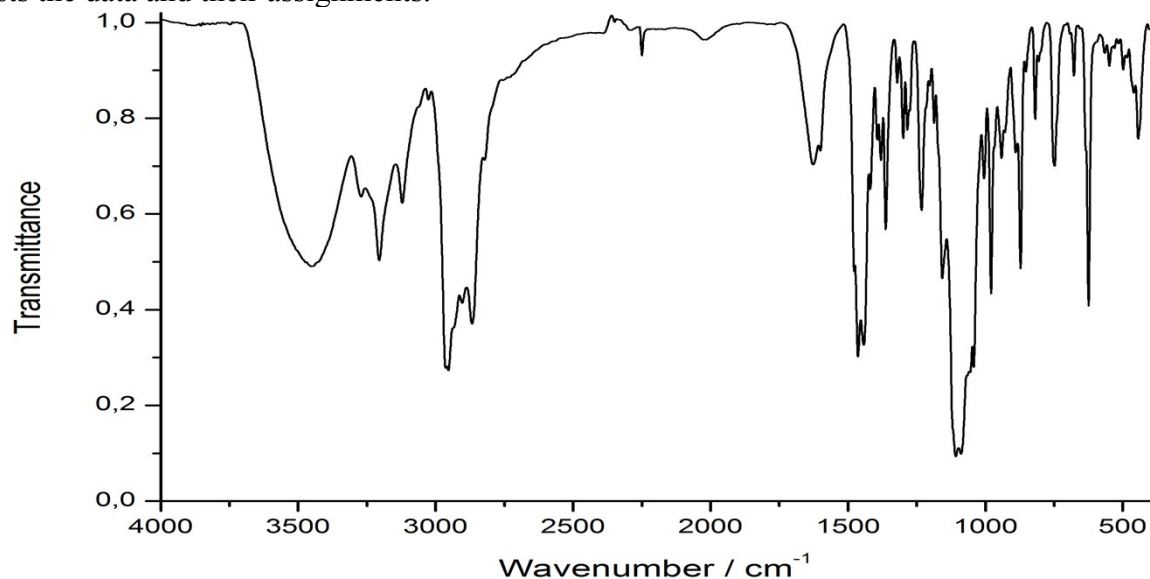

**Figure S15.** ATR IR spectrum of  $[\text{LCO}_2(\mu\text{-F})(\text{CuBr}_2)]\text{ClO}_4$  (**3**).

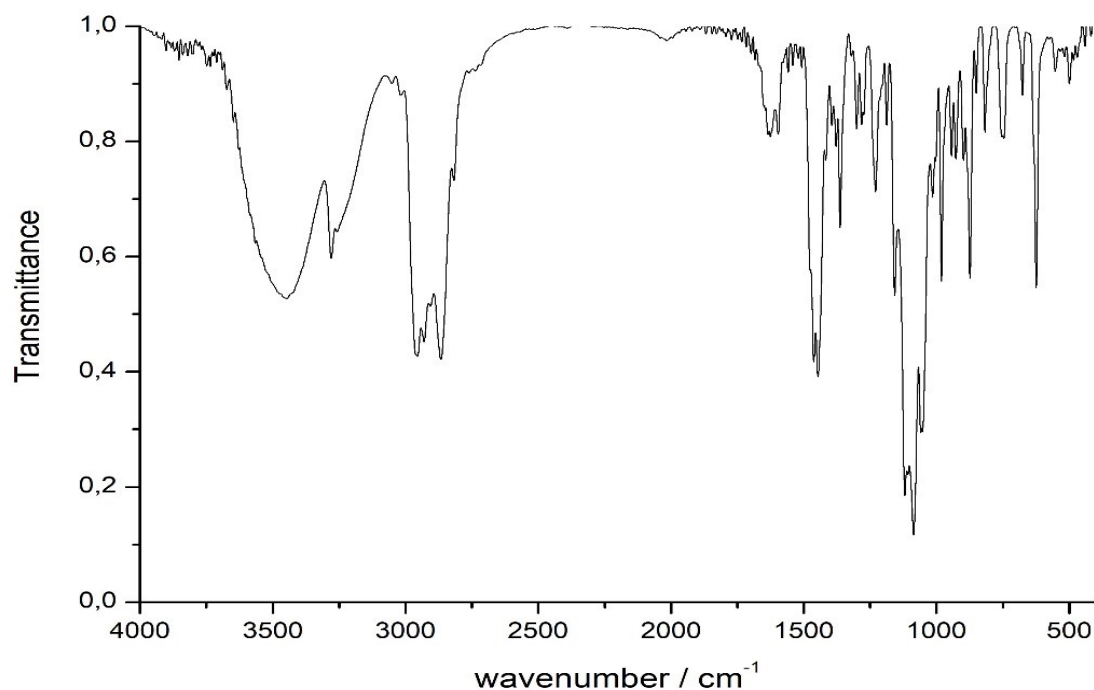

**Figure S16.** ATR IR spectrum of  $[\text{LNi}_2(\mu\text{-F})(\text{CuCl}_2)]$  (**4**).

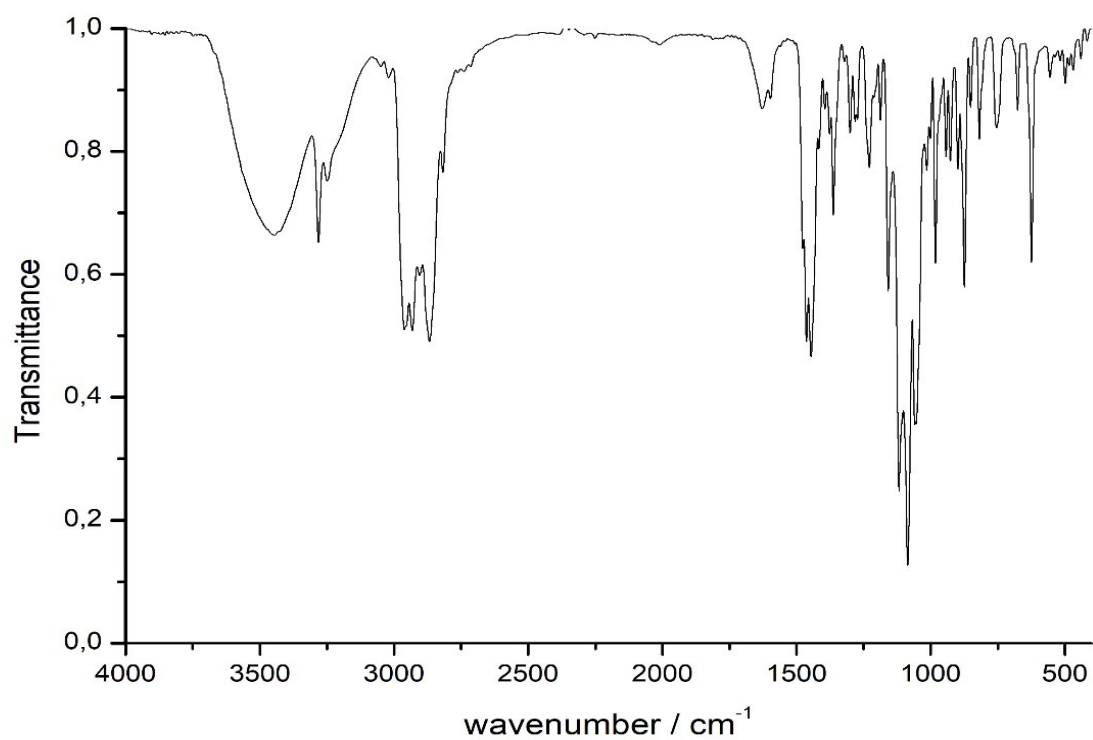

**Figure S17.** ATR IR spectrum of [LNi<sub>2</sub>(μ-F)(CuBr<sub>2</sub>)] (5).

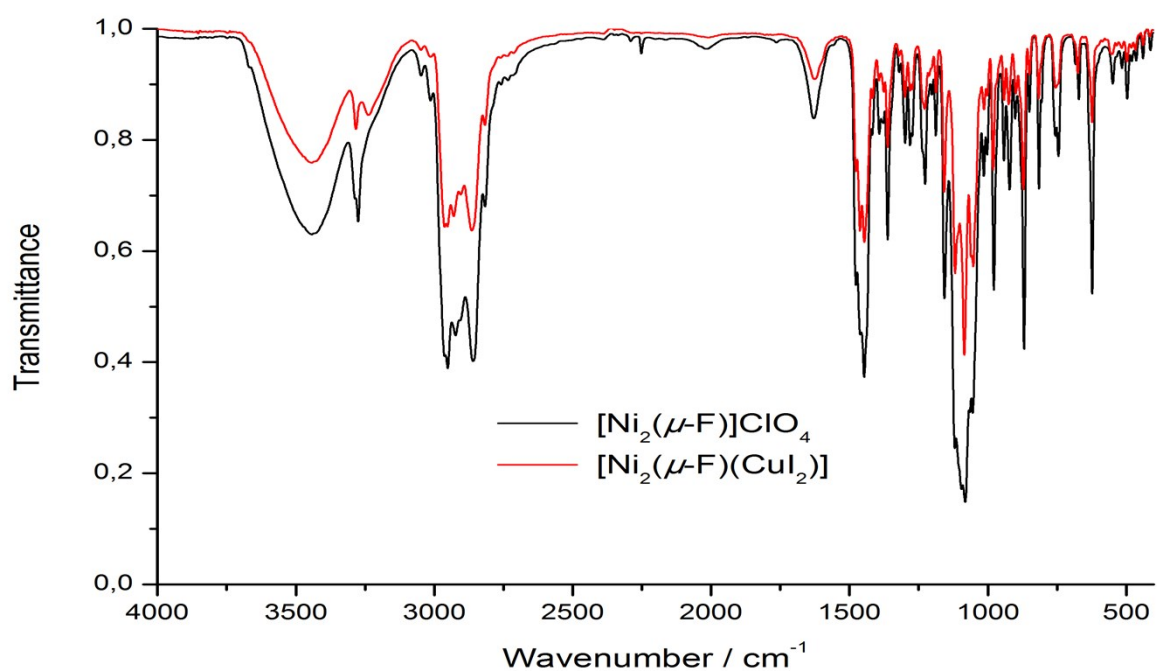

**Figure S18.** ATR IR spectra for [LNi<sub>2</sub>(μ-F)]ClO<sub>4</sub> (2) and for [LNi<sub>2</sub>(μ-F)(CuI<sub>2</sub>)] (6).

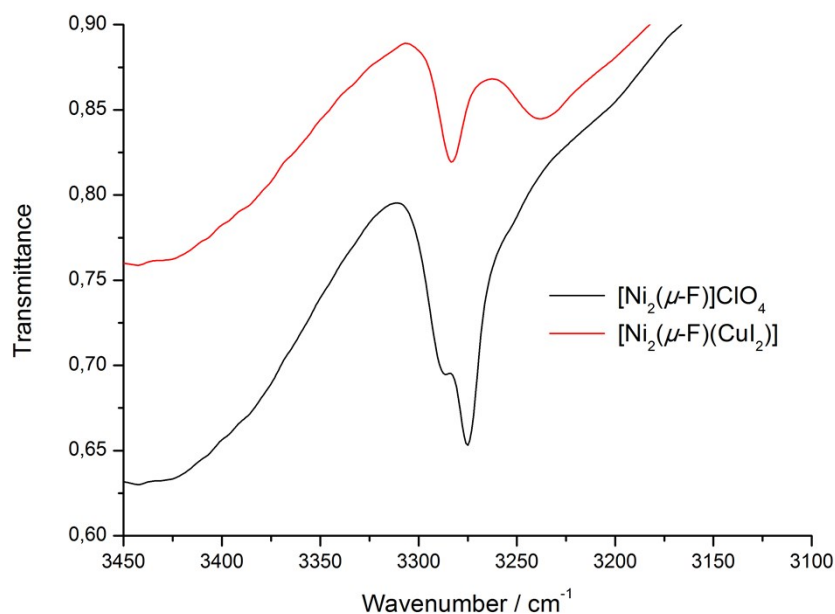

**Figure S19.** Overlay of ATR IR spectra for  $[\text{LNi}_2(\mu\text{-F})]\text{ClO}_4$  (**2**) and for  $[\text{LNi}_2(\mu\text{-F})(\text{CuI}_2)]$  (**6**) ( $\nu(\text{NH})$  region).

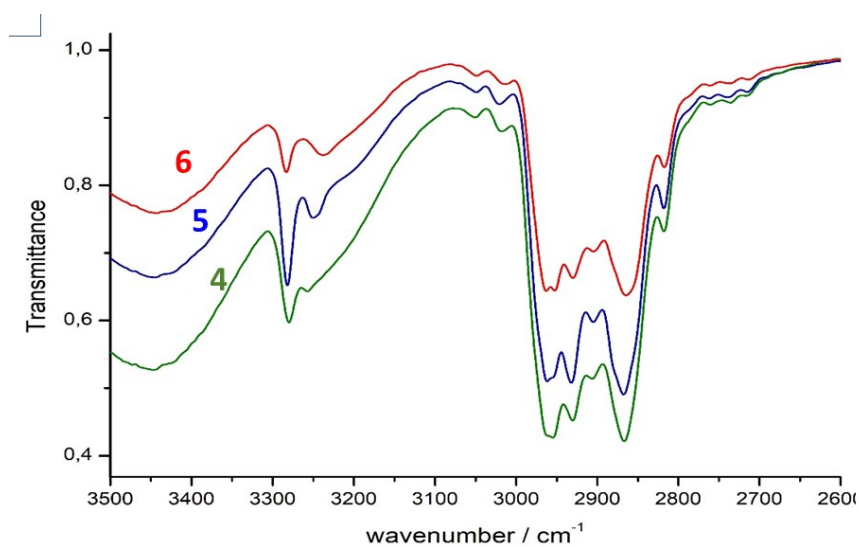

**Figure S20.** Overlay of ATR-FTIR spectra for  $[\text{LNi}_2(\mu\text{-F})(\text{CuCl}_2)]$  (**4**),  $[\text{LNi}_2(\mu\text{-F})(\text{CuBr}_2)]$  (**5**) and  $[\text{LNi}_2(\mu\text{-F})(\text{CuI}_2)]$  (**6**) in the  $3500\text{-}2600\text{ cm}^{-1}$  region.

**Table S1.** Selected analytical data for [LNi<sub>2</sub>(μF)]ClO<sub>4</sub> (**2**) and [LNi<sub>2</sub>(μF)(CuX<sub>2</sub>)] (X = Cl (**4**), Br (**5**), I (**6**)).

|                                       | <b>2</b>    | <b>4</b> (X = Cl) | <b>5</b> (X = Br) | <b>6</b> (X = I) | assignment                                                                     |
|---------------------------------------|-------------|-------------------|-------------------|------------------|--------------------------------------------------------------------------------|
| UV-vis <sup>a)</sup>                  | 204 (60326) | 204 (95327)       | 205 (158995)      | 203 (115108)     | π-π*                                                                           |
| λ/nm                                  | 283 (15118) | 280 (12173)       | 279 (13323)       | 280 (19233)      |                                                                                |
| (ε/M <sup>-1</sup> cm <sup>-1</sup> ) | 450 (sh)    | 450 (sh)          | 450 (sh)          | 450 (sh)         | RS <sup>-</sup> →M CT                                                          |
|                                       | 631 (50)    | 611 (1194)        | 614 (744)         | 618 (248)        | ν <sub>2</sub> ( <sup>3</sup> A <sub>2g</sub> → <sup>3</sup> T <sub>1g</sub> ) |
|                                       | 1021 (50)   | 1014 (511)        | 1019 (398)        | 1021 (152)       | ν <sub>1</sub> ( <sup>3</sup> A <sub>2g</sub> → <sup>3</sup> T <sub>1g</sub> ) |
| FT-IR <sup>b)</sup>                   | 3275        | 3285              | 3282              | 3283             | ν(NH)                                                                          |
| v / cm <sup>-1</sup>                  | -           | 3256              | 3250              | 3238             | ν(NH...X)                                                                      |

a) MeCN/EtOH (1:1 v/v), 10<sup>-3</sup> M (vis-NIR region), 10<sup>-5</sup> M (UV region). b) ATR mode.

**4) Characterization of compounds 3 and 6 by X-ray crystallography.** Single crystals of [LCo<sup>II</sup>Co<sup>III</sup>(μ-F)(CuBr<sub>2</sub>)](ClO<sub>4</sub>)·2MeCN (**3**·2MeCN) and [LNi<sup>II</sup><sub>2</sub>(μ-F)(CuI<sub>2</sub>)]·2MeCN (**6**·2MeCN) were selected and mounted on the tip of a glass fibre using perfluoropolyether oil. The data sets were collected at 180(2) K using a STOE IPDS-2 (for **3**·2MeCN) or STOE IPDS-1 diffractometer (for **6**·2MeCN) both equipped with graphite monochromated Mo-K<sub>α</sub> radiation (λ = 0.71073 Å). The data were processed with the programs XAREA and X-RED32.<sup>S2</sup> The structures were solved by direct methods<sup>S3</sup> and refined by full-matrix least-squares techniques on the basis of all data against F<sup>2</sup> using SHELXL-2014/8.<sup>S4</sup> PLATON was used to search for higher symmetry.<sup>S5</sup> All non-hydrogen atoms were refined anisotropically. Graphics were produced with Ortep3 for Windows<sup>S6</sup> and Pov-RAY for Windows.<sup>S7</sup>

**Crystallographic data for [LCo<sup>II</sup>Co<sup>III</sup>(μ-F)(CuBr<sub>2</sub>)]ClO<sub>4</sub>·2MeCN (**3**·2MeCN).** The data set was of low quality and can only serve to confirm the atom connectivity. The mean I/σ(I) is only 2.78 and drops to below 3 at ~33° in 2 Θ. The structure could be solved and refined, but the model can only serve to confirm the atom connectivity. The cif file of this structure is available upon request from the corresponding author. **Crystal data:** C<sub>42</sub>H<sub>70</sub>Br<sub>2</sub>ClCo<sub>2</sub>CuFN<sub>8</sub>O<sub>4</sub>S<sub>2</sub>, M<sub>r</sub> = 1210.85 g/mol, monoclinic space group P2<sub>1</sub>/c, a = 12.973(3) Å, b = 31.574(6) Å, c = 13.549(3) Å, β = 114.88(3), V = 5035(2) Å<sup>3</sup>, Z = 4, ρ<sub>calcd</sub> = 1.597 g/cm<sup>3</sup>, T = 180(2) K, μ(Mo K<sub>α</sub>) = 2.85 mm<sup>-1</sup> (λ = 0.71073 Å), 17555 reflections measured, 8789 unique, 2892 with I > 2σ(I). Final R<sub>1</sub> = 0.0461, wR<sub>2</sub> = 0.0847 (I > 2σ(I)), 563 parameters / 0 restraints, min./max. residual electron density = -0.929/0.565 e/Å<sup>3</sup>.

A perspective view of the central core of **3** showing the immediate coordination environments of the Co and Cu atoms of the [LCo<sup>II</sup>Co<sup>III</sup>(μ-F)(Cu<sup>I</sup>Br<sub>2</sub>)]<sup>+</sup> cation in crystals of **3**·2MeCN is shown in Figure S21. On the basis of the larger metal ligand bond lengths, Co1 may be assigned divalent and Co2 is trivalent. Figure S22 provides a van der Waals representation of the cation with a viewing direction to the thiolate S atom S(1).



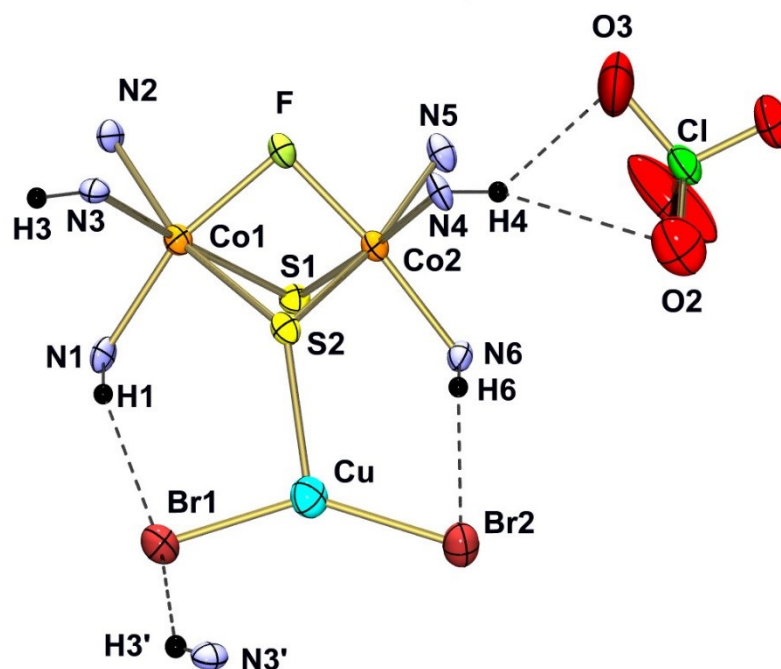

**Figure S21.** Perspective view of the immediate coordination environments of the Co and Cu atoms of the  $[\text{LCo}^{\text{II}}\text{Co}^{\text{III}}(\mu\text{-F})(\text{Cu}^{\text{I}}\text{Br}_2)]^+$  cation in crystals of **3**·2MeCN (C and H atoms, except NH atoms, omitted for clarity). Thermal ellipsoids are drawn at the 50 % probability level. Intra- and intermolecular hydrogen bonding interactions are indicated by dashed lines. Selected bond lengths / Å and angles / °: Given the low quality of the data, all parameters should be taken indicative rather than definitive. Co1–F1 2.075(5), Co1–N1 2.105(8), Co1–N2 2.230(10), Co1–N3 2.138(8), Co1–S2 2.537(3), Co1–S1 2.563(3), Co2–F1 1.993(6), Co2–N4 1.936(7), Co2–N5 2.157(9), Co2–N6 2.095(9), Co2–S1 2.212(3), Co2–S2 2.272(3), Cu–S2 2.465(3), Cu–Br1 2.294(2), Cu–Br2 2.342(2), Cu<sup>I</sup>...Ar<sup>centroid</sup> 3.21 (Ar<sup>centroid</sup> refers to the center of the aryl ring next to the Cu<sup>I</sup> atom (not shown)); Br1–Cu–Br2 144.35(8), Br1–Cu–S2 99.24(9), Br2–Cu–S2 115.82(8), H1...Br1 3.01, H6...Br2 2.67, H3...Br1 2.67, H4...O2 2.55, H4...O3 2.72; H1...Br1–Cu 92°, H6...Br2–Cu 74°, Br1...N3 3.555. Symmetry code used to generate equivalent atoms: +x, 0.5–y, 0.5+z (⊞)

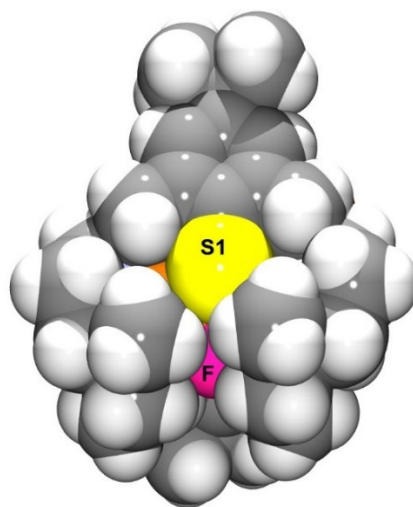

**Figure S22.** Van der Waals representation of the environment of the thiolate atom S1 in  $[\text{LCo}^{\text{II}}\text{Co}^{\text{III}}(\mu\text{-F})(\text{CuBr}_2)]\text{ClO}_4$  (**3**). In contrast to the environment of the atom S2 (see Figure 2

main text), there are no nearby NH donors that could form hydrogen bonds with a  $\text{CuBr}_2^-$  moiety (if the latter would bind to this S1 atom).

**Crystallographic data for  $[\text{Ni}^{\text{II}}_2\text{L}(\mu\text{-F})(\text{CuI}_2)] \cdot 2\text{MeCN}$  (**6** $\cdot 2\text{MeCN}$ ).**  $\text{C}_{42}\text{H}_{70}\text{CuFI}_2\text{N}_8\text{Ni}_2\text{S}_2$ ,  $M_r = 1204.94$  g/mol, triclinic space group  $P\bar{1}$ ,  $a = 13.171(3)$  Å,  $b = 13.363(3)$  Å,  $c = 15.858(3)$  Å,  $\alpha = 92.79(3)^\circ$ ,  $\beta = 108.39(3)^\circ$ ,  $\gamma = 110.92(3)^\circ$ ,  $V = 2432.6(12)$  Å<sup>3</sup>,  $Z = 2$ ,  $\rho_{\text{calcd}} = 1.645$  g/cm<sup>3</sup>,  $T = 180(2)$  K,  $\mu(\text{Mo K}\alpha) = 2.60$  mm<sup>-1</sup> ( $\lambda = 0.71073$  Å), 30126 reflections measured, 10418 unique, 9181 with  $I > 2\sigma(I)$ . Final  $R_1 = 0.0326$ ,  $wR_2 = 0.0873$  ( $I > 2\sigma(I)$ ), 523 parameters / 0 restraints, min./max. residual electron density =  $-1.251/1.323$  e/Å<sup>3</sup>. CCDC-number: 2034011. A perspective view of the central core of **6** showing the immediate coordination environments of the Ni and Cu atoms of the neutral  $[\text{LNi}^{\text{II}}_2(\mu\text{-F})(\text{CuI}_2)]$  complex in crystals of **6** $\cdot 2\text{MeCN}$  is shown in Figure S23. The  $\text{H1}\cdots\text{I1}$  distance at 2.88 Å is much shorter than the sum (3.18 Å) of the van der Waals radii of  $r_w(\text{H}) = 1.20$ ,  $r_w(\text{I}) = 1.98$  Å.<sup>S8</sup> The  $\text{I2}\cdots\text{H6}$  and  $\text{I1}\cdots\text{H3}'$  distances at 3.71 Å and 3.34 Å, on the other hand, are much longer than the  $\text{I1}\cdots\text{H1}$  distance, and the corresponding atoms are thus not connected by a hydrogen bond (taking the sum of the van der Waals radii as the criterion).

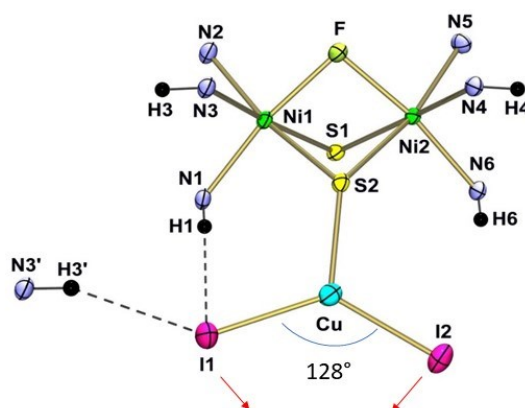

**Figure S23.** Perspective view of the immediate coordination environments of the Ni and Cu atoms of the neutral  $[\text{Ni}^{\text{II}}_2(\text{L})(\mu\text{-F})(\text{CuI}_2)]$  complex in crystals of **6** $\cdot 2\text{MeCN}$  (C and H atoms, except NH atoms, omitted for clarity). Thermal ellipsoids are drawn at the 50 % probability level. Hydrogen bonding interactions are indicated by dashed lines. Selected bond lengths / Å and angles /°: Cu-I1 2.547(1), Cu-I2 2.512(1), Cu-S2 2.2968(9), Ni1-F1 2.066(2), Ni1-N1 2.132(2), Ni1-N2 2.189(3), Ni1-N3 2.116(2), Ni1-S1 2.421(1), Ni1-S2 2.448(1), Ni2-F1 2.052(2), Ni2-N4 2.116(2), Ni2-N5 2.181(3), Ni2-N6 2.142(2), Ni2-S1 2.473(1), Ni2-S2 2.482(1); I1-Cu-S2 114.44(3), I2-Cu-S2 116.57(3), I1-Cu-I2 128.03(4); I1 $\cdots$ H1 2.88, I1 $\cdots$ H3' 3.34. The red arrows illustrate the strong bending of the  $[\text{CuI}_2]^-$  unit. This leads to a large I2 $\cdots$ H6 distance of 3.71 Å, which is out of the range of a hydrogen bonding interaction. Symmetry code used to generate equivalent atoms:  $-x, -y, -z$  (⊞).

## 5) Characterization of compounds 3 and 4-6 by variable temperature dc magnetic susceptibility measurements

### a) Magnetic susceptibility measurements for $[\text{LCo}^{\text{II}}\text{Co}^{\text{III}}(\mu\text{-F})(\text{CuBr}_2)]\text{ClO}_4$ (**3**)

The temperature dependence of the magnetic susceptibility of compound  $[\text{LCo}^{\text{II}}\text{Co}^{\text{III}}(\mu\text{-F})(\text{CuBr}_2)]\text{ClO}_4$  (**3**) was investigated in the temperature range between 2 and 330 K in an applied external field of  $B = \mu_0 H = 1.0$  T using an MPMS 7XL SQUID magnetometer (Quantum

Design). The observed susceptibility data were corrected for underlying diamagnetism. Figure S24 shows the experimental data and the theoretical fit in the form of a  $\mu_{\text{eff}}$  versus T plot.

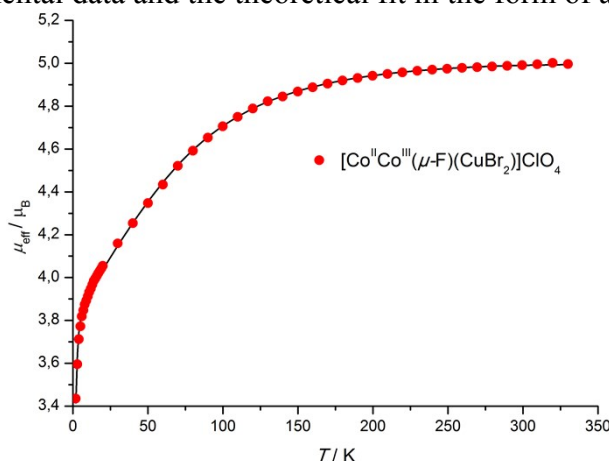

**Figure S24.** Temperature dependence of the effective magnetic moment  $\mu_{\text{eff}}$  (per dinuclear complex) for **3**. The solid line corresponds to the best fit to eq. 1.

The effective magnetic moment of the mixed-valent  $\text{Co}^{\text{II}}\text{Co}^{\text{III}}$  complex at 295 K ( $4.99 \mu_{\text{B}}$ ) is in good agreement with the presence of a high-spin  $\text{Co}^{2+}$  ion ( $d^7$ ,  $S = 3/2$ ), a low-spin  $\text{Co}^{3+}$  ion ( $d^6$ ,  $S=0$ ), and a  $\text{Cu}^+$  ion ( $d^{10}$ ,  $S = 0$ ). The  $\mu_{\text{eff}}$  value is significantly larger than the theoretical spin-only value of  $3.87 \mu_{\text{B}}$  for a six-coordinate  $\text{Co}^{2+}$  ion ( $S = 3/2$ ,  $g = 2.00$ ), attributed to an orbital contribution to the magnetic moment, which is typically observed for high-spin  $\text{Co}^{\text{II}}$  complexes with a  ${}^4T_{1g}$  ground state (in  $O_h$  symmetry).<sup>S9</sup> The magnetic moment of **3** decreases with decreasing temperature to a value of  $3.44 \mu_{\text{B}}$  at 2 K, as a consequence of zero-field splitting and the residual orbital angular momentum of the  $\text{Co}^{2+}$  ion. The temperature dependence of the magnetic susceptibility for the cobalt complex was analysed by using the spin-Hamiltonian (equation S1) by using a full-matrix diagonalization approach.

$$\hat{H} = [D_i (\mathcal{S}_{zi}^2 - \frac{1}{3} \mathcal{S}_i (\mathcal{S}_i + 1)) + g_i \mu_B \mathcal{S}_{i\tau} B_\tau] \quad (\tau = x, y, z) \quad (\text{S1})$$

A reasonable fit to the experimental susceptibility data was possible. The best fit gave the following parameters:  $g = 2.55$ ,  $|D| = 88.94 \text{ cm}^{-1}$ .

### b) Variable-temperature magnetic susceptibility measurements for the complexes $[\text{LNi}^{\text{II}}_2(\mu\text{-F})(\text{Cu}^{\text{I}}\text{X}_2)]$ (X = Cl (**4**), Br (**5**), I (**6**))

Variable-temperature magnetic susceptibility measurements were performed for powdered samples of the complexes **4-6** between 2 and 330 K in an applied external magnetic field of  $B = 1.0 \text{ T}$  by using a SQUID magnetometer. Plots of the temperature dependence of the effective magnetic moment  $\mu_{\text{eff}}$  (per binuclear complex) are displayed in Figure 4 (main manuscript). The data for the precursor **2** have been reported earlier and are included for comparison.<sup>10</sup> The data for complex **6** are representative for the CT adducts **4-6** and will be described. As can be seen, the effective magnetic moment increases gradually from ca.  $4.4 \mu_{\text{B}}$  at 295 K to  $4.9 \mu_{\text{B}}$  at 15 K, and then decreases rapidly to  $4 \mu_{\text{B}}$  at 2 K. This behavior indicates an intramolecular ferromagnetic exchange interaction between the two  $\text{Ni}^{2+}$  ( $S = 1$ ) ions that leads to an  $S_t = 2$  high-spin ground state. Notice that the precursor complex **2** shows a different behavior. The effective magnetic moment decreases steadily from  $4.44 \mu_{\text{B}}$  at 300 K to  $4.12 \mu_{\text{B}}$  at 17 K and then drops rapidly to  $2.3 \mu_{\text{B}}$  at 2 K, indicative of an antiferromagnetic exchange interaction that leads to a diamagnetic  $S_t = 0$  ground state. The change of the coupling type from

antiferromagnetic in **2** to ferromagnetic in **6** is ascribed to the RS→Cu<sup>+</sup> CT interaction in **6** that reduces the e<sup>-</sup> density on the thiolate sulfur atom S2, thereby altering the magnetic coupling through the thiolato bridges.

The temperature dependence of the magnetic susceptibility for the dinuclear nickel complexes was analyzed by using the spin Hamiltonian (eq S2) utilizing a full matrix diagonalization approach.<sup>S11</sup> The magnetic interaction is represented by an isotropic Heisenberg-Dirac-van Vleck exchange interaction term where  $J$  is the magnetic exchange coupling constant,<sup>S12</sup> and  $D_i$  and  $g_i$  are the local axial zero field splitting parameters and  $g$  values (isotropic average), respectively.<sup>S13</sup> The  $D$  and  $g$  values were considered to be identical for the two nickel ions.

$$\hat{H} = -2J\hat{S}_1\hat{S}_2 + \sum_{i=1}^2 [D_i(\hat{S}_{zi}^2 - \frac{1}{3}\hat{S}_i(\hat{S}_i + 1)) + g_i\mu_B\hat{S}_{i\tau}B_\tau] \quad (\tau = x, y, z) \quad (S2)$$

A reasonable fit of the experimental data was possible by taking into account the zero-field splitting and temperature independent paramagnetism (TIP), yielding  $J = +15.7 \text{ cm}^{-1}$ ,  $|D| = 6.0 \text{ cm}^{-1}$ ,  $g = 2.0$  for **4**,  $J = +7.9 \text{ cm}^{-1}$ ,  $|D| = 5.7 \text{ cm}^{-1}$ ,  $g = 2.06$  for **5**, and  $J = +10.3 \text{ cm}^{-1}$ ,  $|D| = 3.7 \text{ cm}^{-1}$ , and  $g = 2.18$  for **6**. Thus, in all cases a weak ferromagnetic exchange interaction is present in **4-6** that leads to a paramagnetic  $S_i = 2$  ground state. It should be noted that temperature dependent magnetic susceptibility measurements are not very appropriate for the determination of the sign and magnitude of  $D$ ,<sup>S14</sup> and the  $D$  value should therefore be taken indicative rather than definitive.<sup>S15</sup> On the other hand, the value of  $J$  is not influenced markedly by the value (or sign) of  $D$  and represents an accurate measure of the magnetic coupling in this complex.

The conversion of the S=0 spin ground state in **2** to a S=2 spin ground state in **4-6** can be traced to the attachment of the cuprate ions to one of the bridging thiophenolato groups. If it can be assumed that the coupling in these compounds is the arithmetic sum of the individual coupling constants through the RS1→CuX<sub>2</sub>, RS2, and F bridges and that the coupling through the F and the RS groups in **4-6** is identical to that in **2** (as determined by broken-symmetry DFT calculations,<sup>S10</sup> i.e.  $J(\mu\text{-F}^-) = 54.20 \text{ cm}^{-1}$ ,  $J(\mu\text{-SR}) = -27.38 \text{ cm}^{-1}$ ), then the coupling through the triply bridging  $\mu\text{-SR}\rightarrow\text{CuX}_2$  bridges is less antiferromagnetic in nature ( $-11.12 \text{ cm}^{-1}$  (**4**),  $-19.12 \text{ cm}^{-1}$  (**5**), and  $-16.52 \text{ cm}^{-1}$  (**7**)) than through a  $\mu_2$ -bridging thiophenolato group. A similar behavior was observed for a related thiolate→Br<sub>2</sub> CT complex.<sup>S16</sup>

$$J_{\text{tot}}(\mathbf{2}) = J(\mu\text{-F}^-) + 2 \times J(\mu\text{-SR}^-) = -0.56 \text{ cm}^{-1} \quad (S3)$$

$$J_{\text{tot}}(\mathbf{4-6}) = J(\mu\text{-F}^-) + J(\mu\text{-SR}^-) + J(\mu\text{-SR}\rightarrow\text{CuX}_2) \quad (S4)$$

**Table S2.** Magnetic properties and selected metrical data for complexes **2**, **4-6**.

|          | $g$  | $ D /$<br>$\text{cm}^{-1}$ | $J_t/$<br>$\text{cm}^{-1}$ | $\chi_{\text{TIP}}/$<br>$\text{cm}^3 \cdot \text{mol}^{-1}$ | $\mu_{\text{eff},330\text{K}}/$<br>$\mu_B$ | Ni-S-Ni<br>angles / °    | Ni-F-Ni<br>angle / ° | Ni-S / Å                                     |
|----------|------|----------------------------|----------------------------|-------------------------------------------------------------|--------------------------------------------|--------------------------|----------------------|----------------------------------------------|
| <b>2</b> | 2.18 | 8.65                       | -0.56                      | $502.3 \cdot 10^{-6}$                                       | 4.40                                       | 76.30                    | 95.6(1)              | 2.482(1)<br>2.487(1)<br>2.436(1)<br>2.479(1) |
| <b>4</b> | 2.00 | 6.0                        | +15.7                      | $1565 \cdot 10^{-6}$                                        | 4.35                                       | <i>n.d.</i>              | -                    | -                                            |
| <b>5</b> | 2.06 | 5.7                        | +7.9                       | $242.7 \cdot 10^{-6}$                                       | 4.16                                       | <i>n.d.</i>              | -                    | -                                            |
| <b>6</b> | 2.18 | 3.7                        | +10.3                      | $1298 \cdot 10^{-6}$                                        | 4.48                                       | 77.72 (S1)<br>77.03 (S2) | 96.41                | 2.421(1)<br>2.448(1)<br>2.473(1)<br>2.482(1) |

## 6) Characterization of complexes by UV-vis-Spectroscopy

### a) UV-vis Spectroscopy for $[\text{LCo}_2(\mu\text{-F})(\text{CuBr}_2)]\text{ClO}_4$ (**3**)

The electronic absorption spectrum of complex **3** has been recorded in acetonitrile solution at ambient temperature. Figure S25a displays the 190-450 nm region of the spectrum. The 450-1000 nm range of the spectrum is shown in Figure S25b. The UV-vis spectrum of the mixed-valent  $\text{Co}^{\text{III}}\text{Co}^{\text{II}}$  complex is dominated by intense  $\pi\text{-}\pi^*$  (190-300 nm) and thiophenolate-to-cobalt(III) charge transfer transitions (300-500 nm) characteristic of thiolato-bridged cobalt(III)-complexes.<sup>S17</sup> The spectrum displays also several weak features in the visible region, attributable to spin-allowed but Laporte-forbidden  $d\text{-}d$  transitions of a  $\text{Co}^{2+}$  ion. The features at 557 (sh), 620 (sh), 650 (sh), and 680 (sh) nm are attributable to components of the parent octahedral ligand field transitions ( ${}^4T_{1g}(\text{F}) \rightarrow {}^4T_{1g}(\text{P})$ ,  ${}^4T_{1g}(\text{F}) \rightarrow {}^4A_{2g}$ ) split by lower symmetry.

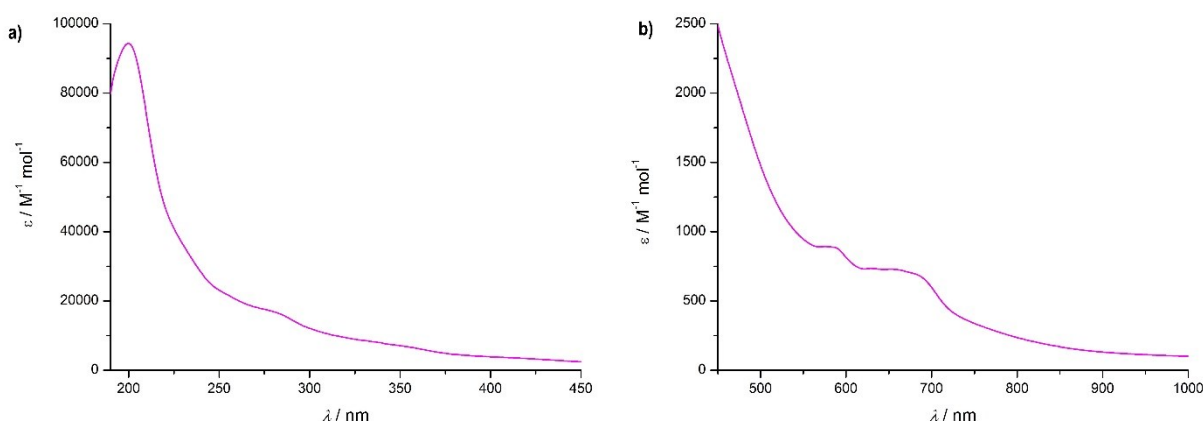

**Figure S25.** UV-vis-NIR spectra of  $[\text{LCo}^{\text{II}}\text{Co}^{\text{III}}(\mu\text{-F})(\text{CuBr}_2)]\text{ClO}_4$  (**3**) in  $\text{CH}_3\text{CN}$  at 298 K. Concentration of solutions:  $1 \times 10^{-3}$  M (vis-NIR range, left figure) and  $1 \times 10^{-5}$  M (UV range, left figure).

### b) UV/vis Spectroscopy for the complexes $[\text{LNi}_2(\mu\text{-F})(\text{CuX}_2)]$ ( $\text{X} = \text{Cl}$ (**4**), $\text{Br}$ (**5**), $\text{I}$ (**6**))

Figure S26 shows the electronic absorption spectra of  $10^{-3}$  M and  $10^{-5}$  M solution of compounds **4-6** in the vis-NIR (400-1350 nm) and UV region (190-400 nm), respectively. The electronic absorption spectra of the free ligand and of compound **2** are shown for comparative purposes. Table S1 lists the data and assignments. The two bands around 600 and 1050 nm are attributable to  $d\text{-}d$  transitions and are typical for  $\text{Ni}^{\text{II}}$  complexes with a distorted octahedral  $\text{Ni}^{\text{II}}\text{N}_3\text{S}_2\text{X}$  coordination environment.<sup>S1</sup> The  $\nu_2$  ( ${}^3A_{2g} \rightarrow {}^3T_{1g}$  in  $\text{O}_h$  symmetry) transition occurs in the 580-630 nm range and the  $\nu_1$  transition ( ${}^3A_{2g} \rightarrow {}^3T_{2g}$ ) is seen between 950 and 1200 nm. Complexes **4-6** exhibit a weak shoulder at  $\sim 450$  nm which may be due to the  $\nu_3$  ( ${}^3A_{1g} \rightarrow {}^3T_{1g}(\text{P})$ ) transition of the octahedral  $\text{Ni}^{\text{II}}\text{N}_3\text{S}(\text{S-CuX})\text{F}$  chromophore. The UV region is dominated by more intense  $\pi\text{-}\pi^*$  transitions within the aromatic rings of the supporting ligand. The features at 325 nm are tentatively assigned to thiolate to  $\text{Ni}^{2+}$  or thiolate to  $\text{Cu}^+$  charge transfer transition.

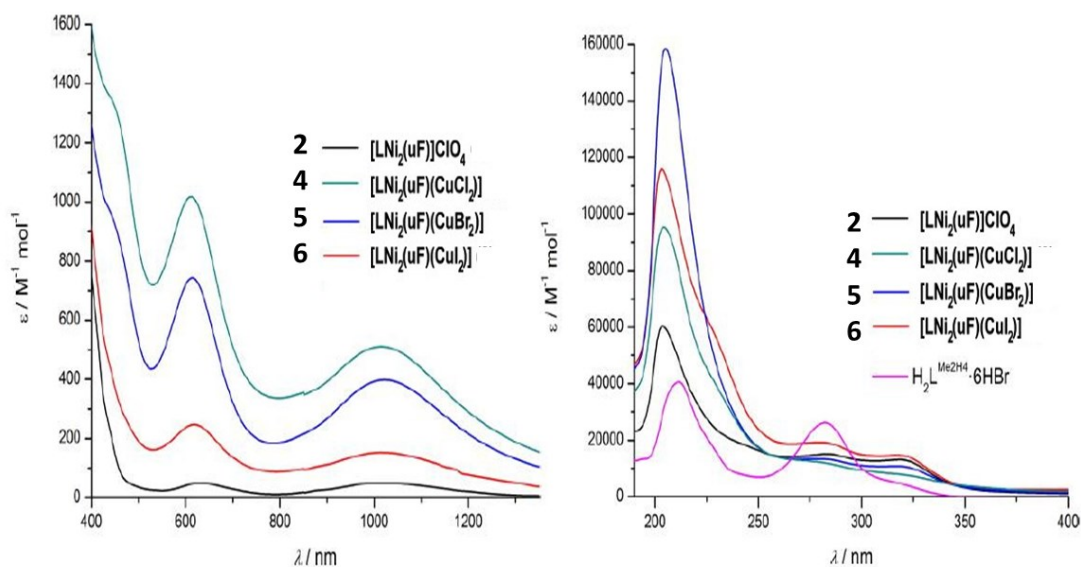

**Figure S26.** UV-vis-NIR spectra of the complexes  $[\text{LNi}^{\text{II}}_2(\mu\text{-F})(\text{CuX}_2)]$  ( $\text{X} = \text{Cl}$  (**4**),  $\text{Br}$  (**5**),  $\text{I}$  (**6**)) in  $\text{CH}_3\text{CN}$  at 298 K. Concentration of solutions:  $1 \times 10^{-3}$  M (vis-NIR range, left figure) and  $1 \times 10^{-5}$  M (UV range, right figure).

### 7) EPR spectrum for **3**

The continuous wave (cw) EPR measurements for **3** were performed at X-band frequency (9.4 GHz) with a Bruker EMX micro spectrometer equipped with a high sensitivity ER 4119 HS cylindrical cavity and an Oxford Instruments He cryostat ESR 900. The EPR spectrum of **3** (Figure S27) reveals a strong signal centered at  $g_{\text{av}} \sim 4.0$  typical for high-spin  $\text{Co}^{\text{II}}$  ions with an  $S = 3/2$  spin ground state.<sup>S17</sup>

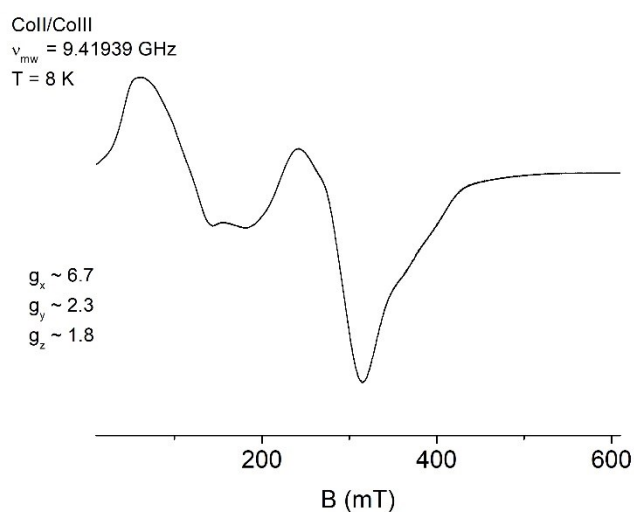

**Figure S27.** EPR powder spectrum of  $[\text{LCo}^{\text{II}}\text{Co}^{\text{III}}(\mu\text{-F})(\text{CuBr}_2)]\text{ClO}_4$  (**3**) at 8 K. Conditions: microwave frequency,  $\nu = 9.41939$  GHz, microwave power, 2 mW; modulation frequency, 100 kHz, modulation amplitude: 4 G.

## 8) Characterization of Compounds by DFT calculations

Density functional theoretical calculations (DFT) calculations on the cobalt and nickel complexes  $[\text{LCo}_2(\mu\text{-F})]^{2+}$ , **3**, **5** and **6**, respectively, were carried out using the Jaguar program package (version 10.3).<sup>S18</sup> The geometry optimizations were performed using the M06-D3 density functional. The M06-D3 functional is parameterized for organometallic and non-covalent interactions<sup>S19</sup> and includes physically and chemically important London dispersion interactions.<sup>S20</sup> The same computational model was successfully utilized for calculation of the bonding situation of other nickel thiolate→iodine charge-transfer complexes.<sup>S21</sup> The molecular geometries and energies of the studied structures were calculated at the M06-D3/LACVP\*/PBF level of theory as implemented in the Jaguar program package. The LACVP\* basis set uses the standard 6-31G(d) basis set for light elements and the LAC pseudopotential for heavier elements,<sup>S22</sup> such as Co, Ni, Br and I in this case.

All geometry optimizations were carried out starting from the crystallographically determined atom coordinates of either **2**, **3** or **6**. The geometry of the complex  $[\text{LCo}^{\text{II}}\text{Co}^{\text{III}}(\text{F})]^{2+}$  (which has not yet been synthesized) was optimized starting from the coordinates of the  $[\text{LCo}^{\text{II}}\text{Co}^{\text{III}}(\text{F})\text{CuBr}_2]^{2+}$  cation in **3** (with the  $\text{CuBr}_2$ -moiety omitted). The geometry of the complex  $[\text{LNi}^{\text{II}}_2(\text{F})(\text{CuBr}_2)]$  **5** (synthesized but not yet crystallographically characterized) was optimized starting from the coordinates of the  $[\text{LNi}^{\text{II}}_2(\text{F})(\text{CuI}_2)]$  complex in **6** (with the two I substituents replaced by Br atoms). Frequency calculations were done at the same level of theory to characterize the stationary points on the potential surface and to obtain total enthalpy ( $H_{\text{tot}}$ ) and Gibbs free energy ( $G$ ) at a standard temperature of 298.15 K. The calculated frequencies were scaled by a factor of 0.94.

To take solvent effects (acetonitrile and THF in our case) into account the calculation were done using Jaguar's dielectric continuum Poisson-Boltzmann solver, which fits the field produced by the solvent dielectric continuum to another set of point charges.<sup>S23</sup> Counterions and/or solvent molecules were neglected. The quartet state ( $M^S = 4$ ) for **3** was found to be 10.6 kcal mol<sup>-1</sup> more stable than the doublet ( $M^S = 2$ ) state, while the quintet state for **6** ( $M^S = 5$ ) is 36.5 kcal mol<sup>-1</sup> and 48.5 kcal mol<sup>-1</sup> more stable than the triplet ( $M^S = 3$ ) and singlet ( $M^S = 1$ ) states, respectively. Consequently, the analysis of quantum chemical data was further done for the quartet states of **3** and the quintet states of **5** and **6**, respectively.

### a) DFT calculations for $[\text{LCo}^{\text{II}}\text{Co}^{\text{III}}(\mu\text{-F})]^{2+}$

Figure S28 displays the optimized geometry of the  $[\text{LCo}^{\text{II}}\text{Co}^{\text{III}}(\mu\text{-F})]^{2+}$  dication in the gas phase. The optimized geometry of the fluoro-bridged complex (in MeCN) was found to be very similar to the structure of the hydroxido-bridged  $[\text{LCo}^{\text{II}}\text{Co}^{\text{III}}(\mu\text{-OH})]^{2+}$  dication in **1**, which is taken as the reference compound. The average  $\text{Co}^{\text{III}}\text{-S}$  bond distances are ca. 0.02 Å longer and the average  $\text{Co}^{\text{II}}\text{-S}$  bonds are 0.003 Å longer in the calculated structure (Table S3). The average  $\text{Co}^{\text{III}}\text{-N}$  bond distances and the average  $\text{Co}^{\text{II}}\text{-N}$  bond distances (not listed in Table S3) in the calculated structure and the experimental structure are virtually identical. The main difference between the calculated structure of the  $[\text{LCo}^{\text{II}}\text{Co}^{\text{III}}(\mu\text{-F})]^{2+}$  dication and the experimental structure of the  $[\text{LCo}^{\text{II}}\text{Co}^{\text{III}}(\mu\text{-OH})]^{2+}$  dication in **1** is an increase in the  $\text{Co}^{\text{II}}\text{-F}$  distance of ca. 0.08 Å in the calculated relative to the  $\text{Co}^{\text{II}}\text{-OH}$  distance of the experimental structure of **1** [ $\text{Co}^{\text{II}}\text{-F} = 2.136$  Å and  $\text{Co}^{\text{II}}\text{-OH} = 2.083(4)$  Å]. This is not surprising in view of the different bridging groups.

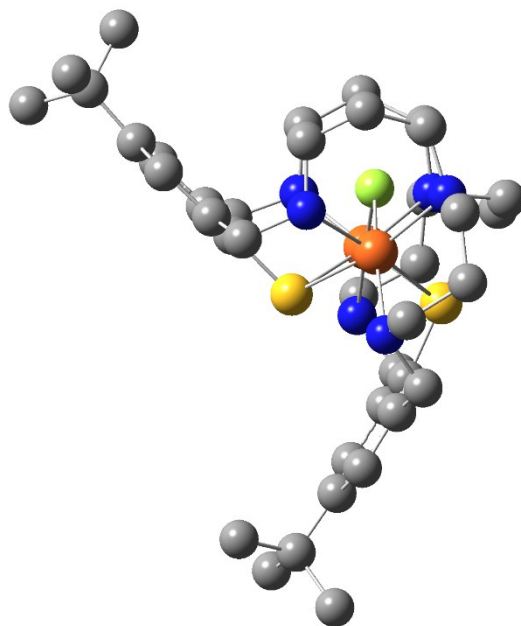

**Figure S28.** DFT optimized geometry of the  $[\text{LCo}^{\text{II}}\text{Co}^{\text{III}}(\mu\text{-F})]^{2+}$  (M06-D3/LACVP\*/PBF) in the gas phase (the structures in THF and MeCN are very similar and not shown). The cartesian coordinates of the calculated structures are provided in Tables S5a-c.

### b) DFT calculations for $[\text{LCo}^{\text{II}}\text{Co}^{\text{III}}(\mu\text{-F})(\text{CuBr}_2)]^+$ (**3**)

Figure S29 displays the optimized geometry for the  $[\text{LCo}^{\text{II}}\text{Co}^{\text{III}}(\mu\text{-F})(\mu\text{-CuBr}_2)]^+$  cation in **3** for the gas phase, and in THF and MeCN solution. The structure of the  $[\text{LCo}^{\text{II}}\text{Co}^{\text{III}}(\mu\text{-F})]^{2+}$  fragment in **3** is very similar to the structure of the  $[\text{LCo}^{\text{II}}\text{Co}^{\text{III}}(\mu\text{-OH})]^+$  cation in **1**. Table S3 lists the computed parameters. The DFT calculations show that 0.11 negative charges ( $0.11 e^-$ ) are transferred from the  $\text{RS}^-$  donor to the  $[\text{CuBr}_2]^-$  acceptor.

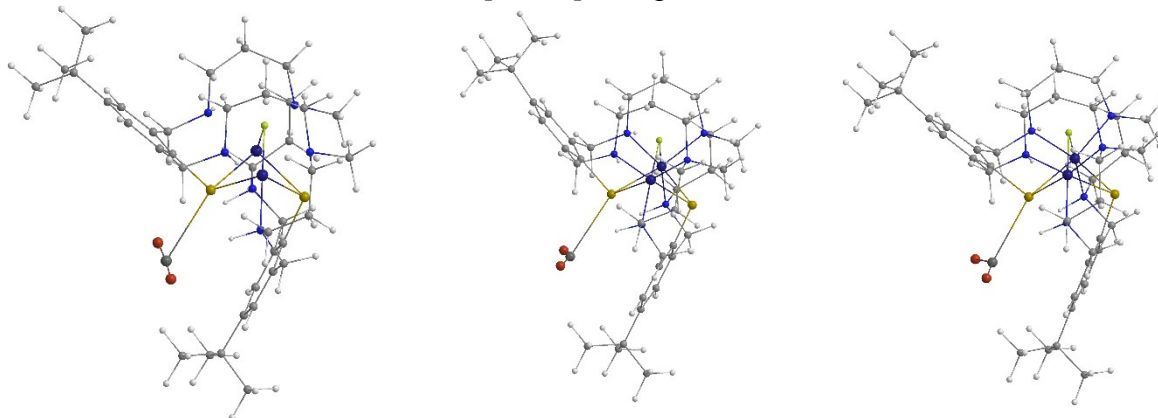



**Figure S29.** DFT optimized geometry of  $[\text{LCo}^{\text{II}}\text{Co}^{\text{III}}(\mu\text{-F})(\text{Cu}^{\text{I}}\text{Br}_2)]^+$  (**3**,  $M^S = 4$ , quartet state, M06-D3/LACVP\*/PBF) in the gas phase (left), THF (middle) and MeCN (right). The cartesian coordinates of the calculated structures are provided in Tables S6a-S6c.

**Table S3.** Experimental and calculated bond lengths and charge shift  $\delta Q / e^-$  for the dication  $[\text{LCo}^{\text{II}}\text{Co}^{\text{III}}(\mu\text{-F})]^{2+}$  and the cation  $[\text{LCo}^{\text{II}}\text{Co}^{\text{III}}(\mu\text{-F})(\text{CuBr}_2)]^+$  in **3** resulting from DFT calculations at the M06-D3/LACVP\* level of theory.

| Complex                                                                                                                                           | DFT / Solvation         |                   |                    |                                                 |
|---------------------------------------------------------------------------------------------------------------------------------------------------|-------------------------|-------------------|--------------------|-------------------------------------------------|
| $[\text{LCo}^{\text{II}}\text{Co}^{\text{III}}(\mu\text{-F})]^{2+}$ ( $M^S = 4$ )<br>Co1 = $\text{Co}^{2+}$ , Co2 = $\text{Co}^{3+}$ .            | gas phase <sup>a)</sup> | THF <sup>a)</sup> | MeCN <sup>a)</sup> | crystallographic data for <b>1</b> <sup>b</sup> |
| Co1-S1                                                                                                                                            | 2.512                   | 2.493             | 2.504              | 2.526                                           |
| Co1-S2                                                                                                                                            | 2.580                   | 2.564             | 2.577              | 2.529                                           |
| Co2-S1                                                                                                                                            | 2.334                   | 2.302             | 2.311              | 2.310                                           |
| Co2-S2                                                                                                                                            | 2.312                   | 2.317             | 2.321              | 2.304                                           |
| Co1-F1                                                                                                                                            | 2.069                   | 2.137             | 2.136              | 2.058 (Co <sup>II</sup> -O1)                    |
| Co2-F1                                                                                                                                            | 1.909                   | 1.927             | 1.921              | 1.939 (Co <sup>III</sup> -O1)                   |
| Co1-S1-Co2                                                                                                                                        | 75.8                    | 79.5              | 80.0               | 78.1                                            |
| Co1-S2-Co2                                                                                                                                        | 76.7                    | 77.7              | 78.3               | 78.0                                            |
| Co1-F1-Co2                                                                                                                                        | 98.3                    | 97.9              | 99.4               | 99.4 (Co-OH-Co)                                 |
|                                                                                                                                                   |                         |                   |                    |                                                 |
| Complex                                                                                                                                           | DFT / Solvation         |                   |                    |                                                 |
| $[\text{LCo}^{\text{II}}\text{Co}^{\text{III}}(\mu\text{-F})(\text{CuBr}_2)]^+$ ( <b>3</b> )<br>Co1 = $\text{Co}^{2+}$ , Co2 = $\text{Co}^{3+}$ . | gas phase               | THF               | MeCN               |                                                 |
| Co1-S1                                                                                                                                            | 2.513                   | 2.526             | 2.537              |                                                 |
| Co1-S2                                                                                                                                            | 2.515                   | 2.562             | 2.590              |                                                 |
| Co2-S1                                                                                                                                            | 2.327                   | 2.329             | 2.330              |                                                 |
| Co2-S2                                                                                                                                            | 2.261                   | 2.298             | 2.310              |                                                 |
| Co1-F                                                                                                                                             | 2.084                   | 2.102             | 2.101              |                                                 |
| Co2-F                                                                                                                                             | 1.926                   | 1.924             | 1.925              |                                                 |
| Co1-S1-Co2                                                                                                                                        | 76.2                    | 78.1              | 78.4               |                                                 |
| Co1-S2-Co2                                                                                                                                        | 77.3                    | 77.9              | 77.7               |                                                 |
| Co1-F-Co2                                                                                                                                         | 96.3                    | 98.9              | 99.8               |                                                 |
| Cu-S2                                                                                                                                             | 2.788                   | 2.790             | 2.736              |                                                 |
| Cu-Br1                                                                                                                                            | 2.401                   | 2.392             | 2.393              |                                                 |
| Cu-Br2                                                                                                                                            | 2.375                   | 2.392             | 2.403              |                                                 |
| Br1-Cu-Br2                                                                                                                                        | 176.9°                  | 163.0°            | 156.8°             |                                                 |
| Q(CuBr <sub>2</sub> )                                                                                                                             | -0.815                  | -1.023            | -1.078             |                                                 |
| $\delta Q(\text{CuBr}_2)$                                                                                                                         | +0.185                  | -0.023            | -0.078             |                                                 |

a) The geometry of the  $[\text{LCo}^{\text{II}}\text{Co}^{\text{III}}(\mu\text{-F})]^{2+}$  dication was optimized starting from the coordinates of the  $[\text{LCo}^{\text{II}}\text{Co}^{\text{III}}(\mu\text{-F})(\text{CuBr}_2)]^+$  cation in **3** (with the  $[\text{CuBr}_2]$ -moiety omitted). The cartesian coordinates of the calculated structures are provided in Tables S5a-c (for the  $[\text{LCo}^{\text{II}}\text{Co}^{\text{III}}(\mu\text{-F})]^{2+}$  dication) and S6a-c (for **3**). b) Given the absence of an X-ray crystal structure, we provide here the bond lengths of the hydroxido-bridged  $[\text{LCo}^{\text{II}}\text{Co}^{\text{III}}(\mu\text{-OH})]^{2+}$  dication in **1**. The comparison should be taken indicative rather than definitive.

Figure S30 lists the calculated N-H stretching frequencies for complex **3** at the M06-D3/LACVP\*/PBF level of theory (solvation model: THF). The data are discussed in the main text.

calculated  $\nu(\text{NH})$  stretching frequencies /  $\text{cm}^{-1}$

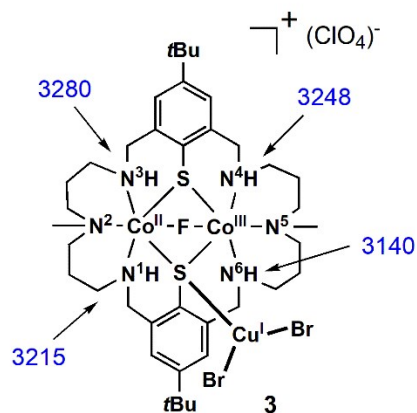

**Figure S30.** Drawing of complex **3** showing the scaled calculated N-H stretching frequencies ( $\text{cm}^{-1}$ ) at the M06-D3/LACVP\*/PBF level of theory (solvation model: THF). The indexes refer to atom numbers utilized in the crystallographic analysis. Note that N2 and N5 are methylated and show no NH frequencies.

### c) DFT calculations for the $[\text{LNi}^{\text{II}}_2(\mu\text{-F})]^+$ cation in $[\text{LNi}^{\text{II}}_2(\mu\text{-F})]\text{ClO}_4$ (**2**)

Figure S31 displays the optimized geometry of the  $[\text{LNi}^{\text{II}}_2(\mu\text{-F})]^+$  cation in the gas phase. The optimized geometry of the fluoro-bridged complex (in MeCN) was found to be in excellent agreement to the experimental structure. The average Ni<sup>II</sup>-S bond distances are identical in the calculated and experimental structure. The average Ni<sup>II</sup>-F distances are ca. 0.02 Å longer and the average Ni<sup>II</sup>-N bonds are 0.01 Å longer (not listed in Table 4) in the calculated structure (Table S3).

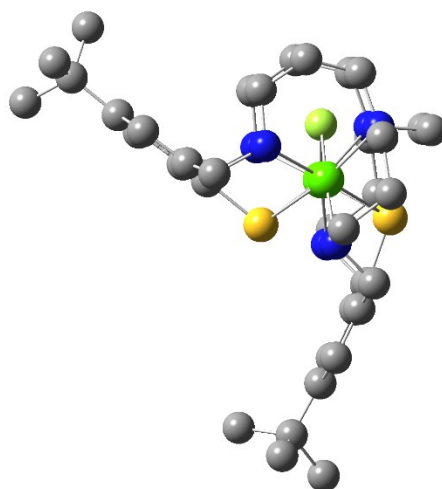

**Figure S31.** DFT optimized geometry of the  $[\text{LNi}^{\text{II}}_2(\mu\text{-F})]^+$  cation in **2** (M06-D3/LACVP\*/PBF) in the gas phase (the structures in THF and MeCN are very similar and not shown). The cartesian coordinates of the calculated structures are provided in Tables S7a-c.

#### d) Characterization of [LNi<sup>II</sup><sub>2</sub>(μ-F)(CuBr<sub>2</sub>)] (**5**) by DFT calculations

The geometry of the [LNi<sup>II</sup><sub>2</sub>(CuBr<sub>2</sub>)] complex was optimized starting from the X-ray coordinates of the [LNi<sup>II</sup><sub>2</sub>(μ-F)(CuI<sub>2</sub>)] complex in **6** (with the iodides replaced by bromides). Figure S32 displays the optimized geometry of the neutral complex [LNi<sup>II</sup><sub>2</sub>(μ-F)(CuBr<sub>2</sub>)] (the gas phase). Table S4 lists the computed bond lengths and angles. The Ni<sup>II</sup>-N, Ni<sup>II</sup>-S, and Ni<sup>II</sup>-F distances are in excellent agreement with those in **6**. The DFT calculations show that 0.24 negative charges are transferred from the RS<sup>-</sup> donor to the [CuBr<sub>2</sub>]<sup>-</sup> acceptor.

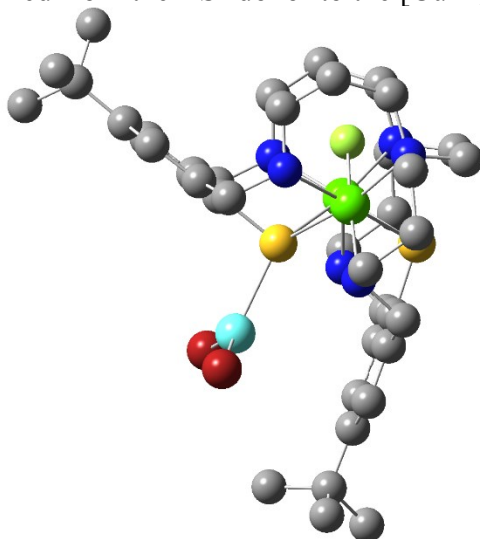

**Figure S32.** DFT optimized geometry of the [LNi<sup>II</sup><sub>2</sub>(μ-F)(CuBr<sub>2</sub>)] complex **5** (M06-D3/LACVP\*/PBF) in the gas phase (the structures in THF and MeCN are very similar and not shown). The cartesian coordinates of the calculated structures are provided in Tables S8a-c.

Figure S33 lists the calculated N-H stretching frequencies for complex **5** at the M06-D3/LACVP\*/PBF level of theory (solvation model: THF). The data are discussed in the main text.

calculated ν(NH) stretching frequencies / cm<sup>-1</sup>

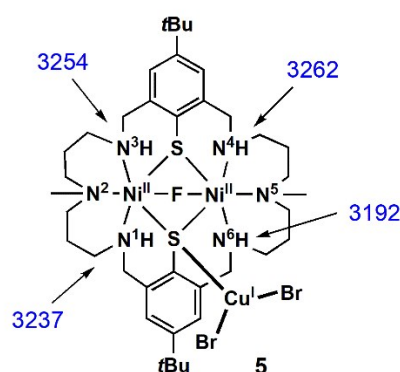

**Figure S33.** Drawing of complex **5** showing the scaled calculated N-H stretching frequencies (cm<sup>-1</sup>) at the M06-D3/LACVP\*/PBF level of theory (solvation model: THF). The indexes refer to atom numbers utilized in the crystallographic analysis. Note that N2 and N5 are methylated and show no NH frequencies.

### e) Characterization of $[\text{LNi}^{\text{II}}_2(\mu\text{-F})(\text{CuI}_2)]$ (**6**) by DFT calculations

Figure S34 displays the optimized geometry of the neutral complex  $[\text{LNi}^{\text{II}}_2(\mu\text{-F})(\text{CuI}_2)]$  (**6**) in gas phase, THF and MeCN. The optimized geometry of complex **6** in various solvents was found to be similar with the experimental crystal structure, with the diiodocuprate located in the cleft formed by the macrocycle. The calculated and experimental metal-ligand bond lengths match reasonably well (Table S4), particularly in case of MeCN as the medium. A good match is also seen for the Cu–S and Cu–I bond lengths as well as the I–Cu–I angle (in MeCN as a medium). In contrast to the crystal structure, the computed structure of **6** reveals two N–H⋯I hydrogen bonding interactions. This is attributed to the absence of intermolecular interactions. The DFT calculations reveal that 0.24 negative charges are transferred from the  $\text{RS}^-$  donor to the  $[\text{CuI}_2]^-$  acceptor (in MeCN medium).

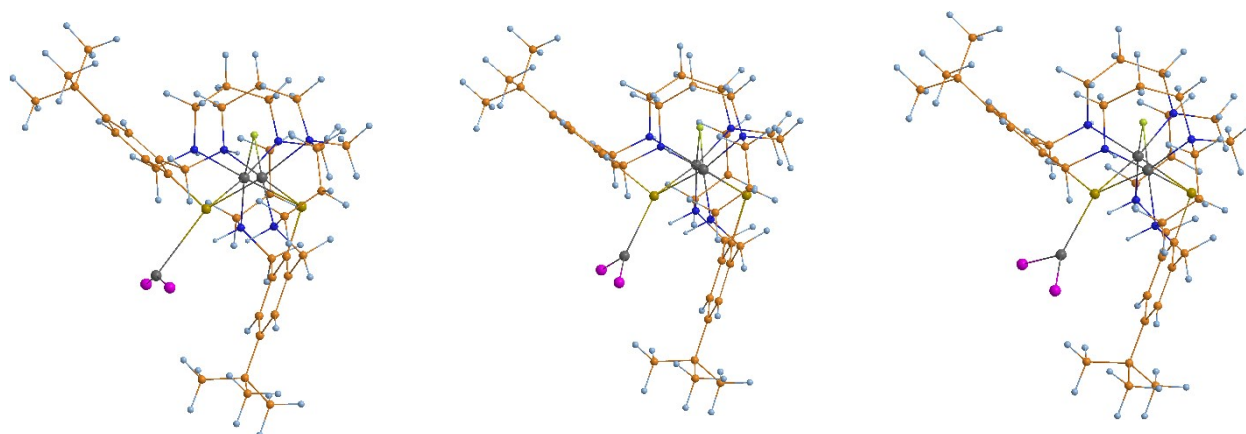

**Figure S34.** DFT optimized geometries of  $[\text{LNi}^{\text{II}}_2(\mu\text{-F})(\text{CuI}_2)]$  (**6**,  $M^S = 5$ , quintet state, M06-D3/LACVP\*/PBF level of theory) with and without solvation (gas phase (left), THF (middle) and MeCN (right)). The cartesian coordinates of the calculated structures are provided in Tables S9a-S9c.

Figure S35 lists the calculated N–H stretching frequencies for complex **6** at the M06-D3/LACVP\*/PBF level of theory (solvation model: THF). The data are discussed in the main text.

calculated  $\nu(\text{NH})$  stretching frequencies /  $\text{cm}^{-1}$

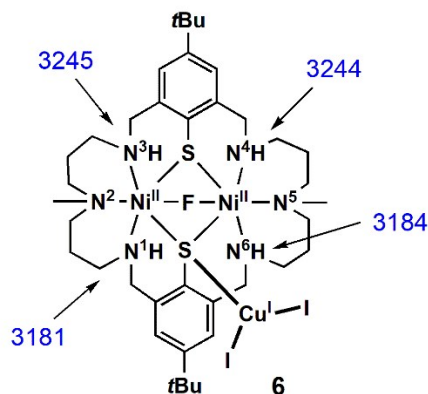

**Figure S35.** Drawing of complex **5** showing the scaled calculated N–H stretching frequencies ( $\text{cm}^{-1}$ ) at the M06-D3/LACVP\*/PBF level of theory (solvation model: THF). The indexes refer to atom numbers utilized in the crystallographic analysis. Note that N2 and N5 are methylated and show no NH frequencies.

**Table S4.** Selected parameters calculated for the complexes  $[\text{LNi}_2(\mu\text{-F})]^+$  (**2**, quintet state),  $[\text{LNi}_2(\mu\text{-F})(\text{CuBr}_2)]^+$  (**5**, quintet state) and  $[\text{LNi}_2(\mu\text{-F})(\text{CuI}_2)]$  (**6**,  $M^S = 5$ , quintet state) with and without solvation (gas phase, THF, and MeCN) at the M06-D3/LACVP\*/PBF level of theory. Where appropriate corresponding data from the X-ray crystal structures for  $[\text{LNi}_2(\mu\text{-F})]\text{BPh}_4$  (**2**)<sup>S10</sup> and  $[\text{LNi}_2(\mu\text{-F})(\text{CuI}_2)]$  (**6**) are included for comparison (bond lengths / Å, angles /°). The parameter Q represents the calculated Mulliken charge on the  $[\text{CuX}_2]^-$  moiety in **5** and **6**.  $\delta Q$  is the calculated charge shift from the thiolate complex **2** to the  $[\text{CuX}_2]^-$  moiety in **5** and **6**.

| Complex<br>$[\text{LNi}_2(\mu\text{-F})]^+$ ( <b>2</b> ) ( $M^S = 5$ )                | DFT / Solvation <sup>a</sup> |        |        |                                                                                                  |
|---------------------------------------------------------------------------------------|------------------------------|--------|--------|--------------------------------------------------------------------------------------------------|
|                                                                                       | gas phase                    | THF    | MeCN   | Crystallographic data for $[\text{LNi}_2(\mu\text{-F})]\text{ClO}_4$ ( <b>2</b> ) <sup>S10</sup> |
| Ni1-S1                                                                                | 2.467                        | 2.517  | 2.486  | 2.466                                                                                            |
| Ni1-S2                                                                                | 2.474                        | 2.459  | 2.500  | 2.550                                                                                            |
| Ni2-S1                                                                                | 2.468                        | 2.510  | 2.475  | 2.472                                                                                            |
| Ni2-S2                                                                                | 2.475                        | 2.462  | 2.498  | 2.465                                                                                            |
| Ni1-F1                                                                                | 2.049                        | 2.076  | 2.061  | 2.042                                                                                            |
| Ni2-F1                                                                                | 2.051                        | 2.080  | 2.065  | 2.047                                                                                            |
| Ni1-S1-Ni2                                                                            | 73.9                         | 75.2   | 75.7   | 76.4                                                                                             |
| Ni1-S2-Ni2                                                                            | 73.6                         | 77.1   | 75.0   | 75.0                                                                                             |
| Ni1-F1-Ni2                                                                            | 92.6                         | 95.2   | 94.9   | 96.6                                                                                             |
|                                                                                       |                              |        |        |                                                                                                  |
|                                                                                       |                              |        |        |                                                                                                  |
| Complex<br>$[\text{LNi}_2(\mu\text{-F})(\text{CuBr}_2)]^+$ ( <b>5</b> ) ( $M^S = 5$ ) | DFT / Solvation <sup>a</sup> |        |        |                                                                                                  |
|                                                                                       | gas phase                    | THF    | MeCN   |                                                                                                  |
| Ni1-S1                                                                                | 2.456                        | 2.482  | 2.504  |                                                                                                  |
| Ni1-S2                                                                                | 2.411                        | 2.444  | 2.468  |                                                                                                  |
| Ni2-S1                                                                                | 2.480                        | 2.498  | 2.515  |                                                                                                  |
| Ni2-S2                                                                                | 2.457                        | 2.449  | 2.499  |                                                                                                  |
| Ni1-F                                                                                 | 2.103                        | 2.096  | 2.094  |                                                                                                  |
| Ni2-F                                                                                 | 2.088                        | 2.095  | 2.093  |                                                                                                  |
| Ni1-S1-Ni2                                                                            | 75.5                         | 77.0   | 77.7   |                                                                                                  |
| Ni1-S2-Ni2                                                                            | 76.8                         | 78.6   | 78.9   |                                                                                                  |
| Ni1-F-Ni2                                                                             | 92.3                         | 95.4   | 97.5   |                                                                                                  |
| Cu-S2                                                                                 | 2.797                        | 2.364  | 2.351  |                                                                                                  |
| Cu-Br1                                                                                | 2.401                        | 2.497  | 2.491  |                                                                                                  |
| Cu-Br2                                                                                | 2.397                        | 2.485  | 2.491  |                                                                                                  |
| Br-Cu-Br                                                                              | 173.3                        | 142.7  | 130.1  |                                                                                                  |
| Q(CuBr <sub>2</sub> )                                                                 | -0.904                       | -1.152 | -1.241 |                                                                                                  |
| $\delta Q(\text{CuBr}_2)$                                                             | +0.096                       | -0.152 | -0.241 |                                                                                                  |
|                                                                                       |                              |        |        |                                                                                                  |
|                                                                                       |                              |        |        |                                                                                                  |
| Complex<br>$[\text{LNi}_2(\mu\text{-F})(\text{CuI}_2)]$ ( <b>6</b> ) ( $M^S = 5$ )    | DFT / Solvation              |        |        |                                                                                                  |
|                                                                                       | gas phase                    | THF    | MeCN   | Crystallographic data for <b>6</b>                                                               |

|                       |        |        |        |        |
|-----------------------|--------|--------|--------|--------|
| Ni1-S1                | 2.459  | 2.459  | 2.478  | 2.421  |
| Ni1-S2                | 2.413  | 2.449  | 2.470  | 2.449  |
| Ni2-S1                | 2.455  | 2.486  | 2.499  | 2.473  |
| Ni2-S2                | 2.482  | 2.456  | 2.467  | 2.482  |
| Ni1-F                 | 2.079  | 2.088  | 2.073  | 2.066  |
| Ni2-F                 | 2.080  | 2.079  | 2.076  | 2.052  |
| Ni1-S1-Ni2            | 75.0   | 76.6   | 77.2   | 77.7   |
| Ni1-S2-Ni2            | 75.3   | 77.3   | 76.5   | 77.0   |
| Ni1-F-Ni2             | 92.0   | 94.6   | 95.8   | 96.4   |
| Cu-S2                 | 2.826  | 2.384  | 2.349  | 2.296  |
| Cu-I1                 | 2.541  | 2.612  | 2.622  | 2.547  |
| Cu-I2                 | 2.546  | 2.607  | 2.621  | 2.511  |
| I-Cu-I                | 164.0° | 140.4° | 131.5° | 128.0° |
| Q(CuI <sub>2</sub> )  | -0.958 | -1.161 | -1.242 | -1.222 |
| δQ(CuI <sub>2</sub> ) | +0.042 | -0.161 | -0.242 | -0.222 |

a) The cartesian coordinates of the calculated structures are provided in Tables S7a-c (for **2**), Tables S8a-c (for **5**), and S9a-c (for **6**).

**Table S5a.** Cartesian coordinates of geometry optimized [LCo<sup>I</sup>Co<sup>III</sup>(μ-F)]<sup>2+</sup> (M<sup>S</sup> = 4, quartet state, gas phase).

| final geometry: angstroms |               |               |               |  |
|---------------------------|---------------|---------------|---------------|--|
| atom                      | x             | y             | z             |  |
| H1                        | -1.4739354700 | 9.9234891613  | 5.1580763002  |  |
| H8B                       | 0.8510235949  | 9.5353509991  | 4.6858686159  |  |
| H9A                       | 1.2635457710  | 11.7012892245 | 3.4111334970  |  |
| H9B                       | 1.7999299140  | 10.2439060883 | 2.6191358040  |  |
| H10A                      | 0.7511089844  | 11.5684100446 | 0.9268866519  |  |
| H10B                      | -0.1930146929 | 10.1283514557 | 1.2228744903  |  |
| H11A                      | -1.4895065427 | 14.0082820858 | 2.0490027468  |  |
| H11B                      | -0.0193168990 | 13.6083857450 | 1.1280468479  |  |
| H11C                      | -0.0457714920 | 13.4534099289 | 2.9080228251  |  |
| H12A                      | -1.2828348529 | 12.3002546276 | -0.2195583347 |  |
| H12B                      | -2.7478199335 | 12.5851532413 | 0.7446920285  |  |
| H3                        | -1.6633789933 | 9.3671503793  | 2.2518873423  |  |
| H13A                      | -3.0344467801 | 10.7001237693 | -0.7395122197 |  |
| H13B                      | -1.6199256603 | 9.8760636380  | -0.1608839811 |  |
| H14A                      | -4.2420369077 | 10.3547074232 | 1.3593457864  |  |
| H14B                      | -3.5874206083 | 8.8201586033  | 0.7617048043  |  |
| H15A                      | -2.9508693128 | 7.5383683533  | 2.6973804544  |  |
| H15B                      | -2.6541638151 | 8.4196416730  | 4.2095969676  |  |
| H19                       | -8.4371666717 | 9.2725590251  | 3.3969593586  |  |
| H21                       | -5.0628380253 | 6.9497062968  | 2.1495367931  |  |
| H22A                      | -8.2518183201 | 11.0508293517 | 4.7060758785  |  |
| H22B                      | -6.8226185250 | 11.3626462921 | 5.7064604275  |  |
| H4                        | -7.4275834116 | 13.1378444647 | 4.2082589179  |  |
| H23A                      | -6.3375932493 | 11.5857655550 | 1.9921610304  |  |
| H23B                      | -8.0782832916 | 11.6812033123 | 2.3003938897  |  |
| H24A                      | -7.4765662513 | 13.3316463543 | 0.6537002730  |  |
| H24B                      | -8.0343290433 | 14.1462913030 | 2.0837423592  |  |
| H25A                      | -6.0583454746 | 15.2192508800 | 0.9671509866  |  |
| H25B                      | -5.1217102638 | 13.7268131344 | 1.1861796962  |  |
| H26A                      | -3.4140804577 | 14.8442323710 | 2.1468439168  |  |
| H26B                      | -3.6424859885 | 15.9343868159 | 3.5278284875  |  |
| H26C                      | -4.2928662680 | 16.3829039108 | 1.9239389681  |  |
| H27A                      | -7.3234830687 | 15.3977462211 | 3.4695422360  |  |
| H6                        | -5.7405624799 | 13.2400296483 | 6.6133803755  |  |
| H27B                      | -6.3126706911 | 16.7242900625 | 2.9150866942  |  |
| H28A                      | -5.0172386049 | 16.5375987239 | 5.1323522031  |  |

|      |               |               |               |
|------|---------------|---------------|---------------|
| H28B | -6.6837013735 | 17.0360226840 | 5.2180236398  |
| H29A | -6.5241462711 | 15.5220090057 | 6.9877157321  |
| H29B | -7.3349365185 | 14.6065678779 | 5.7240460661  |
| H30A | -4.5688302121 | 14.9562234601 | 7.8145951756  |
| H30B | -3.6897851336 | 15.2949761426 | 6.3175724732  |
| H32A | -4.6177704270 | 11.3270693198 | 10.3362966492 |
| H32B | -3.9157988552 | 10.0754310316 | 11.3711149401 |
| H32C | -4.0188986824 | 9.8150312043  | 9.6169017582  |
| H45  | -3.9345460017 | 13.2132651474 | 9.2244927747  |
| H33A | -2.9314058032 | 13.0478180859 | 11.2748728794 |
| H33B | -1.1934696956 | 12.6871179490 | 11.2206688402 |
| H33C | -2.2596905690 | 11.7821064420 | 12.3138062072 |
| H34A | -0.3662862322 | 10.4318074069 | 10.3581399338 |
| H34B | -1.5290275135 | 9.2524949654  | 9.6896134888  |
| H34C | -1.5172095307 | 9.6147645564  | 11.4194004411 |
| H36A | -6.5727811304 | 5.2679560876  | 2.1454558824  |
| H36B | -8.2282903235 | 4.9817158662  | 1.5925530351  |
| H36C | -7.9307397308 | 5.4803928485  | 3.2699185035  |
| H37A | -6.2568082352 | 6.9363278957  | 0.1962777019  |
| H5   | -0.6393734593 | 10.6819224761 | 8.1596798455  |
| H37B | -7.3841045354 | 8.3007847638  | 0.0193744084  |
| H37C | -7.9235923174 | 6.6436955652  | -0.3211157194 |
| H38A | -9.4081302688 | 8.5030221541  | 1.5340227001  |
| H38B | -9.6279562458 | 7.3790074557  | 2.9035451109  |
| H38C | -9.8234720675 | 6.8111437003  | 1.2404784079  |
| H7A  | 0.0895017069  | 12.3900205124 | 5.1074561524  |
| H7B  | 0.4554304096  | 10.9984488554 | 6.1474849213  |
| H8A  | -0.2428729892 | 9.0122863411  | 3.4274281163  |
| Co1  | -2.4449839485 | 11.3915481147 | 3.4842130104  |
| Co2  | -4.8402663952 | 13.0817348713 | 4.1719532842  |
| S1   | -2.3887489773 | 13.4579457288 | 4.5680458692  |
| S2   | -4.0489023711 | 10.7821114010 | 5.0334070193  |
| F1   | -3.9072921368 | 12.1909299013 | 2.5539164438  |
| N1   | -0.9528785054 | 10.6201777913 | 4.6146304247  |
| N2   | -1.1063028707 | 11.9350860729 | 1.8536229720  |
| N3   | -2.6254944977 | 9.6215026070  | 2.4730672633  |
| N4   | -6.8254154931 | 12.3848185651 | 3.8672050069  |
| N5   | -5.3638094550 | 14.8403994678 | 2.9290411839  |
| N6   | -5.3443740912 | 14.0183038665 | 6.0782397766  |
| C1   | -2.3096337718 | 12.9455743949 | 6.2659692134  |
| C2   | -3.2234312602 | 13.4072238500 | 7.2213820498  |
| C3   | -3.2156702513 | 12.8411335981 | 8.4918376832  |
| C4   | -2.3290101038 | 11.8201583380 | 8.8602382914  |
| C5   | -1.3841226843 | 11.4375705865 | 7.9120359583  |
| C6   | -1.3599017813 | 11.9949900722 | 6.6354542950  |
| C7   | -0.3555569861 | 11.5405214329 | 5.6386399997  |
| C8   | 0.1549358731  | 9.9099770229  | 3.9215164390  |
| C9   | 0.8960139752  | 10.7845361912 | 2.9306459313  |
| C10  | 0.1029225081  | 11.0825720089 | 1.6751875300  |
| C11  | -0.6354423910 | 13.3279352768 | 1.9964575485  |
| C12  | -1.9114616974 | 11.8962768984 | 0.5922802340  |
| C13  | -2.4377807250 | 10.5347517467 | 0.1677745270  |
| C14  | -3.3151792851 | 9.8068276451  | 1.1677842321  |
| C15  | -3.1769138875 | 8.4665523331  | 3.2437566399  |
| C16  | -4.6484709471 | 8.6215357424  | 3.4065135917  |
| C17  | -5.1517616466 | 9.7241491213  | 4.1145220022  |
| C18  | -6.5356529664 | 9.9478244557  | 4.0903170437  |
| C19  | -7.3672550551 | 9.0656944113  | 3.3961315201  |
| C20  | -6.8833056349 | 7.9757115797  | 2.6764999104  |
| C21  | -5.5014385095 | 7.7760784834  | 2.7117273828  |
| C22  | -7.1591779192 | 11.1782477227 | 4.6770711168  |
| C23  | -7.1243291360 | 12.2187870855 | 2.4228891435  |
| C24  | -7.1973660437 | 13.5470036215 | 1.6943226703  |
| C25  | -5.9076649263 | 14.3503772152 | 1.6334266925  |
| C26  | -4.1105926729 | 15.5457938014 | 2.6182145526  |
| C27  | -6.3083777154 | 15.8099467475 | 3.5352782021  |
| C28  | -6.0442480616 | 16.1734208177 | 4.9867636656  |
| C29  | -6.3767307742 | 15.0792360287 | 5.9898956322  |
| C30  | -4.1893930578 | 14.4999089764 | 6.8862022330  |
| C31  | -2.4257106146 | 11.1758312193 | 10.2370115050 |
| C32  | -3.8258717346 | 10.5684239943 | 10.3941047968 |
| C33  | -2.1911454794 | 12.2380917720 | 11.3172449118 |
| C34  | -1.3985688285 | 10.0606187899 | 10.4238546639 |

|     |               |              |              |
|-----|---------------|--------------|--------------|
| C35 | -7.7579323229 | 7.0884659405 | 1.8010847009 |
| C36 | -7.6076956108 | 5.6248423670 | 2.2304394145 |
| C37 | -7.2983161488 | 7.2535656757 | 0.3442667001 |
| C38 | -9.2321420095 | 7.4750956066 | 1.8831703890 |

**Table S5b.** Cartesian coordinates of geometry optimized [LCo<sup>II</sup>Co<sup>III</sup>( $\mu$ -F)]<sup>2+</sup> (M<sup>S</sup> = 4, quartet state, THF solution).

| final geometry: |               | angstroms     |               |
|-----------------|---------------|---------------|---------------|
| atom            | x             | y             | z             |
| H1              | -1.1708113977 | 9.8379326148  | 5.2916801623  |
| H8B             | 1.1478145794  | 9.6335325947  | 4.7272109680  |
| H9A             | 1.2870354070  | 11.8044593046 | 3.3524070289  |
| H9B             | 1.9847804792  | 10.3646981745 | 2.6614058068  |
| H10A            | 0.8651736440  | 11.4073434559 | 0.8586689540  |
| H10B            | -0.0021273204 | 9.9394464967  | 1.2906109106  |
| H11A            | -1.6173235471 | 13.7530209542 | 1.8277319440  |
| H11B            | -0.0766767164 | 13.4802566412 | 0.9668415546  |
| H11C            | -0.1474744943 | 13.3761698143 | 2.7500780823  |
| H12A            | -1.1878287651 | 11.9606653629 | -0.3748509320 |
| H12B            | -2.6842879398 | 12.2150816260 | 0.5481050797  |
| H3              | -1.7147030533 | 8.9077896139  | 2.2832824897  |
| H13A            | -2.7557732920 | 10.2287741754 | -0.8675035818 |
| H13B            | -1.3968896050 | 9.4874045700  | -0.0685008725 |
| H14A            | -4.1259524429 | 10.1300513030 | 1.1846129514  |
| H14B            | -3.5472843748 | 8.5337215561  | 0.6615989652  |
| H15A            | -3.2402039186 | 7.3243497490  | 2.8383219300  |
| H15B            | -2.9525377642 | 8.3406598692  | 4.2594471733  |
| H19             | -8.6179817970 | 9.4927948622  | 2.8645602132  |
| H21             | -5.2524122587 | 6.9679423060  | 2.0081105335  |
| H22A            | -8.4250831512 | 11.3332571727 | 4.1408895649  |
| H22B            | -7.1636226206 | 11.4147234019 | 5.3847072485  |
| H4              | -7.3050428356 | 13.2777229210 | 3.8941084399  |
| H23A            | -6.0717754017 | 11.7144842033 | 1.7783988396  |
| H23B            | -7.8327951265 | 11.9342742271 | 1.8927016685  |
| H24A            | -6.7891021488 | 13.5815633236 | 0.3785285873  |
| H24B            | -7.6700458035 | 14.3305627378 | 1.6798872134  |
| H25A            | -5.5701337257 | 15.5102280659 | 1.2183048891  |
| H25B            | -4.6283836029 | 14.0106368934 | 1.3784966732  |
| H26A            | -3.1970757145 | 15.2135916666 | 2.7129675945  |
| H26B            | -3.7390286706 | 15.9939776738 | 4.2122205924  |
| H26C            | -4.2520163935 | 16.6465532451 | 2.6301275821  |
| H27A            | -7.3095019780 | 15.1761653371 | 3.4551346966  |
| H6              | -5.7344910222 | 12.7249764232 | 6.4405450946  |
| H27B            | -6.3527978764 | 16.6266970992 | 3.2584757616  |
| H28A            | -5.4723431126 | 16.3312075481 | 5.6170779174  |
| H28B            | -7.2050325803 | 16.4877656394 | 5.4935314018  |
| H29A            | -6.8373620012 | 14.7384651361 | 7.0697599266  |
| H29B            | -7.4872420656 | 13.9929375518 | 5.6288537510  |
| H30A            | -4.8916911476 | 14.5144540304 | 7.8170150896  |
| H30B            | -3.9642238881 | 15.0565308446 | 6.4095504966  |
| H32A            | -4.0499866143 | 11.4304523071 | 10.8056100187 |
| H32B            | -3.0289165203 | 10.5369772948 | 11.9475522655 |
| H32C            | -3.2699682418 | 9.9161231593  | 10.2974813142 |
| H45             | -3.8557789435 | 13.1346900859 | 9.3209368888  |
| H33A            | -2.6107433822 | 13.5339790862 | 11.2004378949 |
| H33B            | -0.8525013675 | 13.4518646654 | 10.9546762603 |
| H33C            | -1.6014357141 | 12.6158856043 | 12.3350868710 |
| H34A            | 0.2668137971  | 11.2413215662 | 10.3904735054 |
| H34B            | -0.7188899371 | 9.7850700601  | 10.0933608525 |
| H34C            | -0.5946801927 | 10.4614052893 | 11.7282310488 |
| H36A            | -6.8003436648 | 5.3767092483  | 1.8208790197  |
| H36B            | -8.4190666108 | 5.1433577812  | 1.1359200997  |
| H36C            | -8.2370851175 | 5.6443927116  | 2.8328653183  |
| H37A            | -6.2637967750 | 7.0377569482  | -0.0903153237 |
| H5              | -0.2770444686 | 11.0131459623 | 8.2279754163  |
| H37B            | -7.3400953748 | 8.4247496944  | -0.3677322774 |
| H37C            | -7.8918349080 | 6.7762978030  | -0.7491594977 |
| H38A            | -9.4669544401 | 8.6969709521  | 0.9729954842  |
| H38B            | -9.8260887782 | 7.5972586775  | 2.3296055495  |
| H38C            | -9.9106107416 | 7.0118962734  | 0.6566877187  |



|     |               |               |               |
|-----|---------------|---------------|---------------|
| H7A | 0.0702228535  | 12.4776930373 | 5.0466029922  |
| H7B | 0.6396386534  | 11.2315886931 | 6.1615253930  |
| H8A | 0.0224148425  | 9.0007763985  | 3.5288034939  |
| Co1 | -2.3957727294 | 11.2200912010 | 3.4025341056  |
| Co2 | -4.8158456236 | 12.9477266367 | 4.1634174543  |
| S1  | -2.6023904409 | 13.3825830223 | 4.6246730933  |
| S2  | -4.3945055339 | 10.8120065370 | 4.9565248759  |
| F1  | -4.0494947058 | 12.2590781643 | 2.5346589754  |
| N1  | -0.7516347781 | 10.5660022241 | 4.7016300920  |
| N2  | -1.0309241532 | 11.7316426474 | 1.7225548599  |
| N3  | -2.6422928170 | 9.3186303149  | 2.4216638993  |
| N4  | -6.7278733403 | 12.4825490181 | 3.6139608310  |
| N5  | -5.2254246787 | 14.8465879102 | 3.1940425274  |
| N6  | -5.4323878331 | 13.5974163859 | 5.9908139473  |
| C1  | -2.3745159711 | 12.8211276481 | 6.2861750458  |
| C2  | -3.2919263047 | 13.2225336086 | 7.2646025644  |
| C3  | -3.1292081597 | 12.7983315661 | 8.5779386478  |
| C4  | -2.0518194365 | 11.9946276822 | 8.9677634672  |
| C5  | -1.1459566452 | 11.6211498260 | 7.9745839325  |
| C6  | -1.2892209644 | 12.0162733749 | 6.6427225482  |
| C7  | -0.2540005123 | 11.6102150066 | 5.6379915464  |
| C8  | 0.3854850092  | 9.9323169102  | 3.9891932509  |
| C9  | 1.0226802579  | 10.8224821710 | 2.9330749021  |
| C10 | 0.2315233776  | 10.9523584361 | 1.6423604021  |
| C11 | -0.6933295206 | 13.1625460498 | 1.8252148296  |
| C12 | -1.8012815639 | 11.5671532577 | 0.4568446758  |
| C13 | -2.2527409828 | 10.1566504782 | 0.1079731848  |
| C14 | -3.2285011690 | 9.5066040517  | 1.0720966123  |
| C15 | -3.3918768094 | 8.3337743982  | 3.2510435352  |
| C16 | -4.8619249549 | 8.6394104405  | 3.2681218878  |
| C17 | -5.4008308151 | 9.7626776232  | 3.9225664658  |
| C18 | -6.7642639031 | 10.0389660523 | 3.7654237098  |
| C19 | -7.5693283313 | 9.2159725539  | 2.9786010208  |
| C20 | -7.0617640321 | 8.0956332601  | 2.3272382778  |
| C21 | -5.7016114555 | 7.8278628920  | 2.5103099134  |
| C22 | -7.3368802273 | 11.3063875900 | 4.3043297794  |
| C23 | -6.8585434661 | 12.3865795527 | 2.1341878023  |
| C24 | -6.7638699932 | 13.7443014808 | 1.4656572896  |
| C25 | -5.5063198311 | 14.5466963783 | 1.7527985280  |
| C26 | -4.0358600285 | 15.7253949774 | 3.1946336235  |
| C27 | -6.3612562121 | 15.6398337229 | 3.7518101525  |
| C28 | -6.3713350727 | 15.8115837597 | 5.2568849159  |
| C29 | -6.6048722400 | 14.5199885495 | 6.0171490995  |
| C30 | -4.3847533185 | 14.1706071283 | 6.9026801624  |
| C31 | -1.8914118794 | 11.6030449683 | 10.4330189752 |
| C32 | -3.1338694315 | 10.8303947572 | 10.8929553500 |
| C33 | -1.7334277001 | 12.8768939522 | 11.2750156868 |
| C34 | -0.6640819250 | 10.7237785095 | 10.6635726816 |
| C35 | -7.8883125672 | 7.2343081765  | 1.3794548563  |
| C36 | -7.8269394266 | 5.7675146380  | 1.8204674365  |
| C37 | -7.3079263502 | 7.3763404837  | -0.0358553027 |
| C38 | -9.3524887988 | 7.6665583004  | 1.3398687340  |

**Table S5c.** Cartesian coordinates of geometry optimized [LCo<sup>II</sup>Co<sup>III</sup>( $\mu$ -F)]<sup>2+</sup> ( $M^S = 4$ , quartet state, MeCN solution).

| final geometry: angstroms |               |               |               |
|---------------------------|---------------|---------------|---------------|
| atom                      | x             | y             | z             |
| H1                        | -1.2185787811 | 9.7266777055  | 5.3646248711  |
| H8B                       | 1.0843249864  | 9.4953314033  | 4.7868640034  |
| H9A                       | 1.2756526853  | 11.6869132376 | 3.4553233961  |
| H9B                       | 1.9503751757  | 10.2445021280 | 2.7480380844  |
| H10A                      | 0.8889249729  | 11.3511818614 | 0.9516976148  |
| H10B                      | -0.0155646202 | 9.8929130422  | 1.3338114345  |
| H11A                      | -1.5649369698 | 13.7291537967 | 1.9177575272  |
| H11B                      | -0.0249294834 | 13.4374363837 | 1.0594852862  |
| H11C                      | -0.1061521106 | 13.3103732382 | 2.8416110105  |
| H12A                      | -1.1604895446 | 11.9727021728 | -0.3078943922 |
| H12B                      | -2.6596747588 | 12.2206916824 | 0.6117938756  |
| H3                        | -1.7104849244 | 8.8720296212  | 2.2748552524  |
| H13A                      | -2.7426271982 | 10.2645701964 | -0.8450976113 |

|      |               |               |               |
|------|---------------|---------------|---------------|
| H13B | -1.3869752895 | 9.4986704218  | -0.0614233489 |
| H14A | -4.1218361324 | 10.1100932314 | 1.1944035158  |
| H14B | -3.5289870716 | 8.5262367908  | 0.6478692730  |
| H15A | -3.2243511706 | 7.2912833954  | 2.8276120360  |
| H15B | -2.9279757093 | 8.2995209606  | 4.2539603083  |
| H19  | -8.5981781379 | 9.4728694591  | 2.8740873919  |
| H21  | -5.2276385268 | 6.9671749056  | 1.9688961928  |
| H22A | -8.4145179005 | 11.2708660303 | 4.2160347637  |
| H22B | -7.1442356221 | 11.3319782134 | 5.4535899604  |
| H4   | -7.3155227952 | 13.2157824175 | 3.9895375517  |
| H23A | -6.0705818417 | 11.6870717968 | 1.8536698362  |
| H23B | -7.8318671832 | 11.9063050929 | 1.9738987525  |
| H24A | -6.7854701741 | 13.5640797659 | 0.4728495965  |
| H24B | -7.6706560394 | 14.3011461073 | 1.7805599693  |
| H25A | -5.5758892226 | 15.4917985371 | 1.3377713498  |
| H25B | -4.6276385965 | 13.9936223261 | 1.4808409358  |
| H26A | -3.2117253809 | 15.1996353731 | 2.8246909683  |
| H26B | -3.7561269808 | 15.9421713130 | 4.3434902172  |
| H26C | -4.2819678191 | 16.6231020280 | 2.7769917468  |
| H27A | -7.3244715183 | 15.1054926108 | 3.5667030303  |
| H6   | -5.6925632970 | 12.6610068938 | 6.5546388479  |
| H27B | -6.3830992018 | 16.5682564092 | 3.3856037041  |
| H28A | -5.5156658517 | 16.2727431514 | 5.7446317583  |
| H28B | -7.2518324346 | 16.3872595116 | 5.6145578779  |
| H29A | -6.8323364917 | 14.6367388984 | 7.1828504718  |
| H29B | -7.4816466010 | 13.8921249969 | 5.7400386109  |
| H30A | -4.8562805557 | 14.5070189841 | 7.8750875402  |
| H30B | -3.9530206052 | 15.0156165268 | 6.4398346572  |
| H32A | -3.9144026304 | 11.6118041764 | 10.9867427147 |
| H32B | -2.8540443220 | 10.8113031723 | 12.1641948394 |
| H32C | -3.1392249716 | 10.0671271637 | 10.5719191270 |
| H45  | -3.7773094956 | 13.2132909337 | 9.4015260397  |
| H33A | -2.4724901883 | 13.7422475230 | 11.1986069243 |
| H33B | -0.7233582791 | 13.6492969877 | 10.8957286187 |
| H33C | -1.4175012512 | 12.9082270554 | 12.3575044190 |
| H34A | 0.3858551460  | 11.4060897042 | 10.4415794416 |
| H34B | -0.6036996240 | 9.9302856029  | 10.2921184386 |
| H34C | -0.4198672055 | 10.7261242518 | 11.8675809602 |
| H36A | -6.7878699616 | 5.3945126412  | 1.7172470507  |
| H36B | -8.3830166858 | 5.1966470395  | 0.9662282523  |
| H36C | -8.2588055928 | 5.6351768259  | 2.6867923755  |
| H37A | -6.1861971359 | 7.0988751579  | -0.1240109742 |
| H5   | -0.2479071086 | 11.0016349243 | 8.3158838573  |
| H37B | -7.2239422390 | 8.5193348189  | -0.3753270894 |
| H37C | -7.8009709892 | 6.8994653770  | -0.8380502706 |
| H38A | -9.3939504102 | 8.7706026910  | 0.9107453914  |
| H38B | -9.8075571434 | 7.6255898048  | 2.2120840283  |
| H38C | -9.8492749960 | 7.1036240959  | 0.5155277788  |
| H7A  | 0.0722735832  | 12.3453375723 | 5.1043118245  |
| H7B  | 0.6095957998  | 11.0933073702 | 6.2271936470  |
| H8A  | -0.0423918570 | 8.9013642690  | 3.5713707282  |
| Co1  | -2.3792001800 | 11.1637832364 | 3.4290509045  |
| Co2  | -4.8122102836 | 12.8949748882 | 4.2508555624  |
| S1   | -2.5831417327 | 13.3188135727 | 4.6868729347  |
| S2   | -4.3766683777 | 10.7432184531 | 5.0026265335  |
| F1   | -4.0465520727 | 12.2257360224 | 2.6209940749  |
| N1   | -0.7998380498 | 10.4554125644 | 4.7753492190  |
| N2   | -1.0170781892 | 11.7001230226 | 1.7859062736  |
| N3   | -2.6350398603 | 9.2889394544  | 2.4239398000  |
| N4   | -6.7253562342 | 12.4328294066 | 3.6994969021  |
| N5   | -5.2346699708 | 14.8029565189 | 3.3051794347  |
| N6   | -5.4156114225 | 13.5323190939 | 6.0840106987  |
| C1   | -2.3613061641 | 12.7672358416 | 6.3522766546  |
| C2   | -3.2586579442 | 13.2080917423 | 7.3331869300  |
| C3   | -3.0670120910 | 12.8418412154 | 8.6593596620  |
| C4   | -1.9798658698 | 12.0570813053 | 9.0586142742  |
| C5   | -1.1122841179 | 11.6144038655 | 8.0591454167  |
| C6   | -1.2864970923 | 11.9493687815 | 6.7136308666  |
| C7   | -0.2753568088 | 11.4929935043 | 5.7042858038  |
| C8   | 0.3310484403  | 9.8192607822  | 4.0501771211  |
| C9   | 0.9948778863  | 10.7188594141 | 3.0154902162  |
| C10  | 0.2306273424  | 10.8927343000 | 1.7126231535  |
| C11  | -0.6520836400 | 13.1217143708 | 1.9112373920  |

|     |               |               |               |
|-----|---------------|---------------|---------------|
| C12 | -1.7821086032 | 11.5662986067 | 0.5114625301  |
| C13 | -2.2409727594 | 10.1661864165 | 0.1289684199  |
| C14 | -3.2196208818 | 9.4943132963  | 1.0764504398  |
| C15 | -3.3763792558 | 8.2965891838  | 3.2500188464  |
| C16 | -4.8457663012 | 8.6014181820  | 3.2774557328  |
| C17 | -5.3866015327 | 9.7092524883  | 3.9573519895  |
| C18 | -6.7507748617 | 9.9879803039  | 3.8048550498  |
| C19 | -7.5510620014 | 9.1891506651  | 2.9880687941  |
| C20 | -7.0377408509 | 8.0916811087  | 2.3035143560  |
| C21 | -5.6811915201 | 7.8120713603  | 2.4926902275  |
| C22 | -7.3254634282 | 11.2419547290 | 4.3728789612  |
| C23 | -6.8567802988 | 12.3550660708 | 2.2185572151  |
| C24 | -6.7635395174 | 13.7186107928 | 1.5615376109  |
| C25 | -5.5090929401 | 14.5212069723 | 1.8593632904  |
| C26 | -4.0535432199 | 15.6924732839 | 3.3210256939  |
| C27 | -6.3821141936 | 15.5766476435 | 3.8696535292  |
| C28 | -6.4002434616 | 15.7341458938 | 5.3764509380  |
| C29 | -6.6060513241 | 14.4316493200 | 6.1261151698  |
| C30 | -4.3610662242 | 14.1410947106 | 6.9628637015  |
| C31 | -1.7692895673 | 11.7654197757 | 10.5404998421 |
| C32 | -2.9923298549 | 11.0240124476 | 11.0938393044 |
| C33 | -1.5891366110 | 13.0949829699 | 11.2871552297 |
| C34 | -0.5306416798 | 10.9080069302 | 10.7894097441 |
| C35 | -7.8471530372 | 7.2730828205  | 1.3055070344  |
| C36 | -7.8121077736 | 5.7911068531  | 1.6943909629  |
| C37 | -7.2242315224 | 7.4576566523  | -0.0860959412 |
| C38 | -9.3042589537 | 7.7249211033  | 1.2396417379  |

**Table S6a.** Cartesian coordinates of geometry optimized [LCo<sup>I</sup>Co<sup>III</sup>( $\mu$ -F)(Cu<sup>I</sup>Br<sub>2</sub>)]<sup>+</sup> (**4**, M<sup>S</sup> = 4, quartet state, gas phase).

| final geometry: angstroms |               |               |              |
|---------------------------|---------------|---------------|--------------|
| atom                      | x             | y             | z            |
| Co1                       | -2.3969529441 | 11.4020649407 | 3.4438263315 |
| Co2                       | -4.7830878016 | 13.0505174545 | 4.1669730998 |
| S1                        | -2.5766116095 | 13.5835680677 | 4.6773380570 |
| S2                        | -4.3558880329 | 10.9776021597 | 4.9632212798 |
| F1                        | -3.9894779806 | 12.3956445944 | 2.5385968965 |
| Cu1                       | -4.8057181396 | 9.9938182571  | 7.5328086674 |
| Br1                       | -2.9405506965 | 8.5700661521  | 7.0261781382 |
| Br2                       | -6.7170972138 | 11.2962653386 | 8.0705155513 |
| N1                        | -0.8365509500 | 10.6587460926 | 4.7338844895 |
| N2                        | -1.0209623140 | 11.8151112343 | 1.7395795842 |
| N3                        | -2.6690080898 | 9.4957904097  | 2.4759645703 |
| N4                        | -6.6829002015 | 12.5163365896 | 3.6101270462 |
| N5                        | -5.2474871961 | 14.9333864732 | 3.1259711642 |
| N6                        | -5.4329328067 | 13.6683480007 | 5.9701469191 |
| C1                        | -2.3691144657 | 12.9488396651 | 6.3225429009 |
| C2                        | -3.3271272347 | 13.2619544957 | 7.2906717131 |
| C3                        | -3.2366497595 | 12.6981968424 | 8.5602463358 |
| C4                        | -2.1949898592 | 11.8354136418 | 8.9173342698 |
| C5                        | -1.2264553081 | 11.5855314337 | 7.9465793914 |
| C6                        | -1.3019986423 | 12.1134864056 | 6.6598486057 |
| C7                        | -0.2857903068 | 11.6976829516 | 5.6455325658 |
| C8                        | 0.2563428428  | 9.9464712618  | 4.0441539953 |
| C9                        | 0.9564899047  | 10.7827191887 | 2.9801900337 |
| C10                       | 0.1943165229  | 10.9709629826 | 1.6768146870 |
| C11                       | -0.6203429133 | 13.2242792674 | 1.8396627537 |
| C12                       | -1.8080035541 | 11.6781546029 | 0.4854307092 |
| C13                       | -2.3234441457 | 10.2867102591 | 0.1431115325 |
| C14                       | -3.2819067598 | 9.6573220109  | 1.1383381754 |
| C15                       | -3.3423892657 | 8.4631019977  | 3.3122217333 |
| C16                       | -4.8167747716 | 8.7094815793  | 3.3839176452 |
| C17                       | -5.3603469209 | 9.8574135825  | 3.9902564877 |
| C18                       | -6.7353171716 | 10.0815649739 | 3.8589979436 |
| C19                       | -7.5454789479 | 9.1755251289  | 3.1756914041 |
| C20                       | -7.0378704160 | 8.0105886631  | 2.6075097290 |
| C21                       | -5.6603343628 | 7.8124825556  | 2.7341778600 |
| C22                       | -7.3160620336 | 11.3693755039 | 4.3299642907 |
| C23                       | -6.8016868939 | 12.3834312058 | 2.1377787052 |
| C24                       | -6.7731048849 | 13.7336810437 | 1.4492953944 |

|      |               |               |               |
|------|---------------|---------------|---------------|
| C25  | -5.5455848287 | 14.5933091136 | 1.7038991408  |
| C26  | -4.0627296748 | 15.8071412277 | 3.0912396948  |
| C27  | -6.3713788185 | 15.7184497658 | 3.6949034267  |
| C28  | -6.3627664089 | 15.8773222389 | 5.2031557173  |
| C29  | -6.5971916516 | 14.5873497221 | 5.9677085493  |
| C30  | -4.4305904247 | 14.2053886818 | 6.9503154047  |
| C31  | -2.1567367135 | 11.2031638461 | 10.3047635218 |
| C32  | -3.4804388681 | 10.4811080223 | 10.5884935611 |
| C33  | -1.9464430387 | 12.3121440086 | 11.3425228425 |
| C34  | -1.0272171708 | 10.1829792192 | 10.4371772180 |
| C35  | -7.8874835050 | 7.0145336941  | 1.8243641836  |
| C36  | -7.8204278140 | 5.6422379976  | 2.5049018458  |
| C37  | -7.3444028330 | 6.9086725689  | 0.3926242973  |
| C38  | -9.3514007791 | 7.4433979477  | 1.7459390281  |
| H1   | -1.3388323810 | 9.9884102769  | 5.3422389904  |
| H3   | -1.7173467986 | 9.1562328236  | 2.3298496644  |
| H4   | -7.2362491172 | 13.3309669876 | 3.8719881585  |
| H6   | -5.7691779447 | 12.7965042275 | 6.4205031861  |
| H57  | -4.0214184047 | 12.9276270305 | 9.2823447291  |
| H5   | -0.4000835323 | 10.9114378007 | 8.1687518440  |
| H7A  | 0.0492897414  | 12.5511853662 | 5.0410545629  |
| H7B  | 0.6011505061  | 11.2903438277 | 6.1582275352  |
| H8A  | -0.1535776172 | 9.0251552937  | 3.6014349952  |
| H8B  | 0.9979918590  | 9.6126927433  | 4.7882080467  |
| H9A  | 1.2779683303  | 11.7465079937 | 3.3997156807  |
| H9B  | 1.8894055415  | 10.2639223061 | 2.7182492721  |
| H10A | 0.8716471497  | 11.3900245742 | 0.9087129713  |
| H10B | -0.0889366190 | 9.9764321363  | 1.3086784484  |
| H11A | -1.5172351276 | 13.8539001296 | 1.8552031091  |
| H11B | 0.0064261811  | 13.5183092218 | 0.9791565703  |
| H11C | -0.0644860331 | 13.4086161105 | 2.7644089414  |
| H12A | -1.1919040458 | 12.0433189444 | -0.3581719857 |
| H12B | -2.6639913942 | 12.3585921714 | 0.5902681265  |
| H13A | -2.8565944895 | 10.3821532309 | -0.8132679076 |
| H13B | -1.4957715083 | 9.5929771713  | -0.0705409916 |
| H14A | -4.1775512282 | 10.2805693713 | 1.2572428546  |
| H14B | -3.6158005790 | 8.6785129820  | 0.7546333658  |
| H15A | -3.1682655734 | 7.4706668572  | 2.8675056080  |
| H15B | -2.8843827103 | 8.4661330133  | 4.3118717003  |
| H19  | -8.6057640671 | 9.4108370078  | 3.0842545325  |
| H21  | -5.2059887845 | 6.9293297188  | 2.2814990233  |
| H22A | -8.3979803125 | 11.3875369168 | 4.1264127436  |
| H22B | -7.1782179512 | 11.5080567182 | 5.4122818082  |
| H23A | -5.9815329734 | 11.7453109015 | 1.7950954207  |
| H23B | -7.7471679109 | 11.8726931268 | 1.8970455567  |
| H24A | -6.8115460321 | 13.5587796458 | 0.3650986872  |
| H24B | -7.6995420597 | 14.2845937208 | 1.6740694057  |
| H25A | -5.6545690022 | 15.5391754918 | 1.1435140601  |
| H25B | -4.6571546678 | 14.0760679152 | 1.3269281981  |
| H26A | -3.2264203242 | 15.2725125944 | 2.6302233771  |
| H26B | -3.7605389699 | 16.1006216635 | 4.0996705586  |
| H26C | -4.2744378344 | 16.7111094767 | 2.4964887897  |
| H27A | -7.3191154165 | 15.2464871228 | 3.4060615108  |
| H27B | -6.3792779777 | 16.7102138187 | 3.2091133110  |
| H28A | -5.4463077103 | 16.3755388656 | 5.5481166916  |
| H28B | -7.1785788174 | 16.5685538960 | 5.4555245248  |
| H29A | -6.8541400095 | 14.8078027952 | 7.0143994286  |
| H29B | -7.4741719539 | 14.0519196530 | 5.5761763809  |
| H30A | -4.9832916661 | 14.4567814940 | 7.8677496910  |
| H30B | -4.0211393769 | 15.1353778430 | 6.5341463667  |
| H32A | -4.3484282668 | 11.1517399140 | 10.5527303158 |
| H32B | -3.4515341611 | 10.0313572900 | 11.5905717106 |
| H32C | -3.6491543519 | 9.6692006395  | 9.8644679275  |
| H33A | -2.7625389773 | 13.0472225941 | 11.3270333570 |
| H33B | -1.0036205307 | 12.8480617209 | 11.1639438071 |
| H33C | -1.9060453489 | 11.8813490573 | 12.3525089245 |
| H34A | -0.0367670865 | 10.6443387131 | 10.3165409718 |
| H34B | -1.1315748037 | 9.3683004026  | 9.7062493047  |
| H34C | -1.0557036049 | 9.7341632457  | 11.4385513956 |
| H36A | -6.7949640523 | 5.2534002904  | 2.5551614307  |
| H36B | -8.4240567810 | 4.9142890330  | 1.9449686279  |
| H36C | -8.2115677302 | 5.6901015279  | 3.5299646317  |
| H37A | -6.3069472479 | 6.5492407946  | 0.3644489989  |

|      |               |              |               |
|------|---------------|--------------|---------------|
| H37B | -7.3795117988 | 7.8826268232 | -0.1162360515 |
| H37C | -7.9511976528 | 6.2022758650 | -0.1904296747 |
| H38A | -9.4702284922 | 8.4103748115 | 1.2361907213  |
| H38B | -9.8126875942 | 7.5152034939 | 2.7404195888  |
| H38C | -9.9225057984 | 6.7009915922 | 1.1733369895  |

**Table S6b.** Cartesian coordinates of geometry optimized  $[\text{LCo}^{\text{II}}\text{Co}^{\text{III}}(\mu\text{-F})(\text{Cu}^{\text{I}}\text{Br}_2)]^+$  (**4**,  $M^{\text{S}} = 4$ , quartet state, THF solution).

| final geometry: |               | angstroms     |               |  |
|-----------------|---------------|---------------|---------------|--|
| atom            | x             | y             | z             |  |
| Co1             | -2.3379192217 | 11.3097729187 | 3.4087237507  |  |
| Co2             | -4.7660272983 | 13.0086862711 | 4.1742044530  |  |
| S1              | -2.5405933738 | 13.5109551581 | 4.6317574941  |  |
| S2              | -4.2956508358 | 10.9223308795 | 5.0145266153  |  |
| F1              | -4.0055834964 | 12.2731759235 | 2.5666009904  |  |
| Cu1             | -4.8448872732 | 10.0659292668 | 7.6119076470  |  |
| Br1             | -3.2827089608 | 8.2748407597  | 7.3372171775  |  |
| Br2             | -6.7507686944 | 11.3596311189 | 8.2563906311  |  |
| N1              | -0.7341336458 | 10.6046285971 | 4.6873506248  |  |
| N2              | -1.0500598685 | 11.7713720862 | 1.6891698902  |  |
| N3              | -2.5914212826 | 9.3690412023  | 2.4967114870  |  |
| N4              | -6.6740290884 | 12.4828150942 | 3.6545178693  |  |
| N5              | -5.2102871776 | 14.8581805666 | 3.1302302262  |  |
| N6              | -5.3926803265 | 13.6794688537 | 5.9694169427  |  |
| C1              | -2.3347424327 | 12.8943146819 | 6.2817443600  |  |
| C2              | -3.277792130  | 13.2463946905 | 7.2529645016  |  |
| C3              | -3.1888591436 | 12.7018442859 | 8.5315226862  |  |
| C4              | -2.1683493366 | 11.8148959212 | 8.8908593675  |  |
| C5              | -1.2169322146 | 11.5176117978 | 7.9141745199  |  |
| C6              | -1.2819267138 | 12.0381201119 | 6.6224343299  |  |
| C7              | -0.2358453317 | 11.6467653198 | 5.6249121288  |  |
| C8              | 0.3998373543  | 9.9774410567  | 3.9653263691  |  |
| C9              | 1.0143527514  | 10.8708825040 | 2.8963433144  |  |
| C10             | 0.2117277399  | 10.9880891337 | 1.6101536554  |  |
| C11             | -0.7173628272 | 13.2050391335 | 1.7404887619  |  |
| C12             | -1.8541570047 | 11.5595652061 | 0.4497924010  |  |
| C13             | -2.2959785751 | 10.1341408771 | 0.1485403637  |  |
| C14             | -3.2225540298 | 9.4867112229  | 1.1627660820  |  |
| C15             | -3.2780754801 | 8.3964469633  | 3.3923354399  |  |
| C16             | -4.7532068302 | 8.6581925309  | 3.4425550630  |  |
| C17             | -5.3047729281 | 9.7994908341  | 4.0530632810  |  |
| C18             | -6.6748789860 | 10.0418878101 | 3.9010385985  |  |
| C19             | -7.4727260170 | 9.1664304977  | 3.1628166360  |  |
| C20             | -6.9526987171 | 8.0241459790  | 2.5610598525  |  |
| C21             | -5.5863125485 | 7.7923180238  | 2.7402515332  |  |
| C22             | -7.2654607063 | 11.3223531818 | 4.3868561752  |  |
| C23             | -6.8214244994 | 12.3382220802 | 2.1823466153  |  |
| C24             | -6.7652074122 | 13.6754871540 | 1.4712079876  |  |
| C25             | -5.5144913832 | 14.5041800502 | 1.7078738983  |  |
| C26             | -4.0235064289 | 15.7365421875 | 3.0782641273  |  |
| C27             | -6.3364857011 | 15.6663204592 | 3.6814746832  |  |
| C28             | -6.3147981755 | 15.8828917041 | 5.1809203792  |  |
| C29             | -6.5511537360 | 14.6157596198 | 5.9782705950  |  |
| C30             | -4.3592082846 | 14.2180117336 | 6.9156428767  |  |
| C31             | -2.1001715231 | 11.2528150589 | 10.3072933519 |  |
| C32             | -3.4630245746 | 10.6914588718 | 10.7294378380 |  |
| C33             | -1.7013836714 | 12.3876312592 | 11.2597401703 |  |
| C34             | -1.0725643316 | 10.1281450992 | 10.4250046300 |  |
| C35             | -7.7671431043 | 7.1014501055  | 1.6607587617  |  |
| C36             | -7.6900617017 | 5.6615899531  | 2.1807969166  |  |
| C37             | -7.1842300965 | 7.1706372428  | 0.2404697328  |  |
| C38             | -9.2367924024 | 7.5121335156  | 1.5928535989  |  |
| H1              | -1.1707781428 | 9.8820007836  | 5.2715563957  |  |
| H3              | -1.6592431119 | 8.9763479102  | 2.3403730448  |  |
| H4              | -7.2583277081 | 13.2784072410 | 3.9184702694  |  |
| H6              | -5.7319598328 | 12.8184559775 | 6.4247204739  |  |
| H57             | -3.9460542139 | 12.9879987026 | 9.2636491699  |  |
| H5              | -0.3946435530 | 10.8395116611 | 8.1428851054  |  |

|      |               |               |               |
|------|---------------|---------------|---------------|
| H7A  | 0.0902747212  | 12.5144079126 | 5.0360307554  |
| H7B  | 0.6533490272  | 11.2628986623 | 6.1526446426  |
| H8A  | 0.0458089515  | 9.0369677089  | 3.5162237417  |
| H8B  | 1.1752184050  | 9.6937960317  | 4.6957291876  |
| H9A  | 1.2696778322  | 11.8578692464 | 3.3092497292  |
| H9B  | 1.9792111676  | 10.4233138731 | 2.6172583109  |
| H10A | 0.8395730624  | 11.4343374377 | 0.8170697254  |
| H10B | -0.0244462775 | 9.9723766001  | 1.2696467296  |
| H11A | -1.6454713037 | 13.7881252397 | 1.7572346847  |
| H11B | -0.1292712475 | 13.5008828001 | 0.8545406305  |
| H11C | -0.1450695715 | 13.4444763591 | 2.6428238769  |
| H12A | -1.2684004912 | 11.9392178237 | -0.4078898468 |
| H12B | -2.7427376147 | 12.1979814513 | 0.5506318347  |
| H13A | -2.8352624879 | 10.1784020224 | -0.8091532618 |
| H13B | -1.4352549398 | 9.4765165920  | -0.0472070611 |
| H14A | -4.1376012399 | 10.0830098247 | 1.2783783802  |
| H14B | -3.5214131014 | 8.4907604085  | 0.7932815988  |
| H15A | -3.1073917956 | 7.3746606435  | 3.0177755417  |
| H15B | -2.8183697802 | 8.4624986319  | 4.3889987250  |
| H19  | -8.5269839152 | 9.4200199544  | 3.0465348042  |
| H21  | -5.1247978892 | 6.9188838101  | 2.2739332196  |
| H22A | -8.3535584536 | 11.3268583691 | 4.2184586392  |
| H22B | -7.0971179857 | 11.4694772675 | 5.4626480185  |
| H23A | -6.0258994100 | 11.6716638684 | 1.8357673306  |
| H23B | -7.7884981770 | 11.8569115534 | 1.9686674082  |
| H24A | -6.8123866595 | 13.4812573151 | 0.3898352298  |
| H24B | -7.6755263412 | 14.2534434004 | 1.6911547578  |
| H25A | -5.6003052259 | 15.4467479178 | 1.1394099114  |
| H25B | -4.6373253802 | 13.9644695902 | 1.3359888938  |
| H26A | -3.1905359980 | 15.2031871677 | 2.6096051322  |
| H26B | -3.7151830643 | 16.0468629002 | 4.0803016099  |
| H26C | -4.2461543369 | 16.6328227018 | 2.4765362637  |
| H27A | -7.2887686846 | 15.1886512658 | 3.4203281298  |
| H27B | -6.3414812086 | 16.6368276001 | 3.1559296523  |
| H28A | -5.3983664575 | 16.3943129162 | 5.5082431311  |
| H28B | -7.1324765312 | 16.5791068411 | 5.4149082942  |
| H29A | -6.7756880881 | 14.8628650308 | 7.0270369408  |
| H29B | -7.4432081602 | 14.0861366505 | 5.6134024220  |
| H30A | -4.8834630994 | 14.5138546598 | 7.8373510131  |
| H30B | -3.9331880830 | 15.1264311235 | 6.4692619777  |
| H32A | -4.2513091719 | 11.4557262594 | 10.7410354239 |
| H32B | -3.3937001857 | 10.2725728773 | 11.7437504550 |
| H32C | -3.7831297595 | 9.8862872597  | 10.0498366671 |
| H33A | -2.4355769314 | 13.2052812934 | 11.2436091311 |
| H33B | -0.7223266052 | 12.8054500150 | 10.9830992461 |
| H33C | -1.6339582655 | 12.0140454845 | 12.2923798870 |
| H34A | -0.0493673513 | 10.4782006638 | 10.2261263428 |
| H34B | -1.3024213237 | 9.3047730318  | 9.7328527961  |
| H34C | -1.0864356568 | 9.7243685695  | 11.4467866037 |
| H36A | -6.6581099908 | 5.2868233775  | 2.2137529780  |
| H36B | -8.2661203580 | 4.9924469075  | 1.5250404262  |
| H36C | -8.1083026969 | 5.5881091677  | 3.1945686162  |
| H37A | -6.1388367568 | 6.8332269822  | 0.2053930458  |
| H37B | -7.2194574393 | 8.1998267104  | -0.1468832453 |
| H37C | -7.7641318249 | 6.5310314929  | -0.4413328476 |
| H38A | -9.3607302116 | 8.5187035515  | 1.1682181951  |
| H38B | -9.7134212367 | 7.4931076209  | 2.5832469150  |
| H38C | -9.7849292573 | 6.8132536523  | 0.9460336087  |

**Table S6c.** Cartesian coordinates of geometry optimized  $[\text{LCo}^{\text{II}}\text{Co}^{\text{III}}(\mu\text{-F})(\text{Cu}^{\text{I}}\text{Br}_2)]^+$  (4,  $M^{\text{S}} = 4$ , quartet state, MeCN solution).

| final geometry: angstroms |               |               |              |
|---------------------------|---------------|---------------|--------------|
| atom                      | x             | y             | z            |
| Co1                       | -2.3155708664 | 11.3209038823 | 3.4243555878 |
| Co2                       | -4.7642024649 | 13.0235229665 | 4.1987469573 |
| S1                        | -2.5340053359 | 13.5323326190 | 4.6481028610 |
| S2                        | -4.2860601318 | 10.9369123822 | 5.0613630270 |
| F1                        | -4.0029357135 | 12.2640997089 | 2.6024733877 |

|      |               |               |               |
|------|---------------|---------------|---------------|
| Cu1  | -4.9134870034 | 10.0683235138 | 7.5793294681  |
| Br1  | -3.5128982732 | 8.1348137082  | 7.4139143187  |
| Br2  | -6.7985844074 | 11.3761161296 | 8.2944818463  |
| N1   | -0.6972767979 | 10.6368582671 | 4.6960019518  |
| N2   | -1.0545716347 | 11.7877120867 | 1.6929498777  |
| N3   | -2.5712110716 | 9.3675194696  | 2.5373680404  |
| N4   | -6.6732669176 | 12.4986048142 | 3.6807413751  |
| N5   | -5.2009647998 | 14.8592895580 | 3.1389807343  |
| N6   | -5.3930646220 | 13.7068065103 | 5.9885152329  |
| C1   | -2.3291260802 | 12.9105229391 | 6.2963339325  |
| C2   | -3.2771238951 | 13.2540324291 | 7.2664827781  |
| C3   | -3.1971565325 | 12.6924577889 | 8.5385550475  |
| C4   | -2.1812181500 | 11.7970993287 | 8.8913779147  |
| C5   | -1.2213847099 | 11.5129472457 | 7.9182560248  |
| C6   | -1.2764089628 | 12.0522497321 | 6.6334214200  |
| C7   | -0.2175870053 | 11.6812451147 | 5.6406645896  |
| C8   | 0.4489843331  | 10.0355591926 | 3.9678185436  |
| C9   | 1.0349889652  | 10.9408302955 | 2.8937606151  |
| C10  | 0.2230917211  | 11.0286113971 | 1.6114232283  |
| C11  | -0.7486807768 | 13.2285223004 | 1.7259565063  |
| C12  | -1.8603958339 | 11.5467991586 | 0.4591224892  |
| C13  | -2.2805017046 | 10.1104730475 | 0.1803364634  |
| C14  | -3.2031719440 | 9.4689256767  | 1.2013428596  |
| C15  | -3.2637301777 | 8.4072220609  | 3.4425173143  |
| C16  | -4.7395923098 | 8.6719328002  | 3.4885515237  |
| C17  | -5.2939405762 | 9.8134619256  | 4.0972154250  |
| C18  | -6.6631576344 | 10.0587065593 | 3.9388027899  |
| C19  | -7.4595007598 | 9.1819284434  | 3.2001983778  |
| C20  | -6.9379782200 | 8.0375252230  | 2.6037579721  |
| C21  | -5.5715744273 | 7.8050213681  | 2.7851390795  |
| C22  | -7.2589937638 | 11.3399807889 | 4.4173679789  |
| C23  | -6.8202537268 | 12.3417786027 | 2.2090549171  |
| C24  | -6.7603233054 | 13.6727102991 | 1.4876436750  |
| C25  | -5.5059651117 | 14.4964559018 | 1.7178797352  |
| C26  | -4.0139529371 | 15.7386441158 | 3.0766209996  |
| C27  | -6.3261196013 | 15.6761607254 | 3.6827736371  |
| C28  | -6.2950770591 | 15.9128866479 | 5.1786698191  |
| C29  | -6.5419738833 | 14.6577842589 | 5.9912341153  |
| C30  | -4.3544449573 | 14.2338097092 | 6.9359200479  |
| C31  | -2.1173283304 | 11.2205292546 | 10.3024872572 |
| C32  | -3.4915189386 | 10.6925142110 | 10.7300955838 |
| C33  | -1.6826763159 | 12.3354190404 | 11.2629877464 |
| C34  | -1.1184928053 | 10.0681503197 | 10.4034321657 |
| C35  | -7.7532285210 | 7.1158652484  | 1.7031956929  |
| C36  | -7.6627667354 | 5.6727330682  | 2.2109973309  |
| C37  | -7.1804700822 | 7.1984533067  | 0.2802120317  |
| C38  | -9.2260135255 | 7.5172937503  | 1.6475145627  |
| H1   | -1.1077788859 | 9.8975806976  | 5.2767014550  |
| H3   | -1.6426666193 | 8.9625062585  | 2.3836123457  |
| H4   | -7.2688332931 | 13.2897692568 | 3.9365841760  |
| H6   | -5.7404574764 | 12.8488773702 | 6.4416420200  |
| H57  | -3.9535849234 | 12.9780828575 | 9.2720152401  |
| H5   | -0.3974953248 | 10.8351533504 | 8.1436837624  |
| H7A  | 0.0988942407  | 12.5565326528 | 5.0576577380  |
| H7B  | 0.6742597369  | 11.3078283959 | 6.1710933688  |
| H8A  | 0.1140978877  | 9.0859271516  | 3.5235921533  |
| H8B  | 1.2326410475  | 9.7735410700  | 4.6970998365  |
| H9A  | 1.2635447999  | 11.9368919498 | 3.3011607762  |
| H9B  | 2.0106919746  | 10.5183225526 | 2.6128222593  |
| H10A | 0.8350272893  | 11.4823973186 | 0.8105085675  |
| H10B | 0.0061662732  | 10.0049499195 | 1.2822165947  |
| H11A | -1.6876031154 | 13.7941383647 | 1.7443788883  |
| H11B | -0.1752624983 | 13.5248624553 | 0.8306603313  |
| H11C | -0.1709489727 | 13.4880006450 | 2.6195342791  |
| H12A | -1.2821295148 | 11.9234818826 | -0.4048106965 |
| H12B | -2.7580667681 | 12.1739836612 | 0.5521658345  |
| H13A | -2.8167677417 | 10.1305914037 | -0.7800476746 |
| H13B | -1.4102339887 | 9.4608082865  | 0.0018065550  |
| H14A | -4.1215070860 | 10.0619140566 | 1.3102038469  |
| H14B | -3.4950627185 | 8.4671128911  | 0.8425698667  |
| H15A | -3.0934520628 | 7.3813817894  | 3.0793199720  |
| H15B | -2.8035612031 | 8.4819349816  | 4.4381025989  |
| H19  | -8.5128101647 | 9.4381329315  | 3.0787636137  |

|      |               |               |               |
|------|---------------|---------------|---------------|
| H21  | -5.1079138774 | 6.9321829470  | 2.3189887835  |
| H22A | -8.3468556019 | 11.3415930885 | 4.2484179312  |
| H22B | -7.0910304023 | 11.4940230175 | 5.4916666582  |
| H23A | -6.0266152267 | 11.6698124917 | 1.8681996695  |
| H23B | -7.7898789059 | 11.8633548836 | 2.0011144077  |
| H24A | -6.8093167771 | 13.4702624042 | 0.4077011297  |
| H24B | -7.6671598480 | 14.2560220573 | 1.7067051934  |
| H25A | -5.5886753293 | 15.4367407565 | 1.1455735557  |
| H25B | -4.6301797255 | 13.9525335780 | 1.3485557031  |
| H26A | -3.1814188937 | 15.2021551267 | 2.6105991440  |
| H26B | -3.7049561809 | 16.0621430844 | 4.0743643903  |
| H26C | -4.2410677849 | 16.6266397617 | 2.4647698429  |
| H27A | -7.2809390147 | 15.1977883995 | 3.4321864656  |
| H27B | -6.3293007188 | 16.6389969242 | 3.1436346082  |
| H28A | -5.3722482859 | 16.4190788012 | 5.4965094677  |
| H28B | -7.1054387305 | 16.6194386703 | 5.4071036277  |
| H29A | -6.7586888447 | 14.9198315956 | 7.0382623699  |
| H29B | -7.4406210023 | 14.1345823626 | 5.6325911228  |
| H30A | -4.8748340377 | 14.5301917788 | 7.8598874180  |
| H30B | -3.9244360777 | 15.1423839923 | 6.4932462798  |
| H32A | -4.2534549136 | 11.4820251432 | 10.7717768925 |
| H32B | -3.4227865364 | 10.2458766890 | 11.7327262330 |
| H32C | -3.8459389153 | 9.9168460717  | 10.0329002326 |
| H33A | -2.3923781316 | 13.1747598839 | 11.2513945232 |
| H33B | -0.6916201009 | 12.7247024176 | 10.9871967579 |
| H33C | -1.6261460037 | 11.9520542524 | 12.2929815430 |
| H34A | -0.0870740279 | 10.3943506120 | 10.2074676318 |
| H34B | -1.3688692645 | 9.2602945705  | 9.6999013046  |
| H34C | -1.1415523652 | 9.6519692070  | 11.4203068600 |
| H36A | -6.6276655772 | 5.3059103220  | 2.2320026006  |
| H36B | -8.2397183330 | 5.0046124326  | 1.5548856049  |
| H36C | -8.0725684792 | 5.5894131528  | 3.2276612147  |
| H37A | -6.1325433081 | 6.8699484744  | 0.2381241455  |
| H37B | -7.2258725308 | 8.2299821609  | -0.0996612296 |
| H37C | -7.7607458120 | 6.5586048453  | -0.4012663729 |
| H38A | -9.3596986333 | 8.5247266772  | 1.2279547140  |
| H38B | -9.6947386486 | 7.4922322200  | 2.6416669328  |
| H38C | -9.7735408859 | 6.8170383886  | 1.0013884843  |

**Table S7a.** Cartesian coordinates of geometry optimized [LNi<sup>II</sup><sub>2</sub>(μ-F)]<sup>+</sup> (**2**, M<sup>S</sup> = 5, quintet state, gas phase).

| final geometry: angstroms |               |               |              |
|---------------------------|---------------|---------------|--------------|
| atom                      | x             | y             | z            |
| Ni1                       | 2.4083658414  | -0.9233790466 | 3.1299530222 |
| Ni2                       | 4.4143278581  | 0.7355864987  | 4.5498280458 |
| S3                        | 3.1368505459  | -1.1623969022 | 5.4743998154 |
| S4                        | 2.2209578856  | 1.4815858464  | 3.6786379112 |
| F5                        | 4.3804099951  | -0.4347768299 | 2.8654009943 |
| N6                        | 0.3516566846  | -1.4194975427 | 3.6639903283 |
| H7                        | -0.1030809156 | -0.5231484015 | 3.4716898009 |
| N8                        | 2.8486794526  | -2.9941673951 | 2.3865056041 |
| N9                        | 1.8290532518  | -0.5381405242 | 1.0908205196 |
| H10                       | 1.1774911024  | -1.2892855551 | 0.8609772591 |
| N11                       | 5.4002305631  | 2.3930375946  | 3.6026136735 |
| H12                       | 6.0626394780  | 2.7342465994  | 4.2997505875 |
| N13                       | 6.5001510567  | 0.0380576054  | 5.0002274619 |
| N14                       | 4.2665531185  | 1.8356025809  | 6.4259069579 |
| H15                       | 3.6564138155  | 2.6043564673  | 6.1356835244 |
| C16                       | 1.8346290511  | -0.2412836753 | 6.2498656567 |
| C17                       | 0.4895379879  | -0.5204914978 | 5.9649535682 |
| C18                       | -0.5110770639 | 0.3071969728  | 6.4606256899 |
| H19                       | -1.5462672896 | 0.0697204038  | 6.2042069509 |
| C20                       | -0.2370552490 | 1.4224472155  | 7.2583640303 |
| C21                       | 1.0979182405  | 1.6328254170  | 7.5947672133 |
| H22                       | 1.3703047749  | 2.4607526046  | 8.2503788048 |
| C23                       | 2.1243479662  | 0.8186073357  | 7.1144746086 |
| C24                       | 0.1284483128  | -1.6892507760 | 5.1066981621 |
| H25                       | 0.7325841222  | -2.5632464422 | 5.3839711114 |
| H26                       | -0.9318681637 | -1.9529824879 | 5.2643695432 |



|     |               |               |               |
|-----|---------------|---------------|---------------|
| C27 | -0.2960088689 | -2.4601262459 | 2.8455277120  |
| H28 | -0.4147960451 | -2.0764640172 | 1.8199591754  |
| H29 | -1.3180180449 | -2.6406684069 | 3.2206420083  |
| C30 | 0.4688267127  | -3.7759070718 | 2.8199537239  |
| H31 | -0.2131381462 | -4.5480446157 | 2.4369450407  |
| H32 | 0.7190663071  | -4.0951703398 | 3.8414877095  |
| C33 | 1.6936793166  | -3.7879470084 | 1.9202102940  |
| H34 | 2.0267826057  | -4.8310512104 | 1.7589076706  |
| H35 | 1.3873288346  | -3.4190027203 | 0.9322479137  |
| C36 | 3.5112784827  | -3.7255412756 | 3.4740788090  |
| H37 | 2.8482200959  | -3.8368084291 | 4.3365885077  |
| H38 | 4.3907239577  | -3.1610806259 | 3.8014718250  |
| H39 | 3.8358117451  | -4.7241588667 | 3.1305898456  |
| C40 | 3.8509316743  | -2.8594511465 | 1.2978809657  |
| H41 | 4.2038583178  | -3.8714765640 | 1.0213884122  |
| H42 | 4.6921120895  | -2.3094764408 | 1.7361689350  |
| C43 | 3.4032782192  | -2.1382328413 | 0.0354295842  |
| H44 | 4.2591871246  | -2.1660769678 | -0.6537090204 |
| H45 | 2.6079019929  | -2.6928937020 | -0.4877577135 |
| C46 | 2.9986011767  | -0.6848241085 | 0.1986183814  |
| H47 | 3.8199811511  | -0.1062986965 | 0.6377145148  |
| H48 | 2.7766320002  | -0.2576121749 | -0.7945950044 |
| C49 | 1.0923187234  | 0.7344082678  | 0.8761096024  |
| H50 | 0.3039018844  | 0.7970174525  | 1.6401782990  |
| H51 | 0.6030169381  | 0.7126486605  | -0.1115918408 |
| C52 | 2.6681795415  | 2.2498810042  | 2.1404569737  |
| C53 | 2.0201936156  | 1.9057377875  | 0.9400925114  |
| C54 | 2.3321744733  | 2.5691829323  | -0.2407501852 |
| H55 | 1.8119002933  | 2.2622655500  | -1.1507370487 |
| C56 | 3.3015789179  | 3.5706140876  | -0.3116915710 |
| C57 | 3.9532857450  | 3.8792232738  | 0.8771303686  |
| H58 | 4.7416809324  | 4.6320474924  | 0.8825944056  |
| C59 | 3.6612326181  | 3.2382682667  | 2.0820552900  |
| C60 | 4.5181097054  | 3.5410417186  | 3.2699368816  |
| H61 | 5.1370586568  | 4.4274837837  | 3.0541322702  |
| H62 | 3.9122454125  | 3.7641598164  | 4.1602718374  |
| C63 | 6.1873938282  | 1.9141817302  | 2.4466724506  |
| H64 | 6.4955295836  | 2.7666223586  | 1.8177272833  |
| H65 | 5.5309100750  | 1.2715212159  | 1.8487593434  |
| C66 | 7.4228965896  | 1.1475523566  | 2.8827708283  |
| H67 | 8.1246423418  | 1.8258244394  | 3.3939395451  |
| H68 | 7.9540256142  | 0.8353007357  | 1.9724638491  |
| C69 | 7.1839232836  | -0.1199138986 | 3.6901924377  |
| H70 | 6.5488549657  | -0.7956094590 | 3.1048480005  |
| H71 | 8.1570789686  | -0.6186692985 | 3.8616688001  |
| C72 | 6.4135757313  | -1.3035122729 | 5.5910876624  |
| H73 | 7.4223423666  | -1.7260434215 | 5.7471844702  |
| H74 | 5.8565001054  | -1.9604318816 | 4.9148644955  |
| H75 | 5.8788822473  | -1.2816419338 | 6.5449016312  |
| C76 | 7.3041868429  | 0.8945895237  | 5.8960103527  |
| H77 | 7.6277863559  | 1.7838624145  | 5.3390237687  |
| H78 | 8.2333016182  | 0.3533115943  | 6.1584594239  |
| C79 | 6.6141131920  | 1.3685754582  | 7.1645354219  |
| H80 | 7.3890015141  | 1.8305217620  | 7.7923993987  |
| H81 | 6.2334724306  | 0.5229629900  | 7.7545260483  |
| C82 | 5.5198756705  | 2.4045292533  | 6.9517073009  |
| H83 | 5.3180431845  | 2.9208011549  | 7.9059803436  |
| H84 | 5.8708993668  | 3.1830163334  | 6.2561011330  |
| C85 | 3.5368060786  | 1.1157323697  | 7.4994425634  |
| H86 | 4.0773438217  | 0.1835678410  | 7.7102675400  |
| H87 | 3.5515664922  | 1.7264170890  | 8.4190009136  |
| C88 | -1.3688526349 | 2.3423035778  | 7.7009117493  |
| C89 | -2.3902023369 | 1.5518127620  | 8.5263096314  |
| H90 | -1.9275711882 | 1.1357014070  | 9.4318348229  |
| H91 | -2.8262960871 | 0.7186333129  | 7.9595190334  |
| H92 | -3.2158754492 | 2.2069517069  | 8.8378985082  |
| C93 | -2.0478631624 | 2.9195856185  | 6.4519591517  |
| H94 | -2.8527465495 | 3.6112816876  | 6.7381445525  |
| H95 | -2.4933156396 | 2.1351750869  | 5.8255801327  |
| H96 | -1.3257281179 | 3.4717422492  | 5.8339651043  |
| C97 | -0.8655034173 | 3.5072473855  | 8.5501895942  |
| H98 | -0.3852577001 | 3.1628056989  | 9.4768618798  |
| H99 | -1.7102279826 | 4.1471752906  | 8.8378295608  |

|      |               |              |               |
|------|---------------|--------------|---------------|
| H100 | -0.1502294761 | 4.1355441420 | 8.0005193107  |
| C101 | 3.6550779023  | 4.1989046648 | -1.6546604263 |
| C102 | 4.7432989585  | 5.2614331860 | -1.5229023552 |
| H103 | 4.9602760943  | 5.6937854874 | -2.5085206937 |
| H104 | 5.6828333781  | 4.8404847283 | -1.1370435879 |
| H105 | 4.4348651070  | 6.0837530591 | -0.8624953356 |
| C106 | 4.1735863473  | 3.0990906731 | -2.5913721312 |
| H107 | 4.4552085214  | 3.5250134864 | -3.5647753209 |
| H108 | 3.4186685018  | 2.3226431039 | -2.7759797175 |
| H109 | 5.0615989668  | 2.6095864874 | -2.1661766097 |
| C110 | 2.4123811688  | 4.8543210175 | -2.2660951082 |
| H111 | 2.0314315434  | 5.6558880632 | -1.6186635243 |
| H112 | 1.5981422323  | 4.1345990070 | -2.4228838679 |
| H113 | 2.6566121636  | 5.2946163276 | -3.2430459257 |

**Table S7b.** Cartesian coordinates of geometry optimized [LNi<sup>II</sup><sub>2</sub>(μ-F)]<sup>+</sup> (**2**, M<sup>S</sup> = 5, quintet state, THF solution).

| final geometry: angstroms |               |               |               |
|---------------------------|---------------|---------------|---------------|
| atom                      | x             | y             | z             |
| Ni1                       | 2.3414236717  | -0.9360808128 | 3.0802520940  |
| Ni2                       | 4.4280350117  | 0.7729514954  | 4.5426503126  |
| S3                        | 3.1216394409  | -1.1629134864 | 5.4624207978  |
| S4                        | 2.2223857896  | 1.4461511290  | 3.6790863897  |
| F5                        | 4.3440230622  | -0.4383031907 | 2.8535429412  |
| N6                        | 0.2859242547  | -1.4175357360 | 3.6413989403  |
| H7                        | -0.1868592429 | -0.5270796507 | 3.4610513763  |
| N8                        | 2.7534076039  | -2.9945214713 | 2.3394717266  |
| N9                        | 1.7368706310  | -0.5266487745 | 1.0708277173  |
| H10                       | 1.0662996148  | -1.2543130325 | 0.8135589325  |
| N11                       | 5.3840599992  | 2.4321020688  | 3.6028379514  |
| H12                       | 6.0514996747  | 2.8087520310  | 4.2794605462  |
| N13                       | 6.4896521810  | 0.0841152030  | 4.9945739429  |
| N14                       | 4.2431366431  | 1.8753365672  | 6.4146052900  |
| H15                       | 3.6430834528  | 2.6564399551  | 6.1332441638  |
| C16                       | 1.8108264983  | -0.2374474973 | 6.2308861741  |
| C17                       | 0.4658362522  | -0.5162476953 | 5.9347694729  |
| C18                       | -0.5365324789 | 0.3350677124  | 6.3888743988  |
| H19                       | -1.5685222360 | 0.0988528731  | 6.1146007433  |
| C20                       | -0.2646319061 | 1.4748153257  | 7.1529144216  |
| C21                       | 1.0662421331  | 1.6815679626  | 7.5111947252  |
| H22                       | 1.3391984805  | 2.5291992503  | 8.1422552899  |
| C23                       | 2.0949930500  | 0.8437724627  | 7.0744614834  |
| C24                       | 0.0980452469  | -1.6934382355 | 5.0875990199  |
| H25                       | 0.7135537638  | -2.5634330420 | 5.3518417038  |
| H26                       | -0.9565093388 | -1.9663493195 | 5.2694833259  |
| C27                       | -0.3848956187 | -2.4562184753 | 2.8329415777  |
| H28                       | -0.5225025442 | -2.0673756355 | 1.8119068895  |
| H29                       | -1.3999611675 | -2.6293840086 | 3.2301168415  |
| C30                       | 0.3724483484  | -3.7753645271 | 2.7860162743  |
| H31                       | -0.3179695904 | -4.5377313100 | 2.3968727868  |
| H32                       | 0.6278978140  | -4.1120219998 | 3.8013779046  |
| C33                       | 1.5884541853  | -3.7798542985 | 1.8730265742  |
| H34                       | 1.9189993459  | -4.8211868375 | 1.6954967537  |
| H35                       | 1.2711698575  | -3.3976511132 | 0.8937841847  |
| C36                       | 3.4202621077  | -3.7366993434 | 3.4178332283  |
| H37                       | 2.7605209692  | -3.8515211835 | 4.2834478654  |
| H38                       | 4.3065597817  | -3.1792667234 | 3.7402903927  |
| H39                       | 3.7343776756  | -4.7365991251 | 3.0671845916  |
| C40                       | 3.7501046612  | -2.8559881545 | 1.2442958126  |
| H41                       | 4.0993287748  | -3.8677593161 | 0.9617559673  |
| H42                       | 4.5940554391  | -2.3085544584 | 1.6817650208  |
| C43                       | 3.2941854554  | -2.1280272598 | -0.0123104994 |
| H44                       | 4.1453042460  | -2.1551215116 | -0.7085560480 |
| H45                       | 2.4899820474  | -2.6755216067 | -0.5294164059 |
| C46                       | 2.8971518328  | -0.6730287163 | 0.1645576000  |
| H47                       | 3.7262649406  | -0.1019099253 | 0.6001500306  |
| H48                       | 2.6640321141  | -0.2393260391 | -0.8233084414 |
| C49                       | 1.0187125628  | 0.7609073800  | 0.8836615031  |
| H50                       | 0.2400779427  | 0.8240418514  | 1.6579855918  |

|      |               |               |               |
|------|---------------|---------------|---------------|
| H51  | 0.5132796242  | 0.7564065341  | -0.0961038901 |
| C52  | 2.6326697082  | 2.2488880344  | 2.1446545408  |
| C53  | 1.9611470309  | 1.9222900012  | 0.9505902014  |
| C54  | 2.2456089365  | 2.6085224012  | -0.2256744209 |
| H55  | 1.7064957057  | 2.3109870404  | -1.1288342456 |
| C56  | 3.2055048588  | 3.6202200573  | -0.2973941563 |
| C57  | 3.8775662703  | 3.9154574408  | 0.8848846124  |
| H58  | 4.6584886579  | 4.6768783446  | 0.8926857410  |
| C59  | 3.6157388421  | 3.2502246442  | 2.0851524496  |
| C60  | 4.4813679332  | 3.5640057357  | 3.2664506229  |
| H61  | 5.0886224374  | 4.4572019084  | 3.0452535532  |
| H62  | 3.8796227379  | 3.7864222514  | 4.1601258411  |
| C63  | 6.1713028189  | 1.9595403077  | 2.4432756773  |
| H64  | 6.4742680554  | 2.8152452968  | 1.8161199114  |
| H65  | 5.5174310973  | 1.3122861817  | 1.8461314426  |
| C66  | 7.4119774186  | 1.2003516975  | 2.8782054063  |
| H67  | 8.1053846364  | 1.8826583273  | 3.3949137580  |
| H68  | 7.9467139910  | 0.8927887724  | 1.9675677129  |
| C69  | 7.1747434113  | -0.0697084133 | 3.6826944955  |
| H70  | 6.5389676321  | -0.7456789624 | 3.0973623650  |
| H71  | 8.1482462855  | -0.5679409959 | 3.8544947723  |
| C72  | 6.4110106912  | -1.2599719942 | 5.5826403983  |
| H73  | 7.4232581860  | -1.6774792564 | 5.7342342792  |
| H74  | 5.8547848859  | -1.9171991705 | 4.9049870062  |
| H75  | 5.8834354457  | -1.2407028451 | 6.5415265119  |
| C76  | 7.2884251489  | 0.9464377633  | 5.8947874685  |
| H77  | 7.6028813304  | 1.8419883241  | 5.3428815312  |
| H78  | 8.2216190373  | 0.4100712201  | 6.1530284206  |
| C79  | 6.5926675485  | 1.4084136506  | 7.1661749035  |
| H80  | 7.3645674482  | 1.8725900776  | 7.7972259246  |
| H81  | 6.2167816982  | 0.5578361085  | 7.7535283976  |
| C82  | 5.4952438525  | 2.4420047873  | 6.9561193806  |
| H83  | 5.2825902800  | 2.9507222166  | 7.9121965201  |
| H84  | 5.8469385132  | 3.2268784583  | 6.2684233361  |
| C85  | 3.5029342512  | 1.1513753991  | 7.4778128811  |
| H86  | 4.0474281184  | 0.2237897724  | 7.6992116210  |
| H87  | 3.5007969875  | 1.7620200106  | 8.3981289804  |
| C88  | -1.3940547468 | 2.4300590765  | 7.5265720436  |
| C89  | -2.4575145315 | 1.6892232074  | 8.3449112688  |
| H90  | -2.0307156696 | 1.2951649528  | 9.2784274292  |
| H91  | -2.8902154910 | 0.8457134602  | 7.7898105810  |
| H92  | -3.2794414508 | 2.3717767105  | 8.6073948224  |
| C93  | -2.0266748168 | 2.9732322617  | 6.2376549463  |
| H94  | -2.8278125792 | 3.6886851605  | 6.4766504038  |
| H95  | -2.4646873516 | 2.1723052359  | 5.6265513974  |
| H96  | -1.2753781720 | 3.4896865101  | 5.6230726956  |
| C97  | -0.8973646226 | 3.6187125032  | 8.3478149513  |
| H98  | -0.4510112776 | 3.3012586905  | 9.3011994806  |
| H99  | -1.7405955146 | 4.2839479866  | 8.5816848841  |
| H100 | -0.1513668559 | 4.2104248818  | 7.7979851043  |
| C101 | 3.5219022801  | 4.2811625249  | -1.6350074841 |
| C102 | 4.5823166327  | 5.3721859600  | -1.5019188953 |
| H103 | 4.7704282132  | 5.8273045383  | -2.4845824333 |
| H104 | 5.5380543626  | 4.9706404509  | -1.1354367546 |
| H105 | 4.2608633318  | 6.1719991663  | -0.8193608774 |
| C106 | 4.0531270169  | 3.2130708240  | -2.6011996721 |
| H107 | 4.2985711544  | 3.6623637092  | -3.5752646718 |
| H108 | 3.3180252010  | 2.4150732956  | -2.7758854910 |
| H109 | 4.9648958633  | 2.7468206012  | -2.2007806918 |
| C110 | 2.2525411821  | 4.9125989779  | -2.2172490229 |
| H111 | 1.8529279753  | 5.6839349296  | -1.5433328148 |
| H112 | 1.4630371263  | 4.1671721459  | -2.3820911857 |
| H113 | 2.4715264131  | 5.3859684871  | -3.1857958414 |

**Table S8c.** Cartesian coordinates of geometry optimized [LNi<sup>II</sup><sub>2</sub>(μ-F)]<sup>+</sup> (2, M<sup>S</sup> = 5, quintet state, MeCN solution).

| final geometry: | angstroms    |              |               |
|-----------------|--------------|--------------|---------------|
| atom            | x            | y            | z             |
| Ni1             | 5.1584838319 | 2.6877754652 | 2.1686121621  |
| Ni2             | 5.2675060456 | 4.3861600594 | -0.3518599202 |

|      |               |               |               |
|------|---------------|---------------|---------------|
| S2   | 6.1870929961  | 4.9506759158  | 1.9007103988  |
| S1   | 6.3483821831  | 2.1948249794  | 0.0421958911  |
| F1   | 3.8223723119  | 3.4944577751  | 0.8228442371  |
| N1   | 6.7940684856  | 1.8367576932  | 3.3374733454  |
| N2   | 3.8994717120  | 0.8495278848  | 2.3302136294  |
| N3   | 4.1216993630  | 3.3135931206  | 3.9507779130  |
| N4   | 4.2769918614  | 6.2876446959  | -0.4882116615 |
| N5   | 4.1302544098  | 3.8991585798  | -2.2176839704 |
| N6   | 6.9993275118  | 5.1161078687  | -1.4629089068 |
| C1   | 4.9103761144  | 5.9970272660  | 2.5650809870  |
| C2   | 4.4212123142  | 7.0953501526  | 1.8400697137  |
| C3   | 3.4617234876  | 7.9408760704  | 2.4033172944  |
| C4   | 2.9380553997  | 7.7356827244  | 3.6768011782  |
| C5   | 3.4233018719  | 6.6276129896  | 4.3758129646  |
| C6   | 4.3737868783  | 5.7606559544  | 3.8458502694  |
| C7   | 4.7012358879  | 4.5132848142  | 4.6099199969  |
| C8   | 2.6776721873  | 3.4648776768  | 3.6652962708  |
| C9   | 1.9936285952  | 2.1243711373  | 3.4733630681  |
| C10  | 2.4794344829  | 1.2904866038  | 2.2979256143  |
| C11  | 4.1072940256  | 0.0483378857  | 1.1162023193  |
| C12  | 4.1374763727  | -0.0108128426 | 3.5123813053  |
| C13  | 5.5918721877  | -0.3162724989 | 3.8315169783  |
| C14  | 6.3909024184  | 0.8612326838  | 4.3739133426  |
| C15  | 7.9103861346  | 1.2796571745  | 2.5321487906  |
| C16  | 8.5812867214  | 2.2990004034  | 1.6635169395  |
| C17  | 7.9726721637  | 2.7485831594  | 0.4845529968  |
| C18  | 8.6675387510  | 3.6571327094  | -0.3318034836 |
| C19  | 9.9208935636  | 4.1180404354  | 0.0589384737  |
| C20  | 10.5387552498 | 3.7021206383  | 1.2434258171  |
| C21  | 9.8407907414  | 2.7822741855  | 2.0262939078  |
| C22  | 8.0865357907  | 4.1202484240  | -1.6323586037 |
| C23  | 6.7009838513  | 5.7596640235  | -2.7605814912 |
| C24  | 5.9327669874  | 4.8696513127  | -3.7276700195 |
| C25  | 4.4539458381  | 4.7102910365  | -3.4140437447 |
| C26  | 4.3400686542  | 2.4823519920  | -2.5451503494 |
| C27  | 2.6889575692  | 4.0383209981  | -1.8757718259 |
| C28  | 2.1942495108  | 5.4381852533  | -1.5446565882 |
| C29  | 2.8180046526  | 6.0989347917  | -0.3288344698 |
| C30  | 4.8209017924  | 7.3339856738  | 0.4150038815  |
| C31  | 1.8302549133  | 8.5935606586  | 4.2799144384  |
| C32  | 1.4685639779  | 9.7776479885  | 3.3860192107  |
| C33  | 0.5773136115  | 7.7238095163  | 4.4553715661  |
| C34  | 2.2737295839  | 9.1376178303  | 5.6426295692  |
| C35  | 11.9222872145 | 4.2331796818  | 1.6080885851  |
| C36  | 12.9239256422 | 3.8089842946  | 0.5258919467  |
| C37  | 12.4115263091 | 3.6911481045  | 2.9498182629  |
| C38  | 11.8770683657 | 5.7634896318  | 1.6924792363  |
| H1   | 7.1742409171  | 2.6569279866  | 3.8209884605  |
| H3   | 4.2085007235  | 2.5585324538  | 4.6357313613  |
| H4   | 4.4276999236  | 6.6441462086  | -1.4351328134 |
| H6   | 7.3704181814  | 5.8414507906  | -0.8411826898 |
| H3B  | 3.1064579213  | 8.7728971912  | 1.7933524441  |
| H5   | 3.0244654286  | 6.3967362335  | 5.3671968533  |
| H7A  | 4.2966176620  | 4.5948589050  | 5.6320346126  |
| H7B  | 5.7862342281  | 4.3546933309  | 4.6932581739  |
| H8A  | 2.5839175360  | 4.0733738892  | 2.7572009830  |
| H8B  | 2.1832042718  | 4.0051974395  | 4.4910725462  |
| H9A  | 2.0191786540  | 1.5529772138  | 4.4146186990  |
| H9B  | 0.9268362527  | 2.3214108753  | 3.2906907630  |
| H10A | 1.8389225076  | 0.3918036000  | 2.2108136163  |
| H10B | 2.3728683382  | 1.8792370925  | 1.3782881265  |
| H11A | 3.9029739943  | 0.6713996119  | 0.2382180519  |
| H11B | 5.1403191679  | -0.3069556608 | 1.0490477753  |
| H11C | 3.4248803178  | -0.8207857134 | 1.1040705596  |
| H12A | 3.5783221948  | -0.9557834536 | 3.3724021920  |
| H12B | 3.6966466116  | 0.4685838663  | 4.3960377115  |
| H13A | 6.1056469972  | -0.7726743733 | 2.9728699495  |
| H13B | 5.5861063316  | -1.0942880105 | 4.6088005646  |
| H14A | 5.8044277207  | 1.3912548088  | 5.1398491654  |
| H14B | 7.2921846142  | 0.4851420110  | 4.8874871359  |
| H15A | 7.5037333719  | 0.4696581220  | 1.9110935099  |
| H15B | 8.6539398222  | 0.8284629954  | 3.2121386903  |
| H19  | 10.4315265621 | 4.8236043009  | -0.6020094512 |

|      |               |               |               |
|------|---------------|---------------|---------------|
| H21  | 10.2774698264 | 2.4036403512  | 2.9519465515  |
| H22A | 8.8845130534  | 4.5600841396  | -2.2559255693 |
| H22B | 7.6750897608  | 3.2642711358  | -2.1851914724 |
| H23A | 7.6461303274  | 6.0789879595  | -3.2321607531 |
| H23B | 6.1313360852  | 6.6812809271  | -2.5664707386 |
| H24A | 5.9944189439  | 5.3375238758  | -4.7211065826 |
| H24B | 6.4301129344  | 3.8949266811  | -3.8393853705 |
| H25A | 4.0303074747  | 5.7152460545  | -3.2903078274 |
| H25B | 3.9314488071  | 4.2696266422  | -4.2847127769 |
| H26A | 4.0624906531  | 1.8668774741  | -1.6823085264 |
| H26B | 3.7148538127  | 2.1870113993  | -3.4073581477 |
| H26C | 5.3902775213  | 2.2816652878  | -2.7793520116 |
| H27A | 2.5281585645  | 3.3897214336  | -1.0053235121 |
| H27B | 2.0914200168  | 3.6417992564  | -2.7191381333 |
| H28A | 1.1151470630  | 5.3458154152  | -1.3514839543 |
| H28B | 2.2690920661  | 6.1091776810  | -2.4149044969 |
| H29A | 2.3278251126  | 7.0728261982  | -0.1604851284 |
| H29B | 2.6646199693  | 5.4778685263  | 0.5620842886  |
| H30A | 4.4450546483  | 8.3188389383  | 0.0923650641  |
| H30B | 5.9142072260  | 7.3401735421  | 0.2932284565  |
| H32A | 1.0867720375  | 9.4517013323  | 2.4076127431  |
| H32B | 0.6811159987  | 10.3758973085 | 3.8657257141  |
| H32C | 2.3329343812  | 10.4355098545 | 3.2152307348  |
| H33A | 0.7604130964  | 6.8706831698  | 5.1238233551  |
| H33B | -0.2455060329 | 8.3167918962  | 4.8824321584  |
| H33C | 0.2439882910  | 7.3241293629  | 3.4861431977  |
| H34A | 2.5071614980  | 8.3320052728  | 6.3519988837  |
| H34B | 3.1695652142  | 9.7672881837  | 5.5400794421  |
| H34C | 1.4752011388  | 9.7510094601  | 6.0857554207  |
| H36A | 12.6535998097 | 4.2079334312  | -0.4615921676 |
| H36B | 13.9319110878 | 4.1758279048  | 0.7710561277  |
| H36C | 12.9709975869 | 2.7128990961  | 0.4450268166  |
| H37A | 12.5042401158 | 2.5956748403  | 2.9366819296  |
| H37B | 13.4038073487 | 4.1060141502  | 3.1766139139  |
| H37C | 11.7374454282 | 3.9687007785  | 3.7735464931  |
| H38A | 11.5815865011 | 6.2192423262  | 0.7374900357  |
| H38B | 11.1584882255 | 6.0903140106  | 2.4581323831  |
| H38C | 12.8674972421 | 6.1603197668  | 1.9605578411  |

**Table S8a.** Cartesian coordinates of geometry optimized [LNi<sup>II</sup><sub>2</sub>( $\mu$ -F)(Cu<sup>I</sup>Br<sub>2</sub>)] (**5**, M<sup>S</sup> = 5, quintet state) gas phase.

final geometry: angstroms

| atom | x             | y             | z            |
|------|---------------|---------------|--------------|
| Br1  | -1.5476477594 | 1.8080761388  | 3.2689418726 |
| Br2  | 1.5999938122  | 4.4882580597  | 5.6898553843 |
| Ni3  | 2.3278558000  | -0.8566977410 | 2.9679000903 |
| Ni4  | 4.3916289634  | 0.8377727284  | 4.3854443969 |
| Cu5  | 0.1206061150  | 3.0438939355  | 4.4767828426 |
| S6   | 3.1066897398  | -1.0830648826 | 5.2860041397 |
| S7   | 2.2185604896  | 1.5028093411  | 3.4525758959 |
| F8   | 4.3758104676  | -0.4396385507 | 2.7338537550 |
| N9   | 0.2896286418  | -1.2519549838 | 3.5370759445 |
| H10  | -0.1576318960 | -0.3311143312 | 3.3969420824 |
| N11  | 2.6833198208  | -2.9845447341 | 2.2906567279 |
| N12  | 1.8319459207  | -0.5186261155 | 0.9094554477 |
| H13  | 1.1532327283  | -1.2467323446 | 0.6861779089 |
| N14  | 5.3816831734  | 2.4775583414  | 3.4646100977 |
| H15  | 6.0156288924  | 2.8297710679  | 4.1807572766 |
| N16  | 6.4897914633  | 0.2244389038  | 4.9638648110 |
| N17  | 4.1583328793  | 1.9360849348  | 6.2574907602 |
| H18  | 3.4605872049  | 2.6565298906  | 6.0097674722 |
| C19  | 1.8143071776  | -0.2134243683 | 6.1505179935 |
| C20  | 0.4615707350  | -0.4907457585 | 5.9028169678 |
| C21  | -0.5282550512 | 0.2533424280  | 6.5402550103 |
| H22  | -1.5687180088 | 0.0324480203  | 6.2936657499 |
| C23  | -0.2366587734 | 1.2788479057  | 7.4443320652 |
| C24  | 1.1113825454  | 1.5127464331  | 7.6983410554 |
| H25  | 1.4066352750  | 2.3096051628  | 8.3801288413 |
| C26  | 2.1256531195  | 0.7927773260  | 7.0704413385 |
| C27  | 0.0693049169  | -1.5880013686 | 4.9649323496 |

|      |               |               |               |
|------|---------------|---------------|---------------|
| H28  | 0.6441089148  | -2.4964590444 | 5.1959447951  |
| H29  | -0.9998773965 | -1.8246000338 | 5.1104435981  |
| C30  | -0.4168498420 | -2.2205109437 | 2.6873294181  |
| H31  | -0.4961012401 | -1.7999075353 | 1.6720687605  |
| H32  | -1.4570003589 | -2.3294374683 | 3.0426544119  |
| C33  | 0.2399951071  | -3.5958458081 | 2.6409643103  |
| H34  | -0.4885116927 | -4.2974359548 | 2.2085170492  |
| H35  | 0.4244715670  | -3.9655023846 | 3.6598115664  |
| C36  | 1.4952986586  | -3.6979031995 | 1.7867152354  |
| H37  | 1.7589605085  | -4.7650357186 | 1.6410821159  |
| H38  | 1.2512598337  | -3.3142183723 | 0.7873228459  |
| C39  | 3.2482957438  | -3.7360912590 | 3.4152516181  |
| H40  | 2.5482923709  | -3.7767951998 | 4.2546657977  |
| H41  | 4.1542100859  | -3.2317340357 | 3.7685234052  |
| H42  | 3.5081990802  | -4.7657048310 | 3.1033795899  |
| C43  | 3.7395583525  | -2.9169821653 | 1.2525309736  |
| H44  | 4.0697523313  | -3.9488656204 | 1.0167315795  |
| H45  | 4.5750044893  | -2.3813293785 | 1.7205548494  |
| C46  | 3.3811555090  | -2.2117358060 | -0.0472740209 |
| H47  | 4.2705809889  | -2.2859171283 | -0.6901538753 |
| H48  | 2.5935856118  | -2.7535911478 | -0.5956810940 |
| C49  | 3.0206365823  | -0.7402574736 | 0.0627654431  |
| H50  | 3.8502362682  | -0.1830563669 | 0.5143199415  |
| H51  | 2.8502702071  | -0.3351104887 | -0.9507809054 |
| C52  | 1.1470875408  | 0.7723771311  | 0.6256632886  |
| H53  | 0.3207389348  | 0.8887201227  | 1.3434509988  |
| H54  | 0.7137182295  | 0.7340672753  | -0.3881493377 |
| C55  | 2.6947720634  | 2.2845519025  | 1.9261289206  |
| C56  | 2.1056798783  | 1.9185187992  | 0.7020955181  |
| C57  | 2.5045709699  | 2.5365706004  | -0.4793379316 |
| H58  | 2.0397987445  | 2.1991846201  | -1.4089157477 |
| C59  | 3.4931613810  | 3.5215436961  | -0.5236372104 |
| C60  | 4.0477997022  | 3.8862605656  | 0.6974793262  |
| H61  | 4.8315060195  | 4.6433892382  | 0.7353147674  |
| C62  | 3.6793190312  | 3.2839482364  | 1.9009802237  |
| C63  | 4.4813605811  | 3.6114963214  | 3.1186040181  |
| H64  | 5.0902283075  | 4.5095922087  | 2.9201359835  |
| H65  | 3.8402961755  | 3.8233252813  | 3.9873535881  |
| C66  | 6.2025519178  | 1.9939140347  | 2.3383297210  |
| H67  | 6.5198284790  | 2.8375275669  | 1.7005131069  |
| H68  | 5.5698892036  | 1.3329852517  | 1.7325952032  |
| C69  | 7.4366434849  | 1.2456311840  | 2.8163758062  |
| H70  | 8.1327021888  | 1.9438818287  | 3.3087144489  |
| H71  | 7.9771882439  | 0.8968446474  | 1.9243896792  |
| C72  | 7.1910890671  | 0.0113305215  | 3.6744693888  |
| H73  | 6.5604255812  | -0.6871296879 | 3.1095330279  |
| H74  | 8.1654321117  | -0.4773712591 | 3.8770580347  |
| C75  | 6.4111256654  | -1.0797991152 | 5.6278163932  |
| H76  | 7.4245063553  | -1.4729275464 | 5.8356521149  |
| H77  | 5.8793402553  | -1.7856879189 | 4.9809507963  |
| H78  | 5.8523586231  | -1.0094822422 | 6.5658427019  |
| C79  | 7.2499646717  | 1.1510361955  | 5.8261137746  |
| H80  | 7.5692415199  | 2.0120188305  | 5.2245136387  |
| H81  | 8.1855551644  | 0.6489755968  | 6.1450261838  |
| C82  | 6.5225809330  | 1.6918070053  | 7.0487203222  |
| H83  | 7.2669881041  | 2.2597247189  | 7.6263380799  |
| H84  | 6.2025746939  | 0.8776897283  | 7.7144395599  |
| C85  | 5.3545036339  | 2.6271981800  | 6.7592859937  |
| H86  | 5.0999240179  | 3.1788121731  | 7.6816642391  |
| H87  | 5.6513367504  | 3.3981526540  | 6.0308258030  |
| C88  | 3.5456232764  | 1.1485265503  | 7.3566745361  |
| H89  | 4.1430491213  | 0.2386435211  | 7.5069194999  |
| H90  | 3.5950772216  | 1.7385553883  | 8.2893018070  |
| C91  | -1.3567454597 | 2.0884557946  | 8.0924092239  |
| C92  | -2.2490604952 | 1.1478219651  | 8.9107576159  |
| H93  | -1.6722883308 | 0.6418308285  | 9.6985099256  |
| H94  | -2.7139768148 | 0.3747197094  | 8.2839488473  |
| H95  | -3.0586902806 | 1.7154997774  | 9.3925455099  |
| C96  | -2.1968106220 | 2.7766601957  | 7.0105200376  |
| H97  | -3.0181193480 | 3.3411834981  | 7.4766639121  |
| H98  | -2.6352051985 | 2.0672467394  | 6.2966650040  |
| H99  | -1.5850459641 | 3.4854151368  | 6.4311397097  |
| C100 | -0.8143182297 | 3.1719017555  | 9.0234837231  |

|      |               |              |               |
|------|---------------|--------------|---------------|
| H101 | -0.2351108170 | 2.7467717843 | 9.8564320748  |
| H102 | -1.6527552033 | 3.7332365006 | 9.4587560263  |
| H103 | -0.1796181062 | 3.8880220446 | 8.4820611113  |
| C104 | 4.0001704615  | 4.0510744438 | -1.8604863987 |
| C105 | 5.0445834839  | 5.1518343894 | -1.6887225635 |
| H106 | 5.3678712870  | 5.5120162101 | -2.6750061156 |
| H107 | 5.9401213468  | 4.7893778580 | -1.1637467563 |
| H108 | 4.6443764720  | 6.0114856026 | -1.1337144574 |
| C109 | 4.6596768172  | 2.8896861082 | -2.6178004529 |
| H110 | 5.0585401032  | 3.2328501050 | -3.5839505715 |
| H111 | 3.9493051038  | 2.0755247052 | -2.8176222894 |
| H112 | 5.4928899192  | 2.4697595546 | -2.0350575720 |
| C113 | 2.8433659506  | 4.6137166649 | -2.6903643896 |
| H114 | 2.3606069377  | 5.4533683197 | -2.1724073197 |
| H115 | 2.0737157584  | 3.8575701165 | -2.8911299318 |
| H116 | 3.2119648566  | 4.9770454478 | -3.6608366376 |

**Table S8b.** Cartesian coordinates of geometry optimized [LNi<sup>II</sup><sub>2</sub>( $\mu$ -F)(Cu<sup>I</sup>Br<sub>2</sub>)] (**5**, M<sup>S</sup> = 5, quintet state, THF solution).

| final geometry: angstroms |               |               |               |
|---------------------------|---------------|---------------|---------------|
| atom                      | x             | y             | z             |
| Br1                       | -1.5731075590 | 2.0105299292  | 3.2252356454  |
| Br2                       | 1.4918847665  | 4.6457917455  | 5.6627626538  |
| Ni3                       | 2.3539057609  | -0.9526493207 | 3.0648093098  |
| Ni4                       | 4.4388982175  | 0.7943157335  | 4.5523854607  |
| Cu5                       | 0.5299719593  | 2.7837442325  | 4.3270540004  |
| S6                        | 3.0845217561  | -1.1119412430 | 5.4315969422  |
| S7                        | 2.3098480314  | 1.4461603719  | 3.5327849665  |
| F8                        | 4.3879423184  | -0.4795333998 | 2.8904618437  |
| N9                        | 0.2838933716  | -1.2894629472 | 3.6117711222  |
| H10                       | -0.1424956967 | -0.3677087487 | 3.4468686681  |
| N11                       | 2.6749603271  | -3.0489981733 | 2.4107039142  |
| N12                       | 1.8603434613  | -0.6007232106 | 0.9997399356  |
| H13                       | 1.1795382055  | -1.3172503031 | 0.7401444064  |
| N14                       | 5.4263721580  | 2.4416406842  | 3.5764847332  |
| H15                       | 6.0708584645  | 2.8398620111  | 4.2623227260  |
| N16                       | 6.4904145194  | 0.1590608961  | 5.1000645553  |
| N17                       | 4.1699550536  | 1.9083105114  | 6.3955865451  |
| H18                       | 3.5034501317  | 2.6417925770  | 6.1195947802  |
| C19                       | 1.7857323051  | -0.2120375760 | 6.2431800209  |
| C20                       | 0.4344958044  | -0.4831038273 | 5.9673650537  |
| C21                       | -0.5608065235 | 0.2787896931  | 6.5756345156  |
| H22                       | -1.5991364497 | 0.0552007681  | 6.3192464347  |
| C23                       | -0.2766606977 | 1.3087178797  | 7.4788636728  |
| C24                       | 1.0686455785  | 1.5399684838  | 7.7556310577  |
| H25                       | 1.3575164722  | 2.3346226975  | 8.4436974996  |
| C26                       | 2.0914667572  | 0.8030863984  | 7.1580666372  |
| C27                       | 0.0458692061  | -1.5974865947 | 5.0443902082  |
| H28                       | 0.6115338643  | -2.5059033176 | 5.2957609268  |
| H29                       | -1.0245554843 | -1.8298090097 | 5.1857260870  |
| C30                       | -0.4287218351 | -2.2674368290 | 2.7655499043  |
| H31                       | -0.4968449263 | -1.8594557893 | 1.7450911467  |
| H32                       | -1.4700939039 | -2.3652454997 | 3.1193559105  |
| C33                       | 0.2199562140  | -3.6458226514 | 2.7367408927  |
| H34                       | -0.5091392668 | -4.3426043394 | 2.2973641269  |
| H35                       | 0.3879670915  | -4.0158195110 | 3.7587947829  |
| C36                       | 1.4813269309  | -3.7555480315 | 1.8931743659  |
| H37                       | 1.7421263373  | -4.8223500231 | 1.7511080275  |
| H38                       | 1.2473720113  | -3.3727700763 | 0.8913765057  |
| C39                       | 3.2232306231  | -3.8130179130 | 3.5392709422  |
| H40                       | 2.5114347520  | -3.8563539818 | 4.3696148720  |
| H41                       | 4.1330296882  | -3.3206238089 | 3.9006534900  |
| H42                       | 3.4749746767  | -4.8426288100 | 3.2243696530  |
| C43                       | 3.7437447610  | -3.0007959308 | 1.3771681212  |
| H44                       | 4.0569582210  | -4.0387756379 | 1.1517327173  |
| H45                       | 4.5860934700  | -2.4806264129 | 1.8509245077  |
| C46                       | 3.4095134059  | -2.2996486177 | 0.0678532165  |
| H47                       | 4.3060498222  | -2.3872941842 | -0.5637326984 |
| H48                       | 2.6216579735  | -2.8347490074 | -0.4857898884 |

|      |               |               |               |
|------|---------------|---------------|---------------|
| C49  | 3.0606138829  | -0.8245210249 | 0.1669534502  |
| H50  | 3.8863286438  | -0.2687572083 | 0.6283716887  |
| H51  | 2.8999258722  | -0.4225353597 | -0.8486942718 |
| C52  | 1.1850410587  | 0.6930603579  | 0.7192414436  |
| H53  | 0.3648658239  | 0.8123402560  | 1.4428218313  |
| H54  | 0.7394998605  | 0.6545278929  | -0.2889173205 |
| C55  | 2.7537570999  | 2.2257168280  | 1.9911185068  |
| C56  | 2.1372462467  | 1.8479577913  | 0.7854227402  |
| C57  | 2.4798666327  | 2.4964075339  | -0.3974929899 |
| H58  | 1.9859722299  | 2.1682203295  | -1.3155248213 |
| C59  | 3.4383290697  | 3.5112849790  | -0.4539361813 |
| C60  | 4.0499577241  | 3.8531333262  | 0.7490676434  |
| H61  | 4.8254883300  | 4.6192422739  | 0.7698228586  |
| C62  | 3.7343486709  | 3.2254550896  | 1.9568269411  |
| C63  | 4.5407794915  | 3.5674382693  | 3.1724505934  |
| H64  | 5.1613891135  | 4.4528507615  | 2.9557992569  |
| H65  | 3.8929599994  | 3.8129353703  | 4.0275594777  |
| C66  | 6.2482470213  | 1.9225976899  | 2.4625667626  |
| H67  | 6.5746817741  | 2.7523832498  | 1.8123031636  |
| H68  | 5.6102987170  | 1.2547986125  | 1.8703144110  |
| C69  | 7.4730392138  | 1.1748238202  | 2.9603974890  |
| H70  | 8.1613341666  | 1.8739657549  | 3.4611893794  |
| H71  | 8.0256935419  | 0.8217954956  | 2.0770355345  |
| C72  | 7.2089142355  | -0.0564408826 | 3.8154929515  |
| H73  | 6.5860558164  | -0.7563324096 | 3.2441104613  |
| H74  | 8.1762303768  | -0.5484721810 | 4.0356279221  |
| C75  | 6.4031711940  | -1.1529403203 | 5.7549806650  |
| H76  | 7.4134026426  | -1.5541565004 | 5.9567940929  |
| H77  | 5.8688882510  | -1.8482975082 | 5.0979008642  |
| H78  | 5.8502361359  | -1.0872458112 | 6.6973421930  |
| C79  | 7.2565143803  | 1.0795519757  | 5.9712441927  |
| H80  | 7.5770048958  | 1.9455584320  | 5.3781466340  |
| H81  | 8.1886058714  | 0.5690555247  | 6.2824209811  |
| C82  | 6.5287006914  | 1.6061336682  | 7.1981400621  |
| H83  | 7.2762486187  | 2.1507337321  | 7.7937378907  |
| H84  | 6.1891893676  | 0.7863970872  | 7.8479631430  |
| C85  | 5.3844202908  | 2.5698544318  | 6.9120184537  |
| H86  | 5.1355621129  | 3.1185567472  | 7.8372185535  |
| H87  | 5.7026401051  | 3.3339377318  | 6.1859161501  |
| C88  | 3.5107627619  | 1.1435433657  | 7.4849312801  |
| H89  | 4.0938077680  | 0.2300753232  | 7.6650943726  |
| H90  | 3.5408223971  | 1.7413872621  | 8.4128110852  |
| C91  | -1.4059630064 | 2.1289653339  | 8.0954410327  |
| C92  | -2.3575559154 | 1.1999381008  | 8.8586499288  |
| H93  | -1.8298072336 | 0.6737444663  | 9.6676970979  |
| H94  | -2.8083740983 | 0.4436250424  | 8.2016159693  |
| H95  | -3.1768990806 | 1.7809973230  | 9.3078267330  |
| C96  | -2.1773798084 | 2.8480331953  | 6.9818758280  |
| H97  | -2.9829918214 | 3.4600825134  | 7.4160034840  |
| H98  | -2.6276561665 | 2.1456146435  | 6.2675515891  |
| H99  | -1.5076377442 | 3.5075119334  | 6.4090347587  |
| C100 | -0.8841763719 | 3.1855631201  | 9.0682256098  |
| H101 | -0.3286124472 | 2.7344298766  | 9.9036767635  |
| H102 | -1.7305532556 | 3.7428417742  | 9.4944562975  |
| H103 | -0.2275208529 | 3.9087353028  | 8.5631621261  |
| C104 | 3.8122388530  | 4.1344674772  | -1.7951922651 |
| C105 | 4.8628883491  | 5.2332830736  | -1.6485360931 |
| H106 | 5.0919497562  | 5.6588556966  | -2.6356997700 |
| H107 | 5.8035450400  | 4.8472170916  | -1.2297762236 |
| H108 | 4.5100700825  | 6.0524266925  | -1.0057412974 |
| C109 | 4.3901201157  | 3.0444392705  | -2.7086679859 |
| H110 | 4.6751470874  | 3.4726061510  | -3.6815343526 |
| H111 | 3.6676653592  | 2.2382409150  | -2.8970489668 |
| H112 | 5.2869004140  | 2.5936702827  | -2.2589543456 |
| C113 | 2.5670343416  | 4.7432795903  | -2.4497856052 |
| H114 | 2.1385202311  | 5.5331410187  | -1.8165907318 |
| H115 | 1.7851724233  | 3.9925098332  | -2.6270960605 |
| H116 | 2.8278773792  | 5.1890820807  | -3.4211967295 |



**Table S8c.** Cartesian coordinates of geometry optimized [LNi<sup>II</sup><sub>2</sub>( $\mu$ -F)(Cu<sup>I</sup>Br<sub>2</sub>)] (**5**, M<sup>S</sup> = 5, quintet state, MeCN solution).

| final geometry: angstroms |               |               |               |
|---------------------------|---------------|---------------|---------------|
| atom                      | x             | y             | z             |
| Br1                       | -1.6277497992 | 2.6322302406  | 3.2252758381  |
| Br2                       | 1.6161808098  | 4.8521704767  | 5.4513914205  |
| Ni3                       | 2.2311743746  | -1.1607135142 | 3.1432772765  |
| Ni4                       | 4.4195308076  | 0.7649731285  | 4.3323634669  |
| Cu5                       | 0.6022642433  | 2.8870438577  | 4.3054751249  |
| S6                        | 3.2090191394  | -1.1363346671 | 5.4479663274  |
| S7                        | 2.1232455772  | 1.2757416643  | 3.5202341651  |
| F8                        | 4.2075763384  | -0.5898080011 | 2.7510970352  |
| N9                        | 0.2468015345  | -1.5488736919 | 3.9226062162  |
| H10                       | -0.2314298263 | -0.6677586663 | 3.7094990004  |
| N11                       | 2.6092805633  | -3.2520138430 | 2.5872291111  |
| N12                       | 1.4902680439  | -0.9307702667 | 1.1493062579  |
| H13                       | 0.8054118007  | -1.6730766495 | 0.9847994792  |
| N14                       | 5.2433683265  | 2.3667633842  | 3.1742355050  |
| H15                       | 5.9388674446  | 2.8370273758  | 3.7581743304  |
| N16                       | 6.5269369683  | 0.2268682771  | 4.7121870583  |
| N17                       | 4.3013375867  | 2.0078161266  | 6.0971765044  |
| H18                       | 3.5992377442  | 2.7107956983  | 5.8347758135  |
| C19                       | 1.9642082011  | -0.1901013084 | 6.2960315410  |
| C20                       | 0.5998336596  | -0.5035651141 | 6.1595079140  |
| C21                       | -0.3611219697 | 0.3090734816  | 6.7571612995  |
| H22                       | -1.4119341500 | 0.0428112526  | 6.6156459188  |
| C23                       | -0.0270647728 | 1.4336962067  | 7.5213866280  |
| C24                       | 1.3315777095  | 1.7023386840  | 7.6718824849  |
| H25                       | 1.6589140630  | 2.5623456185  | 8.2568835517  |
| C26                       | 2.3199590605  | 0.9139752366  | 7.0813313083  |
| C27                       | 0.1636394096  | -1.7170278621 | 5.3963236908  |
| H28                       | 0.7869890093  | -2.5790407765 | 5.6721583324  |
| H29                       | -0.8765854221 | -1.9668875853 | 5.6689875107  |
| C30                       | -0.4846543386 | -2.6433379945 | 3.2479435691  |
| H31                       | -0.6923060139 | -2.3362254853 | 2.2115527551  |
| H32                       | -1.4685498863 | -2.7754790466 | 3.7299840169  |
| C33                       | 0.2606642960  | -3.9714022457 | 3.2560415833  |
| H34                       | -0.4596960937 | -4.7531875343 | 2.9736120446  |
| H35                       | 0.5801089822  | -4.2307796867 | 4.2761064883  |
| C36                       | 1.4140048761  | -4.0686292336 | 2.2694882363  |
| H37                       | 1.7315337626  | -5.1240690573 | 2.1687761847  |
| H38                       | 1.0351172046  | -3.7759085905 | 1.2817618586  |
| C39                       | 3.3462925583  | -3.9032511201 | 3.6803191316  |
| H40                       | 2.7417307396  | -3.9491000033 | 4.5916290841  |
| H41                       | 4.2509493018  | -3.3243406758 | 3.8987394921  |
| H42                       | 3.6399665602  | -4.9282490959 | 3.3898946733  |
| C43                       | 3.5371181576  | -3.2173133629 | 1.4230410468  |
| H44                       | 3.8777270486  | -4.2511043876 | 1.2219660683  |
| H45                       | 4.4017493030  | -2.6277403450 | 1.7535821844  |
| C46                       | 2.9995581524  | -2.6197483326 | 0.1313701879  |
| H47                       | 3.8098832740  | -2.7093717968 | -0.6074817164 |
| H48                       | 2.1735400374  | -3.2210682530 | -0.2798686594 |
| C49                       | 2.5958219893  | -1.1574918188 | 0.1913258553  |
| H50                       | 3.4432488617  | -0.5416181685 | 0.5171105605  |
| H51                       | 2.2962380311  | -0.8243786585 | -0.8173906107 |
| C52                       | 0.7530273241  | 0.3358192511  | 0.8897607173  |
| H53                       | 0.0235591215  | 0.4812339985  | 1.7003157872  |
| H54                       | 0.1904335523  | 0.2354998507  | -0.0529288470 |
| C55                       | 2.4069165879  | 1.9697037475  | 1.8967771405  |
| C56                       | 1.6796398509  | 1.5087401620  | 0.7857451262  |
| C57                       | 1.8949103186  | 2.0772060637  | -0.4660706419 |
| H58                       | 1.3235640050  | 1.6784447758  | -1.3082309619 |
| C59                       | 2.8296654525  | 3.0925269252  | -0.6825084672 |
| C60                       | 3.5437234717  | 3.5272081482  | 0.4298032746  |
| H61                       | 4.3045025919  | 4.3011613251  | 0.3230973889  |
| C62                       | 3.3575007399  | 2.9811397892  | 1.7020856867  |
| C63                       | 4.2721102643  | 3.4285649714  | 2.8008884615  |
| H64                       | 4.8278566238  | 4.3207743860  | 2.4681723143  |
| H65                       | 3.7076835416  | 3.7042370725  | 3.7041156903  |
| C66                       | 5.9703061909  | 1.8093532259  | 2.0124943800  |
| H67                       | 6.2033665620  | 2.6113907188  | 1.2915322644  |

|      |               |               |               |
|------|---------------|---------------|---------------|
| H68  | 5.3012150458  | 1.0902550195  | 1.5235731636  |
| C69  | 7.2629336605  | 1.1289946972  | 2.4283947897  |
| H70  | 7.9711433721  | 1.8770867307  | 2.8178031480  |
| H71  | 7.7384648943  | 0.7377374513  | 1.5166415040  |
| C72  | 7.1232305799  | -0.0529073533 | 3.3773393443  |
| H73  | 6.4707995109  | -0.8050934135 | 2.9149814916  |
| H74  | 8.1221134341  | -0.5051550931 | 3.5303643696  |
| C75  | 6.5532838292  | -1.0400309305 | 5.4562092248  |
| H76  | 7.5926519247  | -1.3947488077 | 5.5817636148  |
| H77  | 5.9851082264  | -1.7962218457 | 4.9028347207  |
| H78  | 6.0937250958  | -0.9255057671 | 6.4432441570  |
| C79  | 7.3477326056  | 1.2224957974  | 5.4429016672  |
| H80  | 7.5792579768  | 2.0573102830  | 4.7693497591  |
| H81  | 8.3214952198  | 0.7565570450  | 5.6877895508  |
| C82  | 6.7290402037  | 1.8073981603  | 6.7026719480  |
| H83  | 7.5147749693  | 2.4059541876  | 7.1869391307  |
| H84  | 6.4767979139  | 1.0240983486  | 7.4327639644  |
| C85  | 5.5385035030  | 2.7263984118  | 6.4681475259  |
| H86  | 5.3536610496  | 3.3206382079  | 7.3799909684  |
| H87  | 5.7710802375  | 3.4544195091  | 5.6755531194  |
| C88  | 3.7514802936  | 1.2996863606  | 7.2794922669  |
| H89  | 4.3702065650  | 0.4117201568  | 7.4665044246  |
| H90  | 3.8384723363  | 1.9526592228  | 8.1657973439  |
| C91  | -1.1175248338 | 2.2959405752  | 8.1512883223  |
| C92  | -1.9570685713 | 1.4420148858  | 9.1090369579  |
| H93  | -1.3340811948 | 1.0316411371  | 9.9174660838  |
| H94  | -2.4384250815 | 0.6000762122  | 8.5925226470  |
| H95  | -2.7509335736 | 2.0518397358  | 9.5663652788  |
| C96  | -2.0163767439 | 2.8631901337  | 7.0478088546  |
| H97  | -2.7893213964 | 3.5133029349  | 7.4855318890  |
| H98  | -2.5218332701 | 2.0729854871  | 6.4766284049  |
| H99  | -1.4255642987 | 3.4536112329  | 6.3309247402  |
| C100 | -0.5388468902 | 3.4707124636  | 8.9382706717  |
| H101 | 0.1021729441  | 3.1343281143  | 9.7665424639  |
| H102 | -1.3587185358 | 4.0612644193  | 9.3719598082  |
| H103 | 0.0500884355  | 4.1370768774  | 8.2908091147  |
| C104 | 3.0910801041  | 3.6053617503  | -2.0953152990 |
| C105 | 4.0880267693  | 4.7626964285  | -2.1160829306 |
| H106 | 4.2273122230  | 5.1100640975  | -3.1495805049 |
| H107 | 5.0746418921  | 4.4627275188  | -1.7343923565 |
| H108 | 3.7344353384  | 5.6163385441  | -1.5199628547 |
| C109 | 3.6759605471  | 2.4574230781  | -2.9304830875 |
| H110 | 3.8848447974  | 2.7968187572  | -3.9563630837 |
| H111 | 2.9872458034  | 1.6030063673  | -2.9908695643 |
| H112 | 4.6185914780  | 2.0981937019  | -2.4916511414 |
| C113 | 1.7830710169  | 4.0871846717  | -2.7318817983 |
| H114 | 1.3439587412  | 4.9092552027  | -2.1486583276 |
| H115 | 1.0361941653  | 3.2848211796  | -2.7999063038 |
| H116 | 1.9701706173  | 4.4544066481  | -3.7519193558 |

**Table S9a.** Cartesian coordinates of geometry optimized [LNi<sup>II</sup><sub>2</sub>( $\mu$ -F)(Cu<sup>I</sup>I<sub>2</sub>)] (**6**, M<sup>S</sup> = 5, quintet state) gas phase.

| final geometry: angstroms |               |               |              |  |
|---------------------------|---------------|---------------|--------------|--|
| atom                      | x             | y             | z            |  |
| I1                        | -1.7659573141 | 1.8161891965  | 3.1129588840 |  |
| I2                        | 1.4782744373  | 4.8094186311  | 5.5384917715 |  |
| Ni3                       | 2.4125114411  | -0.8489059938 | 3.1039824006 |  |
| Ni4                       | 4.4290624163  | 0.8099688608  | 4.5645660236 |  |
| Cu5                       | 0.0874747409  | 3.2737880611  | 4.0592227012 |  |
| S6                        | 3.1521209518  | -1.0979036851 | 5.4355389756 |  |
| S7                        | 2.2451878317  | 1.5040541581  | 3.6118491214 |  |
| F8                        | 4.4357391044  | -0.4234629823 | 2.8892204932 |  |
| N9                        | 0.3667612850  | -1.2860289879 | 3.6669871137 |  |
| H10                       | -0.0890242383 | -0.3750618346 | 3.5035251568 |  |
| N11                       | 2.7802255554  | -3.0116097909 | 2.4530155357 |  |
| N12                       | 1.9210010018  | -0.5649073103 | 1.0538746164 |  |
| H13                       | 1.2515486560  | -1.3047650112 | 0.8426149472 |  |
| N14                       | 5.4492786381  | 2.4093580017  | 3.6205222701 |  |
| H15                       | 6.0910983615  | 2.7650314266  | 4.3285205445 |  |

|     |               |               |               |
|-----|---------------|---------------|---------------|
| N16 | 6.5131221381  | 0.1184652214  | 5.1243958281  |
| N17 | 4.2245733030  | 1.8958189443  | 6.4290177226  |
| H18 | 3.5481302218  | 2.6307446233  | 6.1743550854  |
| C19 | 1.8593049474  | -0.2216770908 | 6.2852002270  |
| C20 | 0.5086517169  | -0.4986311834 | 6.0303221632  |
| C21 | -0.4824331369 | 0.2351255694  | 6.6751497154  |
| H22 | -1.5231110367 | 0.0063805392  | 6.4363091232  |
| C23 | -0.1924227491 | 1.2516796405  | 7.5891306448  |
| C24 | 1.1535908068  | 1.4959793000  | 7.8409615542  |
| H25 | 1.4454728780  | 2.2823553172  | 8.5365795062  |
| C26 | 2.1686943948  | 0.7798912326  | 7.2103439589  |
| C27 | 0.1238580263  | -1.6008951128 | 5.0965314362  |
| H28 | 0.6895597600  | -2.5104920431 | 5.3456762875  |
| H29 | -0.9485512529 | -1.8298217844 | 5.2291974486  |
| C30 | -0.3274777512 | -2.2731727634 | 2.8264181290  |
| H31 | -0.4061834687 | -1.8689123743 | 1.8046973974  |
| H32 | -1.3685679936 | -2.3846884288 | 3.1781243308  |
| C33 | 0.3419501830  | -3.6422646762 | 2.8023167286  |
| H34 | -0.3782029178 | -4.3571792455 | 2.3780526560  |
| H35 | 0.5277793720  | -3.9962053138 | 3.8265373540  |
| C36 | 1.5999114426  | -3.7400825096 | 1.9520840760  |
| H37 | 1.8735445342  | -4.8058874265 | 1.8157596472  |
| H38 | 1.3532412468  | -3.3677810339 | 0.9490096295  |
| C39 | 3.3449750678  | -3.7524079998 | 3.5842709226  |
| H40 | 2.6426682325  | -3.7929490350 | 4.4216707616  |
| H41 | 4.2468479126  | -3.2412664163 | 3.9383099974  |
| H42 | 3.6126497949  | -4.7822859075 | 3.2797197796  |
| C43 | 3.8392436170  | -2.9465877458 | 1.4190729628  |
| H44 | 4.1753616010  | -3.9782645744 | 1.1908162738  |
| H45 | 4.6717808713  | -2.4050009100 | 1.8861671016  |
| C46 | 3.4820246277  | -2.2512908736 | 0.1135313751  |
| H47 | 4.3725335895  | -2.3263543623 | -0.5272188954 |
| H48 | 2.6970604418  | -2.8000085799 | -0.4317441432 |
| C49 | 3.1135473091  | -0.7812662316 | 0.2128294585  |
| H50 | 3.9377377618  | -0.2148922868 | 0.6631288474  |
| H51 | 2.9425085863  | -0.3833089636 | -0.8031006407 |
| C52 | 1.2205622987  | 0.7129366415  | 0.7670962482  |
| H53 | 0.3860579477  | 0.8123324824  | 1.4751715473  |
| H54 | 0.7929303465  | 0.6719939658  | -0.2486813253 |
| C55 | 2.7531473102  | 2.2456834040  | 2.0751287895  |
| C56 | 2.1629517322  | 1.8700200191  | 0.8540405966  |
| C57 | 2.5523218349  | 2.4852479519  | -0.3289310489 |
| H58 | 2.0797036453  | 2.1459401966  | -1.2529919399 |
| C59 | 3.5389722356  | 3.4691528017  | -0.3825845786 |
| C60 | 4.1202440147  | 3.8205054017  | 0.8298869951  |
| H61 | 4.9146924310  | 4.5661727370  | 0.8569723462  |
| C62 | 3.7568015641  | 3.2254532473  | 2.0388820342  |
| C63 | 4.5707451827  | 3.5520600243  | 3.2502653045  |
| H64 | 5.1966013134  | 4.4343699315  | 3.0367591172  |
| H65 | 3.9351147327  | 3.7928455993  | 4.1150336224  |
| C66 | 6.2598941486  | 1.8956062361  | 2.4991925634  |
| H67 | 6.5931195057  | 2.7276537937  | 1.8551360852  |
| H68 | 5.6121599339  | 1.2425415344  | 1.9026861983  |
| C69 | 7.4781153554  | 1.1247067770  | 2.9797253540  |
| H70 | 8.1864278278  | 1.8093431782  | 3.4737601818  |
| H71 | 8.0129038852  | 0.7667095834  | 2.0880666227  |
| C72 | 7.2105615115  | -0.1060877494 | 3.8348803247  |
| H73 | 6.5676486072  | -0.7922012864 | 3.2692767134  |
| H74 | 8.1750152445  | -0.6130757866 | 4.0383252528  |
| C75 | 6.4090457330  | -1.1878415185 | 5.7815959362  |
| H76 | 7.4145540483  | -1.6032405701 | 5.9828231488  |
| H77 | 5.8617472855  | -1.8789896753 | 5.1319039126  |
| H78 | 5.8537757798  | -1.1144976251 | 6.7212368777  |
| C79 | 7.2949990178  | 1.0240257143  | 5.9879365818  |
| H80 | 7.6289430099  | 1.8816314865  | 5.3896906658  |
| H81 | 8.2208454458  | 0.5009903933  | 6.3011721346  |
| C82 | 6.5805950240  | 1.5699473669  | 7.2148561644  |
| H83 | 7.3390231130  | 2.1058379756  | 7.8041160109  |
| H84 | 6.2333931303  | 0.7562919219  | 7.8673990712  |
| C85 | 5.4432045153  | 2.5452512525  | 6.9336374252  |
| H86 | 5.2079213877  | 3.0964093550  | 7.8608342221  |
| H87 | 5.7643095366  | 3.3089853901  | 6.2082313212  |
| C88 | 3.5882320163  | 1.1146790016  | 7.5189427848  |

|      |               |              |               |
|------|---------------|--------------|---------------|
| H89  | 4.1710143151  | 0.1958787603 | 7.6712548074  |
| H90  | 3.6349356133  | 1.6996672967 | 8.4545672549  |
| C91  | -1.3174821812 | 2.0305426977 | 8.2601884375  |
| C92  | -2.1762195279 | 1.0633881396 | 9.0853681072  |
| H93  | -1.5782273428 | 0.5760388393 | 9.8694770011  |
| H94  | -2.6212186927 | 0.2742678665 | 8.4642012676  |
| H95  | -2.9993633613 | 1.6053236269 | 9.5738028364  |
| C96  | -2.1778447161 | 2.7068825546 | 7.1865121057  |
| H97  | -2.9789825419 | 3.2943777655 | 7.6589945647  |
| H98  | -2.6474325545 | 1.9828391067 | 6.5072988491  |
| H99  | -1.5712421933 | 3.3858673914 | 6.5682285258  |
| C100 | -0.7841597457 | 3.1139072480 | 9.1960345325  |
| H101 | -0.1793878519 | 2.6903810790 | 10.0117520757 |
| H102 | -1.6263308013 | 3.6489528929 | 9.6558695496  |
| H103 | -0.1769054416 | 3.8525899483 | 8.6536865855  |
| C104 | 3.9962433176  | 4.0163542142 | -1.7285177137 |
| C105 | 5.0671688886  | 5.0926841817 | -1.5762864251 |
| H106 | 5.3571948177  | 5.4719661274 | -2.5655171281 |
| H107 | 5.9744540869  | 4.6992114733 | -1.0960380991 |
| H108 | 4.7057166967  | 5.9445490569 | -0.9839142862 |
| C109 | 4.5920634232  | 2.8611315695 | -2.5448460982 |
| H110 | 4.9475342523  | 3.2199054801 | -3.5217523901 |
| H111 | 3.8561623025  | 2.0660107013 | -2.7275752407 |
| H112 | 5.4445690253  | 2.4104324540 | -2.0157644343 |
| C113 | 2.8057526114  | 4.6199738870 | -2.4783286722 |
| H114 | 2.3650294599  | 5.4484393047 | -1.9076559845 |
| H115 | 2.0148158568  | 3.8801738357 | -2.6560071302 |
| H116 | 3.1245669705  | 5.0081752089 | -3.4565101141 |

**Table S9b.** Cartesian coordinates of geometry optimized [LNi<sup>II</sup><sub>2</sub>(μ-F)(Cu<sup>I</sup>I<sub>2</sub>)] (6, M<sup>S</sup> = 5, quintet state, THF solution).

| final geometry: angstroms |               |               |              |  |
|---------------------------|---------------|---------------|--------------|--|
| atom                      | x             | y             | z            |  |
| I1                        | -1.7232978616 | 2.1624602514  | 3.1424331727 |  |
| I2                        | 1.5057654446  | 4.7945006552  | 5.7420149655 |  |
| Ni3                       | 2.3670005248  | -0.9181876475 | 3.0595332087 |  |
| Ni4                       | 4.4239166722  | 0.8145663897  | 4.5244486929 |  |
| Cu5                       | 0.5214875882  | 2.8833487492  | 4.2676406049 |  |
| S6                        | 3.0740714336  | -1.0742852698 | 5.4096618973 |  |
| S7                        | 2.2962261532  | 1.4895549584  | 3.5003388614 |  |
| F8                        | 4.3931248336  | -0.4485097799 | 2.8737206058 |  |
| N9                        | 0.2972262808  | -1.2481587314 | 3.5973480099 |  |
| H10                       | -0.1117590366 | -0.3204669712 | 3.4281935412 |  |
| N11                       | 2.6783241009  | -3.0235752536 | 2.4241735524 |  |
| N12                       | 1.8972918065  | -0.5875034849 | 0.9822590287 |  |
| H13                       | 1.2240877694  | -1.3102613761 | 0.7213788396 |  |
| N14                       | 5.4273758420  | 2.4546545213  | 3.5461376837 |  |
| H15                       | 6.0723101403  | 2.8481113681  | 4.2340878517 |  |
| N16                       | 6.4765990017  | 0.1796567874  | 5.0786941462 |  |
| N17                       | 4.1609202653  | 1.9170476874  | 6.3682783765 |  |
| H18                       | 3.4892605423  | 2.6436033504  | 6.0886797767 |  |
| C19                       | 1.7778724440  | -0.1788193850 | 6.2276686253 |  |
| C20                       | 0.4255888868  | -0.4524238838 | 5.9613178362 |  |
| C21                       | -0.5668798924 | 0.2803763018  | 6.6086425064 |  |
| H22                       | -1.6072477568 | 0.0543418046  | 6.3630256950 |  |
| C23                       | -0.2780029666 | 1.2814352556  | 7.5421744407 |  |
| C24                       | 1.0691151963  | 1.5199566877  | 7.8027013626 |  |
| H25                       | 1.3603376791  | 2.2946537469  | 8.5121663523 |  |
| C26                       | 2.0892073149  | 0.8177291293  | 7.1607003254 |  |
| C27                       | 0.0338617681  | -1.5545360640 | 5.0250371875 |  |
| H28                       | 0.5810181300  | -2.4729590488 | 5.2822762552 |  |
| H29                       | -1.0422364313 | -1.7701268669 | 5.1489870323 |  |
| C30                       | -0.4182575153 | -2.2132364637 | 2.7402614517 |  |
| H31                       | -0.4689037850 | -1.8023514797 | 1.7201664958 |  |
| H32                       | -1.4650509900 | -2.2972425323 | 3.0816052181 |  |
| C33                       | 0.2151757713  | -3.5985600991 | 2.7185162305 |  |
| H34                       | -0.5156548825 | -4.2879281311 | 2.2709284541 |  |
| H35                       | 0.3667211363  | -3.9694991941 | 3.7428202070 |  |
| C36                       | 1.4863247693  | -3.7216321813 | 1.8916201199 |  |

|      |               |               |               |
|------|---------------|---------------|---------------|
| H37  | 1.7394857530  | -4.7911375737 | 1.7572108124  |
| H38  | 1.2688190583  | -3.3415175621 | 0.8852288467  |
| C39  | 3.2003484370  | -3.7886208923 | 3.5640951251  |
| H40  | 2.4744855414  | -3.8236373635 | 4.3825842859  |
| H41  | 4.1079730554  | -3.3038042976 | 3.9407539611  |
| H42  | 3.4482699993  | -4.8211560648 | 3.2558182650  |
| C43  | 3.7662430560  | -2.9862252522 | 1.4105021596  |
| H44  | 4.0793636818  | -4.0266681549 | 1.1964445954  |
| H45  | 4.6021753081  | -2.4675674237 | 1.8972263522  |
| C46  | 3.4615276761  | -2.2916595458 | 0.0903065427  |
| H47  | 4.3718668717  | -2.3832116363 | -0.5205579289 |
| H48  | 2.6861854149  | -2.8306611405 | -0.4768840957 |
| C49  | 3.1111639034  | -0.8159584307 | 0.1709348430  |
| H50  | 3.9291456886  | -0.2565588985 | 0.6408166392  |
| H51  | 2.9663955491  | -0.4228120866 | -0.8504688754 |
| C52  | 1.2199197875  | 0.6980777378  | 0.6773287058  |
| H53  | 0.3879745797  | 0.8173720430  | 1.3864957520  |
| H54  | 0.7890522425  | 0.6472315804  | -0.3365215071 |
| C55  | 2.7626307428  | 2.2503614922  | 1.9568489360  |
| C56  | 2.1643636709  | 1.8582820928  | 0.7469919419  |
| C57  | 2.5277034128  | 2.4886617868  | -0.4389497988 |
| H58  | 2.0505517875  | 2.1461588508  | -1.3605056092 |
| C59  | 3.4896370271  | 3.5002164606  | -0.4939245207 |
| C60  | 4.0849030444  | 3.8556565898  | 0.7129576044  |
| H61  | 4.8651285641  | 4.6175200831  | 0.7349898640  |
| C62  | 3.7480644056  | 3.2450508616  | 1.9234619432  |
| C63  | 4.5517728037  | 3.5859961184  | 3.1400487264  |
| H64  | 5.1781568839  | 4.4673562251  | 2.9241291444  |
| H65  | 3.9058151895  | 3.8359697044  | 3.9944929350  |
| C66  | 6.2490287103  | 1.9311107534  | 2.4349168257  |
| H67  | 6.5811805379  | 2.7590830972  | 1.7853937452  |
| H68  | 5.6105961111  | 1.2666014407  | 1.8400684942  |
| C69  | 7.4685260882  | 1.1785960704  | 2.9367493527  |
| H70  | 8.1593800256  | 1.8765221771  | 3.4355773380  |
| H71  | 8.0198212924  | 0.8185482481  | 2.0554370735  |
| C72  | 7.1966532854  | -0.0467860719 | 3.7974378465  |
| H73  | 6.5720480319  | -0.7467650707 | 3.2284860373  |
| H74  | 8.1611434792  | -0.5418357224 | 4.0227340331  |
| C75  | 6.3814892815  | -1.1276111448 | 5.7410035560  |
| H76  | 7.3891834013  | -1.5325275937 | 5.9475158035  |
| H77  | 5.8450741775  | -1.8238753508 | 5.0864527244  |
| H78  | 5.8266654762  | -1.0544898202 | 6.6817378509  |
| C79  | 7.2445947784  | 1.1031921637  | 5.9449317303  |
| H80  | 7.5694124201  | 1.9637871171  | 5.3462293174  |
| H81  | 8.1744083382  | 0.5914952807  | 6.2606397746  |
| C82  | 6.5190752333  | 1.6425966649  | 7.1679087275  |
| H83  | 7.2669385306  | 2.1966056927  | 7.7539078297  |
| H84  | 6.1842334360  | 0.8294471213  | 7.8284589581  |
| C85  | 5.3695245622  | 2.5965033272  | 6.8720380913  |
| H86  | 5.1166732247  | 3.1583465198  | 7.7884351716  |
| H87  | 5.6799129499  | 3.3523873436  | 6.1339922523  |
| C88  | 3.5110789954  | 1.1617996165  | 7.4701502502  |
| H89  | 4.0952913566  | 0.2499023335  | 7.6549404665  |
| H90  | 3.5489199102  | 1.7692016435  | 8.3915527044  |
| C91  | -1.4066648314 | 2.0565332664  | 8.2175522389  |
| C92  | -2.3158383630 | 1.0777966500  | 8.9704898395  |
| H93  | -1.7539440424 | 0.5367196096  | 9.7461058994  |
| H94  | -2.7626456105 | 0.3332795109  | 8.2972882799  |
| H95  | -3.1382637384 | 1.6205973310  | 9.4603791590  |
| C96  | -2.2228767311 | 2.7981385917  | 7.1527220230  |
| H97  | -3.0216343053 | 3.3848808156  | 7.6313436543  |
| H98  | -2.6900588011 | 2.1110944781  | 6.4340094228  |
| H99  | -1.5819168759 | 3.4832126027  | 6.5775393812  |
| C100 | -0.8809726730 | 3.0876881932  | 9.2155130658  |
| H101 | -0.2974745477 | 2.6186552349  | 10.0215892590 |
| H102 | -1.7270973768 | 3.6136636840  | 9.6803848984  |
| H103 | -0.2497526529 | 3.8411842001  | 8.7221523565  |
| C104 | 3.8938618029  | 4.0948928751  | -1.8386575489 |
| C105 | 4.9499948378  | 5.1878043544  | -1.6904778227 |
| H106 | 5.2038239110  | 5.5941097100  | -2.6796728809 |
| H107 | 5.8780836446  | 4.8021816856  | -1.2441064100 |
| H108 | 4.5899172950  | 6.0206354161  | -1.0696765451 |
| C109 | 4.4783010146  | 2.9794260191  | -2.7162396975 |

|      |              |              |               |
|------|--------------|--------------|---------------|
| H110 | 4.7844126207 | 3.3815989144 | -3.6936892134 |
| H111 | 3.7518577747 | 2.1750862242 | -2.8974416142 |
| H112 | 5.3618914635 | 2.5316183577 | -2.2385587897 |
| C113 | 2.6670916295 | 4.7003867986 | -2.5294848064 |
| H114 | 2.2346041846 | 5.5083852619 | -1.9224168708 |
| H115 | 1.8820312247 | 3.9521297959 | -2.7013857364 |
| H116 | 2.9483948574 | 5.1197288651 | -3.5068943369 |

**Table S9c.** Cartesian coordinates of geometry optimized [LNi<sup>II</sup><sub>2</sub>( $\mu$ -F)(Cu<sup>I</sup>I<sub>2</sub>)] (**6**, M<sup>S</sup> = 5, quintet state, MeCN solution).

| final geometry: angstroms |               |               |               |
|---------------------------|---------------|---------------|---------------|
| atom                      | x             | y             | z             |
| I1                        | -1.7834955524 | 2.4637615140  | 3.2532950633  |
| I2                        | 1.6025415003  | 4.9730084397  | 5.5102051949  |
| Ni3                       | 2.2992694386  | -1.0751060543 | 3.1403918437  |
| Ni4                       | 4.4447301302  | 0.8081443363  | 4.2962667453  |
| Cu5                       | 0.5921442809  | 2.8922519940  | 4.2778006180  |
| S6                        | 3.2267045541  | -1.0519111880 | 5.4376618000  |
| S7                        | 2.1888453967  | 1.3701205496  | 3.4701615036  |
| F8                        | 4.2617717272  | -0.5452613480 | 2.7324073063  |
| N9                        | 0.2982250733  | -1.4536184353 | 3.8943154261  |
| H10                       | -0.1708776024 | -0.5680623748 | 3.6771306986  |
| N11                       | 2.6707620552  | -3.1783430558 | 2.5856600625  |
| N12                       | 1.5815285880  | -0.8711774383 | 1.1179567460  |
| H13                       | 0.9068895576  | -1.6233504628 | 0.9587701448  |
| N14                       | 5.3065617758  | 2.3921068766  | 3.1175846416  |
| H15                       | 6.0095354823  | 2.8543588545  | 3.6984671758  |
| N16                       | 6.5464988727  | 0.2478012790  | 4.6925887784  |
| N17                       | 4.3236150167  | 2.0458450680  | 6.0630276719  |
| H18                       | 3.6235194415  | 2.7447406037  | 5.7868625809  |
| C19                       | 1.9810540702  | -0.1112022887 | 6.2823028444  |
| C20                       | 0.6184582957  | -0.4314315212 | 6.1504536172  |
| C21                       | -0.3401878290 | 0.3495521120  | 6.7927541065  |
| H22                       | -1.3910263921 | 0.0817190882  | 6.6537208470  |
| C23                       | -0.0031208107 | 1.4409652971  | 7.6018456168  |
| C24                       | 1.3540897319  | 1.7254131054  | 7.7314648165  |
| H25                       | 1.6812226343  | 2.5668411693  | 8.3427546019  |
| C26                       | 2.3399743652  | 0.9769358941  | 7.0873329421  |
| C27                       | 0.1854341869  | -1.6310926278 | 5.3638229166  |
| H28                       | 0.7949988111  | -2.5013944105 | 5.6451146139  |
| H29                       | -0.8617608451 | -1.8740929994 | 5.6150865516  |
| C30                       | -0.4281397958 | -2.5387575966 | 3.2009931392  |
| H31                       | -0.6146322300 | -2.2253257317 | 2.1623719283  |
| H32                       | -1.4227888707 | -2.6639477326 | 3.6625870318  |
| C33                       | 0.3050356601  | -3.8734866729 | 3.2195531125  |
| H34                       | -0.4180717637 | -4.6483228911 | 2.9256621652  |
| H35                       | 0.6052273439  | -4.1359926653 | 4.2445522161  |
| C36                       | 1.4735766686  | -3.9848036992 | 2.2527851586  |
| H37                       | 1.7826769990  | -5.0436613106 | 2.1625533177  |
| H38                       | 1.1129551826  | -3.6948270162 | 1.2573495110  |
| C39                       | 3.3848811853  | -3.8268885290 | 3.6943064222  |
| H40                       | 2.7645314227  | -3.8659022622 | 4.5952344530  |
| H41                       | 4.2878197914  | -3.2505019093 | 3.9259454548  |
| H42                       | 3.6794217193  | -4.8544953950 | 3.4142659111  |
| C43                       | 3.6170572292  | -3.1542788074 | 1.4375384360  |
| H44                       | 3.9551827528  | -4.1907234846 | 1.2467606832  |
| H45                       | 4.4792440901  | -2.5679648401 | 1.7790479475  |
| C46                       | 3.1046594014  | -2.5617133552 | 0.1333181354  |
| H47                       | 3.9273165425  | -2.6572527078 | -0.5909121817 |
| H48                       | 2.2840853899  | -3.1635466852 | -0.2882571669 |
| C49                       | 2.6990958737  | -1.0996297254 | 0.1766752073  |
| H50                       | 3.5412270010  | -0.4790073871 | 0.5072682903  |
| H51                       | 2.4116591060  | -0.7759356299 | -0.8387201431 |
| C52                       | 0.8338615040  | 0.3824456792  | 0.8402003251  |
| H53                       | 0.0966838906  | 0.5244643595  | 1.6434283565  |
| H54                       | 0.2786682030  | 0.2686700248  | -0.1055015625 |
| C55                       | 2.4754104328  | 2.0362983097  | 1.8387758443  |
| C56                       | 1.7537147806  | 1.5590194084  | 0.7312877027  |
| C57                       | 1.9815321671  | 2.1043025385  | -0.5279920636 |

|      |               |               |               |
|------|---------------|---------------|---------------|
| H58  | 1.4158235488  | 1.6919871200  | -1.3669798937 |
| C59  | 2.9270117043  | 3.1061727758  | -0.7560848978 |
| C60  | 3.6420724959  | 3.5509943642  | 0.3513940188  |
| H61  | 4.4152101879  | 4.3108840714  | 0.2343824516  |
| C62  | 3.4408938082  | 3.0302933423  | 1.6319209355  |
| C63  | 4.3630942576  | 3.4713709326  | 2.7263700984  |
| H64  | 4.9397711389  | 4.3462528120  | 2.3839025193  |
| H65  | 3.8046617091  | 3.7705350238  | 3.6254423042  |
| C66  | 6.0255382444  | 1.8033797129  | 1.9669654396  |
| H67  | 6.2754466339  | 2.5890670622  | 1.2339317195  |
| H68  | 5.3460091681  | 1.0886647250  | 1.4866981754  |
| C69  | 7.3042049318  | 1.1071947532  | 2.3982387185  |
| H70  | 8.0229424025  | 1.8497887666  | 2.7789063509  |
| H71  | 7.7762365962  | 0.6936827073  | 1.4946455492  |
| C72  | 7.1450610892  | -0.0575326379 | 3.3648289617  |
| H73  | 6.4856784768  | -0.8082635147 | 2.9108760516  |
| H74  | 8.1377398863  | -0.5191436649 | 3.5288544025  |
| C75  | 6.5552110127  | -1.0090616237 | 5.4529594048  |
| H76  | 7.5897644229  | -1.3741056318 | 5.5872302223  |
| H77  | 5.9807900151  | -1.7653924719 | 4.9064021247  |
| H78  | 6.0923868150  | -0.8781429195 | 6.4362970033  |
| C79  | 7.3702482913  | 1.2469351415  | 5.4137129579  |
| H80  | 7.6123330752  | 2.0703171550  | 4.7296598569  |
| H81  | 8.3391576973  | 0.7772664074  | 5.6701365810  |
| C82  | 6.7504816571  | 1.8540204913  | 6.6628167931  |
| H83  | 7.5373986215  | 2.4574715620  | 7.1382884992  |
| H84  | 6.4953834499  | 1.0823292008  | 7.4040470548  |
| C85  | 5.5610668059  | 2.7709952092  | 6.4136768117  |
| H86  | 5.3787193247  | 3.3867606232  | 7.3119244084  |
| H87  | 5.7906466384  | 3.4804104528  | 5.6032848499  |
| C88  | 3.7737395973  | 1.3683443829  | 7.2638614899  |
| H89  | 4.3911008028  | 0.4837330801  | 7.4716179120  |
| H90  | 3.8649680967  | 2.0446387061  | 8.1320262148  |
| C91  | -1.0903260640 | 2.2509463245  | 8.3026289894  |
| C92  | -1.8823625430 | 1.3327948826  | 9.2414243193  |
| H93  | -1.2255298877 | 0.8961068431  | 10.0081643768 |
| H94  | -2.3616839527 | 0.5072796390  | 8.6972008593  |
| H95  | -2.6739015594 | 1.9012777249  | 9.7530783433  |
| C96  | -2.0359780813 | 2.8480637986  | 7.2554323370  |
| H97  | -2.8060096520 | 3.4616236677  | 7.7470916430  |
| H98  | -2.5460779128 | 2.0726324194  | 6.6679467165  |
| H99  | -1.4815703723 | 3.4810648432  | 6.5460529007  |
| C100 | -0.5108761514 | 3.3982232268  | 9.1289475493  |
| H101 | 0.1633544465  | 3.0351531721  | 9.9186685331  |
| H102 | -1.3283960480 | 3.9482846231  | 9.6170203260  |
| H103 | 0.0439644262  | 4.1100068934  | 8.4995812377  |
| C104 | 3.2063906565  | 3.5809839417  | -2.1779538537 |
| C105 | 4.2223748993  | 4.7206872508  | -2.2170950912 |
| H106 | 4.3769589600  | 5.0412624871  | -3.2569795183 |
| H107 | 5.1999365902  | 4.4131526830  | -1.8184907549 |
| H108 | 3.8777400062  | 5.5936386665  | -1.6442210487 |
| C109 | 3.7769390945  | 2.4020175959  | -2.9788903743 |
| H110 | 4.0033739702  | 2.7117642883  | -4.0102324322 |
| H111 | 3.0711450281  | 1.5609129653  | -3.0260767347 |
| H112 | 4.7066088286  | 2.0338573851  | -2.5203634408 |
| C113 | 1.9107767371  | 4.0679617588  | -2.8357222649 |
| H114 | 1.4823346576  | 4.9126469204  | -2.2774188542 |
| H115 | 1.1503110786  | 3.2771036195  | -2.8865061339 |
| H116 | 2.1098976582  | 4.4041768535  | -3.8641712932 |

## References

- S1 A. Jeremies, U. Lehmann, S. Gruschinski, F. Schleife, M. Meyer, V. Matulis, O. A. Ivashkevich, M. Handke, K. Stein, B. Kersting, *Inorg. Chem.* **2015**, *54*, 3937-3950.
- S2 Stoe & Cie, *X-AREA and X-RED 32*; V1.35, Stoe & Cie: Darmstadt, Germany, 2006.
- S3 G. M. Sheldrick, *Acta Crystallogr.* **1990**, *A46*, 467-473.

- S4 G. M. Sheldrick, *SHELXL-97*, Computer program for crystal structure refinement, University of Göttingen, Göttingen, Germany, **1997**.
- S5 A. L. Spek, *PLATON - A Multipurpose Crystallographic Tool*; Utrecht University, Utrecht, The Netherlands, **2000**.
- S6 ORTEP 3 for Windows 10, L. J. Farrugia, *J. Appl. Cryst.* **2012**, *45*, 849-854.
- S7 POV-Ray for windows, Version 3.7.0.msvc10.win64.
- S8 A. Bondi, *J. Phys. Chem.* **1964**, *68*, 441-451.
- S9 M. Jurić, B. Perić, N. Brnicević, P. Planinić, D. Pajić, K. Zadro, G. Giester, B. Kaitner, *Dalton Trans.* **2008**, 742.
- S10 Jeremies, U. Lehmann, S. Gruschinski, V. Matulis, O. A. Ivashkevich, A. Jäschke, B. Kersting, *J. Organomet. Chem.* **2016**, *821*, 171-181.
- S11 R. T. Azuah, L. R. Kneller, Y. Qiu, P. L. W. Tregenna-Piggott, C. M. Brown, J. R. D. Copley, R. M. J. Dimeo, *J. Res. Natl. Inst. Stand. Technol.* **2009**, *114*, 341-358.
- S12 C. J. O'Connor, *Prog. Inorg. Chem.* **1982**, *29*, 203-283.
- S13 O. Kahn, *O. Molecular magnetism*; VCH: Weinheim, 1993.
- S14 R. Herchel, R. Boca, J. Krzystek, A. Ozarowski, M. Duran, J. van Slageren, *J. Am. Chem. Soc.* **2007**, *129*, 10306-10307.
- S15 The *D* values should be taken as indicative rather than definitive, because temperature dependent magnetic susceptibility measurements are not very appropriate for the determination of *D* values. A. Meyer, A. Gleizes, J.-J. Girerd, M. Verdaguer, O. Kahn, *Inorg. Chem.* **1982**, *21*, 1729-1739.
- S16 G. Steinfeld, V. Lozan, H.-J. Krüger, B. Kersting, *Angew. Chem. Int. Ed.* **2009**, *48*, 1954-1957; *Angew. Chem.* **2009**, *121*, 1988-1991.
- S17 B. Kersting, G. Steinfeld, *Inorg. Chem.* **2002**, *41*, 1140-1150.
- S18 Jaguar, version 10.3, Schrodinger, Inc., New York, NY, 2019.



- S19 Y. Zhao, D. G. Truhlar, *Theor. Chem. Account*, **2008**, *120*, 215–241.
- S20 S. Grimme, J. Antony, S. Ehrlich, H. Krieg, *J. Chem. Phys* **2010**, *132*, 154104(1–19).
- S21 N. Beyer, G. Steinfeld, V. Lozan, S. Naumov, R. Flyunt, B. Abel, B. Kersting, *Chem. Eur. J.* **2017**, *23*, 2303-2314.
- S22 W. R. Wadt, P. J. Hay, *J. Chem. Phys.* **1985**, *82*, 284–298.
- S23 D. J. Tannor, B. Marten, R. Murphy, R. A. Friesner, D. Sitkoff, A. Nicholls, M. Ringnalda, W. A. Goddard, III, B. Honig, *J. Am. Chem. Soc.* **1994**, *116*, 11875–11882.
